# Supplementary material for: Photoreflectance/scattering measurements of spider silks informed by standard optics
Source: R Soc Open Sci. 2020 Apr 22;7(4):192174. doi: 10.1098/rsos.192174 (PMC7211891; doi:10.1098/rsos.192174)
Supplement: Phonognatha graeffei Reflectance-Scattering Measurement Data [file rsos192174supp4.xlsx]

## Sheet: Sheet1
Phonognatha graeffei Measurement 21 Dec 2018					Column A - wavelength; then for each measurment number a pair of reflectance and normalised reflectance values													RSOS Photoreflectance/Scattering Measurements of Spider Silks Informed by Standard Optics
			1		2		3		4		5		6		7		8	Sean J. Blamires, Douglas J. Little, Thomas E. White, Deb M. Kane
299.98			5.585	1.1064	5.7	1.1172	5.774	1.0931	5.93	1.2497	5.82	1.2047	5.963	1.1264	5.702	1.0836	4.232	1.204
300.18			5.459	1.0814	5.581	1.0939	5.702	1.0795	5.869	1.2369	5.83	1.2068	5.878	1.1103	5.647	1.0732	4.181	1.1895
300.39			5.466	1.0828	5.6	1.0976	5.712	1.0814	5.884	1.24	5.849	1.2107	6.012	1.1356	5.679	1.0792	4.287	1.2196
300.6			5.55	1.0994	5.606	1.0988	5.653	1.0702	5.838	1.2303	5.84	1.2089	5.94	1.122	5.648	1.0734	4.265	1.2134
300.81			5.454	1.0804	5.463	1.0708	5.531	1.0471	5.644	1.1895	5.806	1.2018	5.901	1.1147	5.562	1.057	4.207	1.1969
301.01			5.529	1.0953	5.445	1.0672	5.668	1.0731	5.732	1.208	5.78	1.1964	5.868	1.1084	5.588	1.062	4.174	1.1875
301.22			5.56	1.1014	5.44	1.0662	5.685	1.0763	5.832	1.2291	5.827	1.2062	5.8	1.0956	5.616	1.0673	4.17	1.1863
301.43			5.613	1.1119	5.37	1.0525	5.673	1.074	5.795	1.2213	5.798	1.2002	5.855	1.106	5.609	1.0659	4.163	1.1844
301.63			5.446	1.0788	5.342	1.047	5.66	1.0716	5.789	1.22	5.804	1.2014	5.888	1.1122	5.66	1.0756	4.185	1.1906
301.84			5.43	1.0757	5.447	1.0676	5.728	1.0844	5.827	1.228	5.756	1.1915	5.897	1.1139	5.747	1.0922	4.195	1.1935
302.05			5.468	1.0832	5.549	1.0876	5.74	1.0867	5.762	1.2143	5.671	1.1739	5.844	1.1039	5.646	1.073	4.139	1.1775
302.26			5.513	1.0921	5.659	1.1092	5.763	1.0911	5.907	1.2449	5.714	1.1828	6.018	1.1368	5.746	1.092	4.281	1.2179
302.46			5.504	1.0903	5.675	1.1123	5.765	1.0914	5.944	1.2527	5.724	1.1848	5.981	1.1298	5.79	1.1003	4.291	1.2208
302.67			5.471	1.0838	5.526	1.0831	5.795	1.0971	5.94	1.2518	5.714	1.1828	5.923	1.1188	5.793	1.1009	4.291	1.2208
302.88			5.419	1.0735	5.561	1.09	5.836	1.1049	5.975	1.2592	5.76	1.1923	5.994	1.1322	5.81	1.1041	4.329	1.2316
303.08			5.399	1.0695	5.588	1.0953	5.902	1.1174	6.185	1.3035	5.762	1.1927	6.026	1.1383	5.869	1.1154	4.435	1.2617
303.29			5.336	1.0571	5.586	1.0949	5.901	1.1172	6.165	1.2993	5.681	1.1759	6.057	1.1441	5.744	1.0916	4.394	1.2501
303.5			5.349	1.0596	5.495	1.077	5.877	1.1126	6.009	1.2664	5.824	1.2055	6.116	1.1553	5.817	1.1055	4.502	1.2808
303.7			5.263	1.0426	5.553	1.0884	5.984	1.1329	5.984	1.2611	5.857	1.2124	6.033	1.1396	5.736	1.0901	4.525	1.2873
303.91			5.337	1.0573	5.597	1.097	6.006	1.1371	5.959	1.2558	5.74	1.1882	5.973	1.1283	5.653	1.0743	4.474	1.2728
304.12			5.303	1.0505	5.472	1.0725	6.066	1.1484	5.993	1.263	5.616	1.1625	5.929	1.1199	5.595	1.0633	4.399	1.2515
304.32			5.23	1.0361	5.4	1.0584	6.052	1.1458	6.05	1.275	5.628	1.165	6.009	1.1351	5.602	1.0646	4.495	1.2788
304.53			5.197	1.0295	5.355	1.0496	6.031	1.1418	5.966	1.2573	5.565	1.1519	5.947	1.1233	5.473	1.0401	4.399	1.2515
304.74			5.245	1.039	5.362	1.051	6.05	1.1454	5.953	1.2546	5.508	1.1401	5.882	1.1111	5.419	1.0298	4.354	1.2387
304.95			5.29	1.0479	5.36	1.0506	5.955	1.1274	5.896	1.2426	5.479	1.1341	5.875	1.1097	5.429	1.0317	4.329	1.2316
305.15			5.213	1.0327	5.28	1.0349	5.761	1.0907	5.803	1.223	5.504	1.1393	5.842	1.1035	5.521	1.0492	4.312	1.2267
305.36			5.229	1.0359	5.313	1.0414	5.661	1.0718	5.731	1.2078	5.479	1.1341	5.744	1.085	5.466	1.0388	4.217	1.1997
305.57			5.227	1.0355	5.418	1.0619	5.663	1.0721	5.809	1.2242	5.52	1.1426	5.72	1.0805	5.491	1.0435	4.238	1.2057
305.77			5.191	1.0283	5.385	1.0555	5.616	1.0632	5.857	1.2344	5.454	1.129	5.726	1.0816	5.433	1.0325	4.114	1.1704
305.98			5.243	1.0386	5.417	1.0617	5.579	1.0562	5.821	1.2268	5.383	1.1143	5.67	1.071	5.496	1.0445	4.06	1.155
306.19			5.323	1.0545	5.419	1.0621	5.635	1.0668	5.894	1.2421	5.626	1.1646	5.847	1.1045	5.729	1.0887	4.15	1.1807
306.39			5.247	1.0394	5.356	1.0498	5.505	1.0422	5.695	1.2002	5.646	1.1687	5.802	1.096	5.709	1.0849	4.194	1.1932
306.6			5.198	1.0297	5.406	1.0596	5.442	1.0303	5.592	1.1785	5.607	1.1606	5.677	1.0723	5.723	1.0876	4.116	1.171
306.81			5.129	1.016	5.348	1.0482	5.427	1.0275	5.643	1.1893	5.709	1.1817	5.696	1.0759	5.818	1.1057	4.095	1.165
307.01			5.053	1.001	5.31	1.0408	5.404	1.0231	5.66	1.1928	5.695	1.1788	5.711	1.0788	5.854	1.1125	4.099	1.1661
307.22			5.111	1.0125	5.479	1.0739	5.482	1.0379	5.753	1.2124	5.669	1.1735	5.677	1.0723	5.766	1.0958	4.015	1.1422
307.43			5.195	1.0291	5.464	1.071	5.594	1.0591	5.793	1.2209	5.651	1.1697	5.639	1.0652	5.644	1.0726	3.966	1.1283
307.63			5.075	1.0053	5.457	1.0696	5.608	1.0617	5.781	1.2183	5.663	1.1722	5.709	1.0784	5.551	1.0549	3.877	1.103
307.84			5.15	1.0202	5.317	1.0421	5.523	1.0456	5.742	1.2101	5.751	1.1904	5.76	1.088	5.614	1.0669	3.941	1.1212
308.05			5.187	1.0275	5.391	1.0566	5.516	1.0443	5.797	1.2217	5.695	1.1788	5.731	1.0825	5.66	1.0756	3.951	1.124
308.25			5.139	1.018	5.34	1.0466	5.481	1.0377	5.84	1.2308	5.674	1.1745	5.671	1.0712	5.616	1.0673	3.947	1.1229
308.46			5.045	0.9994	5.354	1.0494	5.46	1.0337	5.745	1.2107	5.593	1.1577	5.595	1.0569	5.514	1.0479	3.874	1.1021
308.67			5.192	1.0285	5.492	1.0764	5.618	1.0636	5.898	1.243	5.641	1.1677	5.648	1.0669	5.527	1.0504	3.911	1.1127
308.88			5.138	1.0178	5.442	1.0666	5.655	1.0706	5.969	1.258	5.69	1.1778	5.606	1.0589	5.453	1.0363	4.015	1.1422
309.08			5.266	1.0432	5.461	1.0704	5.715	1.082	5.904	1.2443	5.7	1.1799	5.757	1.0875	5.489	1.0431	4.142	1.1784
309.29			5.283	1.0466	5.562	1.0902	5.812	1.1003	5.983	1.2609	5.768	1.194	5.862	1.1073	5.541	1.053	4.261	1.2122
309.5			5.261	1.0422	5.552	1.0882	5.787	1.0956	5.949	1.2537	5.596	1.1584	5.689	1.0746	5.506	1.0464	4.2	1.1949
309.7			5.278	1.0456	5.569	1.0915	5.898	1.1166	5.972	1.2586	5.594	1.1579	5.765	1.089	5.646	1.073	4.321	1.2293
309.91			5.411	1.0719	5.487	1.0755	6	1.1359	6.014	1.2674	5.603	1.1598	5.794	1.0944	5.673	1.0781	4.405	1.2532
310.12			5.401	1.0699	5.592	1.096	6.102	1.1552	6.089	1.2832	5.536	1.1459	5.777	1.0912	5.703	1.0838	4.365	1.2418
310.32			5.37	1.0638	5.53	1.0839	6.153	1.1649	6.138	1.2936	5.614	1.1621	5.775	1.0909	5.752	1.0931	4.484	1.2757
310.53			5.33	1.0559	5.494	1.0768	6.067	1.1486	6.164	1.2991	5.682	1.1762	5.747	1.0856	5.791	1.1005	4.524	1.2871
310.74			5.348	1.0594	5.436	1.0655	6.031	1.1418	6.148	1.2957	5.622	1.1637	5.61	1.0597	5.714	1.0859	4.469	1.2714
310.94			5.314	1.0527	5.386	1.0557	5.913	1.1195	6.125	1.2908	5.646	1.1687	5.57	1.0521	5.756	1.0939	4.435	1.2617
311.15			5.415	1.0727	5.434	1.0651	5.972	1.1306	6.046	1.2742	5.692	1.1782	5.691	1.075	5.905	1.1222	4.389	1.2486
311.36			5.352	1.0602	5.469	1.0719	5.895	1.1161	6.03	1.2708	5.633	1.166	5.552	1.0487	5.855	1.1127	4.347	1.2367
311.56			5.404	1.0705	5.42	1.0623	5.842	1.106	6.008	1.2662	5.545	1.1478	5.571	1.0523	5.869	1.1154	4.297	1.2225
311.77			5.347	1.0592	5.312	1.0412	5.803	1.0986	5.991	1.2626	5.711	1.1822	5.773	1.0905	6.02	1.1441	4.418	1.2569
311.98			5.239	1.0378	5.236	1.0263	5.687	1.0767	5.927	1.2491	5.604	1.16	5.614	1.0604	5.878	1.1171	4.316	1.2279
312.18			5.201	1.0303	5.301	1.039	5.563	1.0532	5.877	1.2386	5.474	1.1331	5.547	1.0478	5.937	1.1283	4.308	1.2256
312.39			5.171	1.0244	5.298	1.0384	5.526	1.0462	5.919	1.2474	5.469	1.1321	5.479	1.0349	5.911	1.1233	4.363	1.2413
312.59			5.168	1.0238	5.24	1.027	5.478	1.0371	5.784	1.219	5.42	1.1219	5.479	1.0349	5.795	1.1013	4.204	1.196
312.8			5.158	1.0218	5.219	1.0229	5.503	1.0418	5.698	1.2008	5.407	1.1192	5.598	1.0574	5.804	1.103	4.219	1.2003
313.01			5.228	1.0357	5.185	1.0163	5.494	1.0401	5.677	1.1964	5.409	1.1196	5.635	1.0644	5.84	1.1098	4.251	1.2094
313.21			5.067	1.0038	5.13	1.0055	5.387	1.0199	5.515	1.1623	5.411	1.1201	5.735	1.0833	5.81	1.1041	4.234	1.2046
313.42			5.013	0.9931	5.116	1.0027	5.41	1.0242	5.558	1.1713	5.349	1.1072	5.698	1.0763	5.708	1.0848	4.206	1.1966
313.63			5.06	1.0024	5.13	1.0055	5.427	1.0275	5.588	1.1777	5.291	1.0952	5.704	1.0774	5.7	1.0832	4.2	1.1949
313.83			5.013	0.9931	4.981	0.9763	5.374	1.0174	5.509	1.161	5.3	1.0971	5.609	1.0595	5.625	1.069	4.188	1.1915
314.04			4.944	0.9794	5.01	0.982	5.393	1.021	5.491	1.1572	5.305	1.0981	5.515	1.0417	5.414	1.0289	4.137	1.177
314.25			4.985	0.9875	5.163	1.012	5.445	1.0309	5.571	1.1741	5.325	1.1023	5.559	1.0501	5.434	1.0327	4.139	1.1775
314.45			5.042	0.9988	5.236	1.0263	5.535	1.0479	5.669	1.1947	5.421	1.1221	5.633	1.064	5.388	1.0239	4.059	1.1548
314.66			5.059	1.0022	5.083	0.9963	5.527	1.0464	5.51	1.1612	5.557	1.1503	5.742	1.0846	5.413	1.0287	4.043	1.1502
314.87			4.952	0.981	5.146	1.0086	5.534	1.0477	5.518	1.1629	5.517	1.142	5.642	1.0657	5.324	1.0118	4.048	1.1516
315.07			4.833	0.9574	5.169	1.0131	5.528	1.0466	5.507	1.1606	5.458	1.1298	5.559	1.0501	5.249	0.9975	3.998	1.1374
315.28			4.733	0.9376	5.231	1.0253	5.547	1.0502	5.577	1.1753	5.489	1.1362	5.684	1.0737	5.37	1.0205	4.088	1.163
315.49			4.909	0.9725	5.291	1.037	5.813	1.1005	5.778	1.2177	5.397	1.1172	5.687	1.0742	5.325	1.012	4.12	1.1721
315.69			4.869	0.9645	5.29	1.0368	5.759	1.0903	5.811	1.2247	5.426	1.1232	5.636	1.0646	5.289	1.0051	4.004	1.1391
315.9			4.804	0.9517	5.314	1.0416	5.878	1.1128	5.911	1.2457	5.428	1.1236	5.624	1.0623	5.353	1.0173	3.874	1.1021
316.11			4.711	0.9332	5.425	1.0633	5.887	1.1145	6.067	1.2786	5.405	1.1188	5.665	1.0701	5.397	1.0257	3.908	1.1118
316.31			4.809	0.9527	5.387	1.0559	5.978	1.1318	6.091	1.2837	5.444	1.1269	5.733	1.0829	5.601	1.0644	3.793	1.0791
316.52			4.893	0.9693	5.395	1.0574	5.958	1.128	6.111	1.2879	5.476	1.1335	5.732	1.0827	5.677	1.0789	3.898	1.109
316.72			4.826	0.956	5.308	1.0404	6.025	1.1407	6.115	1.2887	5.437	1.1254	5.706	1.0778	5.79	1.1003	3.989	1.1349
316.93			4.842	0.9592	5.43	1.0643	6.111	1.1569	6.134	1.2927	5.249	1.0865	5.628	1.0631	5.707	1.0846	3.913	1.1132
317.14			4.968	0.9842	5.414	1.0612	6.116	1.1579	6.168	1.2999	5.272	1.0913	5.771	1.0901	5.802	1.1026	3.852	1.0959
317.34			5.05	1.0004	5.406	1.0596	6.112	1.1571	6.259	1.3191	5.339	1.1052	5.848	1.1046	5.899	1.1211	3.895	1.1081
317.55			5.158	1.0218	5.425	1.0633	6.124	1.1594	6.275	1.3224	5.204	1.0772	5.711	1.0788	5.868	1.1152	3.804	1.0822
317.76			5.154	1.021	5.418	1.0619	6.054	1.1462	6.216	1.31	5.322	1.1016	5.61	1.0597	5.878	1.1171	3.791	1.0785
317.96			5.076	1.0055	5.298	1.0384	6.032	1.142	6.096	1.2847	5.272	1.0913	5.641	1.0655	5.925	1.126	3.936	1.1198
318.17			5.087	1.0077	5.197	1.0186	5.987	1.1335	6	1.2645	5.255	1.0878	5.581	1.0542	5.858	1.1133	4.017	1.1428
318.38			5.116	1.0135	5.189	1.0171	5.996	1.1352	5.849	1.2327	5.27	1.0909	5.475	1.0342	5.775	1.0975	3.836	1.0913
318.58			5.067	1.0038	5.222	1.0235	5.872	1.1117	5.855	1.2339	5.213	1.0791	5.526	1.0438	5.73	1.0889	4.029	1.1462
318.79			4.997	0.9899	5.173	1.0139	5.791	1.0964	5.886	1.2405	5.295	1.096	5.592	1.0563	5.707	1.0846	3.929	1.1178
318.99			4.91	0.9727	5.093	0.9982	5.733	1.0854	5.747	1.2112	5.427	1.1234	5.657	1.0686	5.699	1.083	4.014	1.142
319.2			4.856	0.962	4.984	0.9769	5.486	1.0386	5.796	1.2215	5.601	1.1594	5.749	1.0859	5.78	1.0984	4.181	1.1895
319.41			4.845	0.9598	4.973	0.9747	5.479	1.0373	5.853	1.2335	5.631	1.1656	5.713	1.0791	5.794	1.1011	4.334	1.233
319.61			4.783	0.9475	4.932	0.9667	5.449	1.0316	5.769	1.2158	5.633	1.166	5.671	1.0712	5.663	1.0762	4.292	1.2211
319.82			4.803	0.9515	4.841	0.9488	5.467	1.035	5.716	1.2046	5.707	1.1813	5.646	1.0665	5.593	1.0629	4.338	1.2341
320.03			4.705	0.9321	4.767	0.9343	5.253	0.9945	5.751	1.212	5.633	1.166	5.63	1.0635	5.583	1.061	4.244	1.2074
320.23			4.835	0.9578	4.792	0.9392	5.231	0.9903	5.855	1.2339	5.734	1.1869	5.678	1.0725	5.592	1.0627	4.144	1.1789
320.44			4.904	0.9715	4.827	0.9461	5.284	1.0004	5.894	1.2421	5.682	1.1762	5.608	1.0593	5.517	1.0485	4.11	1.1693
320.64			4.894	0.9695	4.786	0.9381	5.184	0.9814	5.851	1.2331	5.664	1.1724	5.572	1.0525	5.461	1.0378	4.062	1.1556
320.85			4.939	0.9784	4.77	0.9349	5.103	0.9661	5.871	1.2373	5.667	1.173	5.407	1.0213	5.34	1.0148	4.013	1.1417
321.06			4.874	0.9655	4.761	0.9332	5.104	0.9663	5.768	1.2156	5.601	1.1594	5.388	1.0178	5.265	1.0006	4.026	1.1454
321.26			5.028	0.996	4.909	0.9622	5.166	0.978	5.823	1.2272	5.52	1.1426	5.295	1.0002	5.139	0.9766	4.001	1.1383
321.47			4.859	0.9626	4.888	0.9581	5.232	0.9905	5.751	1.212	5.367	1.111	5.249	0.9915	5.085	0.9664	3.942	1.1215
321.68			4.757	0.9424	4.744	0.9298	5.116	0.9686	5.687	1.1985	5.319	1.101	5.265	0.9945	4.972	0.9449	3.926	1.1169
321.88			4.932	0.977	4.785	0.9379	5.071	0.9601	5.793	1.2209	5.211	1.0787	5.194	0.9811	4.957	0.942	3.812	1.0845
322.09			4.819	0.9546	4.747	0.9304	5.054	0.9568	5.834	1.2295	5.261	1.089	5.083	0.9601	4.876	0.9266	3.731	1.0615
322.29			4.815	0.9538	4.691	0.9194	5.131	0.9714	5.703	1.2019	5.27	1.0909	5.039	0.9518	4.847	0.9211	3.752	1.0674
322.5			4.645	0.9202	4.682	0.9177	5.013	0.9491	5.576	1.1751	5.259	1.0886	5.033	0.9507	4.998	0.9498	3.915	1.1138
322.71			4.755	0.942	4.815	0.9437	4.881	0.9241	5.523	1.164	5.468	1.1319	5.23	0.9879	5.055	0.9607	4.05	1.1522
322.91			4.879	0.9665	4.88	0.9565	4.906	0.9288	5.602	1.1806	5.488	1.136	5.415	1.0229	5.203	0.9888	4.288	1.2199
323.12			4.889	0.9685	4.92	0.9643	5.072	0.9602	5.592	1.1785	5.412	1.1203	5.498	1.0385	5.139	0.9766	4.188	1.1915
323.32			5.019	0.9943	4.886	0.9577	5.17	0.9788	5.712	1.2038	5.448	1.1277	5.542	1.0468	5.175	0.9835	4.173	1.1872
323.53			4.986	0.9877	4.795	0.9398	5.075	0.9608	5.743	1.2103	5.368	1.1112	5.536	1.0457	5.248	0.9973	4.034	1.1477
323.74			5.262	1.0424	4.843	0.9492	5.112	0.9678	5.79	1.2202	5.394	1.1165	5.462	1.0317	5.297	1.0067	3.932	1.1186
323.94			5.408	1.0713	4.998	0.9796	5.074	0.9606	5.782	1.2185	5.419	1.1217	5.451	1.0297	5.3	1.0072	3.878	1.1033
324.15			5.378	1.0654	5.045	0.9888	5.115	0.9684	5.785	1.2192	5.633	1.166	5.582	1.0544	5.36	1.0186	4.018	1.1431
324.36			5.387	1.0672	5.178	1.0149	5.098	0.9652	5.813	1.2251	5.53	1.1447	5.585	1.055	5.333	1.0135	3.954	1.1249
324.56			5.529	1.0953	5.232	1.0255	5.265	0.9968	5.958	1.2556	5.47	1.1323	5.6	1.0578	5.323	1.0116	3.907	1.1115
324.77			5.631	1.1155	5.335	1.0457	5.413	1.0248	6.09	1.2835	5.363	1.1101	5.519	1.0425	5.199	0.988	3.812	1.0845
324.97			5.603	1.1099	5.182	1.0157	5.517	1.0445	6.122	1.2902	5.31	1.0992	5.483	1.0357	5.217	0.9914	3.707	1.0546
325.18			5.515	1.0925	5.094	0.9984	5.56	1.0526	6.121	1.29	5.274	1.0917	5.406	1.0212	5.227	0.9933	3.624	1.031
325.39			5.431	1.0759	4.935	0.9673	5.41	1.0242	6.039	1.2727	5.291	1.0952	5.489	1.0368	5.34	1.0148	3.637	1.0347
325.59			5.356	1.061	4.915	0.9633	5.384	1.0193	5.994	1.2632	5.208	1.078	5.338	1.0083	5.268	1.0011	3.508	0.998
325.8			5.22	1.0341	4.759	0.9328	5.281	0.9998	5.826	1.2278	5.283	1.0936	5.324	1.0057	5.311	1.0093	3.571	1.0159
326			5.072	1.0048	4.875	0.9555	5.284	1.0004	5.774	1.2169	5.228	1.0822	5.29	0.9992	5.202	0.9886	3.459	0.9841
326.21			4.995	0.9895	4.848	0.9502	5.364	1.0155	5.747	1.2112	5.258	1.0884	5.267	0.9949	5.289	1.0051	3.447	0.9807
326.42			4.954	0.9814	4.842	0.949	5.423	1.0267	5.667	1.1943	5.13	1.0619	5.196	0.9815	5.293	1.0059	3.427	0.975
326.62			4.863	0.9634	4.663	0.914	5.385	1.0195	5.595	1.1791	5.06	1.0474	5.208	0.9838	5.226	0.9932	3.407	0.9693
326.83			4.684	0.9279	4.628	0.9071	5.219	0.9881	5.417	1.1416	4.989	1.0327	5.187	0.9798	5.217	0.9914	3.489	0.9926
327.03			4.709	0.9328	4.561	0.894	5.145	0.9741	5.336	1.1246	5.071	1.0497	5.23	0.9879	5.255	0.9987	3.48	0.99
327.24			4.724	0.9358	4.598	0.9012	5.104	0.9663	5.406	1.1393	4.965	1.0277	5.282	0.9977	5.211	0.9903	3.418	0.9724
327.45			4.662	0.9235	4.672	0.9157	5.088	0.9633	5.389	1.1357	4.961	1.0269	5.242	0.9902	5.047	0.9591	3.432	0.9764
327.65			4.565	0.9043	4.69	0.9192	5.09	0.9637	5.406	1.1393	5.001	1.0352	5.042	0.9524	4.994	0.9491	3.408	0.9696
327.86			4.718	0.9346	4.761	0.9332	5.056	0.9572	5.416	1.1414	5.024	1.04	5.038	0.9516	4.962	0.943	3.435	0.9772
328.06			4.757	0.9424	4.931	0.9665	5.143	0.9737	5.565	1.1728	4.887	1.0116	4.975	0.9397	4.779	0.9082	3.341	0.9505
328.27			4.793	0.9495	4.821	0.9449	5.124	0.9701	5.537	1.1669	4.794	0.9923	4.98	0.9407	4.773	0.9071	3.428	0.9752
328.47			4.875	0.9657	4.889	0.9583	5.159	0.9767	5.606	1.1815	4.76	0.9853	4.975	0.9397	4.816	0.9152	3.414	0.9713
328.68			4.89	0.9687	4.784	0.9377	5.085	0.9627	5.628	1.1861	4.725	0.9781	4.946	0.9343	4.793	0.9109	3.358	0.9553
328.89			5.001	0.9907	4.929	0.9661	5.11	0.9674	5.682	1.1975	4.898	1.0139	5.061	0.956	4.879	0.9272	3.428	0.9752
329.09			5.003	0.9911	4.955	0.9712	5.173	0.9794	5.74	1.2097	4.909	1.0161	5.051	0.9541	4.888	0.9289	3.381	0.9619
329.3			4.932	0.977	4.954	0.971	5.159	0.9767	5.741	1.2099	4.941	1.0228	5.074	0.9584	4.904	0.932	3.478	0.9895
329.5			4.791	0.9491	4.913	0.963	5.082	0.9621	5.556	1.1709	4.97	1.0288	4.988	0.9422	4.898	0.9308	3.585	1.0199
329.71			4.832	0.9572	4.81	0.9428	4.992	0.9451	5.563	1.1724	5.095	1.0546	5.016	0.9475	5.062	0.962	3.567	1.0148
329.92			4.896	0.9699	4.852	0.951	4.982	0.9432	5.571	1.1741	5.093	1.0542	5.201	0.9824	5.084	0.9662	3.628	1.0321
330.12			4.8	0.9509	4.906	0.9616	5.12	0.9693	5.594	1.1789	5.097	1.0551	5.251	0.9919	5.111	0.9713	3.647	1.0376
330.33			4.939	0.9784	4.986	0.9773	5.057	0.9574	5.561	1.172	5.186	1.0735	5.333	1.0074	5.268	1.0011	3.77	1.0725
330.53			4.935	0.9776	4.997	0.9794	5.117	0.9688	5.644	1.1895	5.245	1.0857	5.371	1.0145	5.439	1.0336	3.869	1.1007
330.74			4.761	0.9431	4.961	0.9724	5.073	0.9604	5.601	1.1804	5.141	1.0642	5.397	1.0195	5.318	1.0106	3.841	1.0927
330.94			4.623	0.9158	4.984	0.9769	5.1	0.9655	5.455	1.1496	5.099	1.0555	5.419	1.0236	5.243	0.9964	3.871	1.1013
331.15			4.628	0.9168	4.94	0.9682	5.087	0.9631	5.321	1.1214	5.008	1.0366	5.504	1.0397	5.213	0.9907	3.852	1.0959
331.36			4.836	0.958	4.973	0.9747	5.074	0.9606	5.299	1.1168	5.044	1.0441	5.505	1.0399	5.221	0.9922	3.933	1.1189
331.56			5.013	0.9931	5.047	0.9892	5.113	0.968	5.4	1.138	5.026	1.0404	5.535	1.0455	5.197	0.9876	3.9	1.1095
331.77			5.067	1.0038	5.103	1.0002	5.128	0.9708	5.5	1.1591	5.038	1.0428	5.553	1.0489	5.119	0.9728	3.76	1.0697
331.97			5.107	1.0117	5.23	1.0251	5.265	0.9968	5.494	1.1579	4.958	1.0263	5.461	1.0315	5.072	0.9639	3.812	1.0845
332.18			5.236	1.0372	5.306	1.04	5.424	1.0269	5.608	1.1819	4.979	1.0306	5.43	1.0257	5.254	0.9985	3.952	1.1243
332.38			5.164	1.023	5.142	1.0078	5.291	1.0017	5.566	1.173	4.958	1.0263	5.451	1.0297	5.204	0.989	3.969	1.1292
332.59			5.067	1.0038	5.078	0.9953	5.408	1.0239	5.571	1.1741	4.994	1.0337	5.399	1.0198	5.204	0.989	3.864	1.0993
332.8			5.036	0.9976	4.98	0.9761	5.299	1.0032	5.393	1.1366	5.118	1.0594	5.544	1.0472	5.116	0.9723	3.873	1.1018
333			5.103	1.0109	4.909	0.9622	5.303	1.004	5.483	1.1555	5.26	1.0888	5.519	1.0425	5.223	0.9926	3.996	1.1368
333.21			5.232	1.0365	4.896	0.9596	5.326	1.0083	5.623	1.185	5.307	1.0985	5.57	1.0521	5.299	1.007	4.003	1.1388
333.41			5.253	1.0406	4.937	0.9677	5.367	1.0161	5.729	1.2074	5.342	1.1058	5.45	1.0295	5.383	1.023	4.059	1.1548
333.62			5.147	1.0196	5.038	0.9875	5.513	1.0437	5.736	1.2089	5.396	1.117	5.525	1.0436	5.363	1.0192	3.973	1.1303
333.82			5.091	1.0085	5.082	0.9961	5.522	1.0454	5.663	1.1935	5.415	1.1209	5.535	1.0455	5.415	1.0291	4.086	1.1624
334.03			5.117	1.0137	5.073	0.9943	5.595	1.0593	5.696	1.2004	5.433	1.1246	5.512	1.0412	5.591	1.0625	4.178	1.1886
334.24			5.111	1.0125	5.084	0.9965	5.55	1.0507	5.663	1.1935	5.44	1.1261	5.7	1.0767	5.562	1.057	4.197	1.194
334.44			4.959	0.9824	4.95	0.9702	5.44	1.0299	5.578	1.1756	5.336	1.1045	5.605	1.0587	5.419	1.0298	3.933	1.1189
334.65			4.894	0.9695	4.922	0.9647	5.375	1.0176	5.418	1.1418	5.304	1.0979	5.669	1.0708	5.661	1.0758	4.011	1.1411
334.85			4.875	0.9657	4.951	0.9704	5.334	1.0098	5.49	1.157	5.354	1.1083	5.68	1.0729	5.592	1.0627	4.064	1.1562
335.06			4.856	0.962	5.054	0.9906	5.391	1.0206	5.601	1.1804	5.324	1.102	5.523	1.0433	5.558	1.0563	4.01	1.1408
335.26			4.878	0.9663	5.058	0.9914	5.436	1.0292	5.601	1.1804	5.205	1.0774	5.509	1.0406	5.485	1.0424	3.886	1.1055
335.47			4.823	0.9554	5.163	1.012	5.436	1.0292	5.558	1.1713	5.243	1.0853	5.35	1.0106	5.324	1.0118	3.79	1.0782
335.68			4.771	0.9451	5.244	1.0278	5.448	1.0314	5.537	1.1669	5.202	1.0768	5.337	1.0081	5.312	1.0095	3.746	1.0657
335.88			4.8	0.9509	5.235	1.0261	5.355	1.0138	5.641	1.1888	5.264	1.0896	5.387	1.0176	5.346	1.016	3.737	1.0632
336.09			4.765	0.9439	5.208	1.0208	5.413	1.0248	5.672	1.1954	5.235	1.0836	5.245	0.9907	5.332	1.0133	3.54	1.0071
336.29			4.756	0.9422	5.206	1.0204	5.454	1.0326	5.695	1.2002	5.2	1.0764	5.222	0.9864	5.342	1.0152	3.518	1.0009
336.5			4.655	0.9221	5.177	1.0147	5.488	1.039	5.68	1.197	5.16	1.0681	5.203	0.9828	5.337	1.0143	3.448	0.9809
336.7			4.767	0.9443	5.297	1.0382	5.619	1.0638	5.708	1.203	5.188	1.0739	5.292	0.9996	5.32	1.011	3.539	1.0068
336.91			4.88	0.9667	5.369	1.0523	5.853	1.1081	5.871	1.2373	5.195	1.0753	5.221	0.9862	5.132	0.9753	3.574	1.0168
337.11			4.895	0.9697	5.521	1.0821	5.925	1.1217	5.809	1.2242	5.181	1.0724	5.2	0.9822	5.15	0.9787	3.569	1.0154
337.32			5.048	1	5.631	1.1037	5.956	1.1276	5.909	1.2453	5.196	1.0756	5.294	1	5.258	0.9992	3.542	1.0077
337.52			5.129	1.016	5.655	1.1084	5.965	1.1293	5.842	1.2312	5.187	1.0737	5.323	1.0055	5.227	0.9933	3.514	0.9997
337.73			5.149	1.02	5.63	1.1035	5.948	1.1261	5.837	1.2301	5.081	1.0517	5.445	1.0285	5.399	1.026	3.577	1.0176
337.94			5.118	1.0139	5.476	1.0733	5.887	1.1145	5.811	1.2247	5.159	1.0679	5.466	1.0325	5.381	1.0226	3.639	1.0353
338.14			5.122	1.0147	5.484	1.0749	5.941	1.1248	5.829	1.2285	5.149	1.0658	5.468	1.0329	5.455	1.0367	3.716	1.0572
338.35			5.014	0.9933	5.392	1.0568	5.822	1.1022	5.779	1.2179	5.142	1.0644	5.545	1.0474	5.404	1.027	3.801	1.0814
338.55			5.083	1.0069	5.458	1.0698	5.778	1.0939	5.714	1.2042	5.125	1.0609	5.505	1.0399	5.317	1.0105	3.685	1.0484
338.76			5.212	1.0325	5.436	1.0655	5.846	1.1068	5.748	1.2114	5.109	1.0575	5.501	1.0391	5.349	1.0165	3.693	1.0506
338.96			5.16	1.0222	5.413	1.061	5.753	1.0892	5.706	1.2025	5.187	1.0737	5.496	1.0382	5.415	1.0291	3.737	1.0632
339.17			5.121	1.0145	5.379	1.0543	5.62	1.064	5.655	1.1918	5.235	1.0836	5.467	1.0327	5.399	1.026	3.624	1.031
339.37			5.115	1.0133	5.173	1.0139	5.549	1.0505	5.61	1.1823	5.152	1.0664	5.495	1.038	5.338	1.0144	3.641	1.0358
339.58			4.977	0.9859	5.106	1.0008	5.462	1.0341	5.483	1.1555	5.085	1.0526	5.469	1.0331	5.257	0.999	3.631	1.033
339.78			4.77	0.9449	5.107	1.001	5.374	1.0174	5.521	1.1635	5.106	1.0569	5.333	1.0074	5.284	1.0042	3.671	1.0444
339.99			4.839	0.9586	5.099	0.9994	5.399	1.0222	5.653	1.1914	5.119	1.0596	5.204	0.983	5.242	0.9962	3.57	1.0156
340.2			4.853	0.9614	5.185	1.0163	5.247	0.9934	5.682	1.1975	5.105	1.0567	5.227	0.9873	5.267	1.001	3.444	0.9798
340.4			4.801	0.9511	5.059	0.9916	5.177	0.9801	5.681	1.1973	5.098	1.0553	5.176	0.9777	5.241	0.996	3.406	0.969
340.61			4.817	0.9542	5.026	0.9851	5.161	0.9771	5.704	1.2021	5.045	1.0443	5.203	0.9828	5.213	0.9907	3.323	0.9454
340.81			4.687	0.9285	4.963	0.9728	5.089	0.9635	5.625	1.1855	5.082	1.052	5.209	0.9839	5.249	0.9975	3.417	0.9721
341.02			4.626	0.9164	4.977	0.9755	4.995	0.9457	5.56	1.1718	5.063	1.048	5.183	0.979	5.238	0.9954	3.361	0.9562
341.22			4.782	0.9473	5.042	0.9882	5.154	0.9758	5.605	1.1812	4.995	1.0339	5.207	0.9836	5.173	0.9831	3.28	0.9331
341.43			4.856	0.962	5.046	0.989	5.112	0.9678	5.713	1.204	5.057	1.0468	5.247	0.9911	5.259	0.9994	3.353	0.9539
341.63			4.805	0.9519	5.094	0.9984	5.102	0.9659	5.712	1.2038	5.132	1.0623	5.277	0.9968	5.345	1.0158	3.357	0.955
341.84			4.852	0.9612	5.057	0.9912	5.167	0.9782	5.743	1.2103	5.204	1.0772	5.218	0.9856	5.302	1.0076	3.294	0.9371
342.04			4.988	0.9881	5.017	0.9833	5.268	0.9973	5.656	1.192	5.211	1.0787	5.226	0.9872	5.341	1.015	3.407	0.9693
342.25			4.879	0.9665	4.955	0.9712	5.273	0.9983	5.56	1.1718	5.275	1.0919	5.322	1.0053	5.399	1.026	3.468	0.9866
342.45			4.921	0.9748	4.926	0.9655	5.439	1.0297	5.569	1.1737	5.203	1.077	5.303	1.0017	5.401	1.0264	3.462	0.9849
342.66			4.908	0.9723	5.005	0.981	5.457	1.0331	5.516	1.1625	5.122	1.0602	5.302	1.0015	5.448	1.0353	3.478	0.9895
342.86			4.843	0.9594	5.104	1.0004	5.531	1.0471	5.516	1.1625	5.133	1.0625	5.256	0.9928	5.43	1.0319	3.517	1.0006
343.07			4.822	0.9552	5.069	0.9935	5.572	1.0549	5.617	1.1838	5.09	1.0536	5.288	0.9989	5.361	1.0188	3.568	1.0151
343.27			4.968	0.9842	5.092	0.998	5.655	1.0706	5.692	1.1996	5.103	1.0563	5.258	0.9932	5.405	1.0272	3.614	1.0282
343.48			4.977	0.9859	5.101	0.9998	5.629	1.0657	5.731	1.2078	5.077	1.0509	5.215	0.9851	5.378	1.022	3.731	1.0615
343.69			4.836	0.958	5.065	0.9927	5.603	1.0608	5.578	1.1756	5.101	1.0559	5.323	1.0055	5.455	1.0367	3.665	1.0427
343.89			4.878	0.9663	4.98	0.9761	5.682	1.0757	5.629	1.1863	5.114	1.0586	5.273	0.996	5.497	1.0447	3.67	1.0441
344.1			4.828	0.9564	4.929	0.9661	5.703	1.0797	5.611	1.1825	5.112	1.0582	5.314	1.0038	5.546	1.054	3.778	1.0748
344.3			4.758	0.9426	4.903	0.961	5.618	1.0636	5.536	1.1667	5.126	1.0611	5.353	1.0111	5.535	1.0519	3.727	1.0603
344.51			4.783	0.9475	4.881	0.9567	5.559	1.0524	5.503	1.1597	5.149	1.0658	5.372	1.0147	5.493	1.0439	3.785	1.0768
344.71			4.726	0.9362	4.931	0.9665	5.573	1.0551	5.477	1.1543	5.15	1.066	5.333	1.0074	5.447	1.0352	3.856	1.097
344.92			4.717	0.9344	4.918	0.9639	5.502	1.0417	5.493	1.1576	5.164	1.0689	5.322	1.0053	5.408	1.0277	3.843	1.0933
345.12			4.842	0.9592	4.858	0.9522	5.491	1.0396	5.52	1.1633	5.205	1.0774	5.336	1.0079	5.437	1.0333	3.779	1.0751
345.33			4.849	0.9606	4.813	0.9434	5.406	1.0235	5.463	1.1513	5.211	1.0787	5.386	1.0174	5.414	1.0289	3.783	1.0762
345.53			4.73	0.937	4.725	0.9261	5.343	1.0115	5.394	1.1368	5.245	1.0857	5.473	1.0338	5.488	1.0429	3.846	1.0942
345.74			4.636	0.9184	4.695	0.9202	5.344	1.0117	5.411	1.1404	5.206	1.0776	5.481	1.0353	5.51	1.0471	3.719	1.058
345.94			4.674	0.9259	4.828	0.9463	5.382	1.0189	5.472	1.1532	5.083	1.0522	5.365	1.0134	5.455	1.0367	3.699	1.0523
346.15			4.705	0.9321	4.898	0.96	5.302	1.0038	5.48	1.1549	5.047	1.0447	5.388	1.0178	5.455	1.0367	3.672	1.0447
346.35			4.774	0.9457	4.919	0.9641	5.357	1.0142	5.579	1.1758	4.994	1.0337	5.337	1.0081	5.446	1.035	3.706	1.0543
346.56			4.86	0.9628	5.008	0.9816	5.417	1.0256	5.73	1.2076	5.146	1.0652	5.418	1.0234	5.496	1.0445	3.687	1.0489
346.76			4.921	0.9748	5.03	0.9859	5.469	1.0354	5.713	1.204	5.188	1.0739	5.413	1.0225	5.57	1.0585	3.691	1.0501
346.97			4.964	0.9834	4.998	0.9796	5.553	1.0513	5.721	1.2057	5.206	1.0776	5.446	1.0287	5.545	1.0538	3.713	1.0563
347.17			5.083	1.0069	5.022	0.9843	5.601	1.0604	5.675	1.196	5.25	1.0867	5.406	1.0212	5.488	1.0429	3.756	1.0686
347.38			5.098	1.0099	5.15	1.0094	5.65	1.0697	5.709	1.2032	5.229	1.0824	5.351	1.0108	5.492	1.0437	3.833	1.0905
347.58			5.104	1.0111	5.171	1.0135	5.719	1.0827	5.673	1.1956	5.235	1.0836	5.287	0.9987	5.588	1.062	3.793	1.0791
347.79			5.054	1.0012	5.13	1.0055	5.65	1.0697	5.68	1.197	5.289	1.0948	5.191	0.9805	5.6	1.0642	3.74	1.064
347.99			5.037	0.9978	5.045	0.9888	5.554	1.0515	5.539	1.1673	5.341	1.1056	5.178	0.9781	5.608	1.0658	3.789	1.078
348.2			5.04	0.9984	4.964	0.973	5.54	1.0488	5.474	1.1536	5.368	1.1112	5.255	0.9926	5.582	1.0608	3.847	1.0945
348.4			5.047	0.9998	4.907	0.9618	5.588	1.0579	5.476	1.1541	5.327	1.1027	5.209	0.9839	5.359	1.0184	3.787	1.0774
348.61			5.003	0.9911	4.895	0.9594	5.533	1.0475	5.418	1.1418	5.408	1.1194	5.209	0.9839	5.428	1.0315	3.773	1.0734
348.81			4.891	0.9689	4.867	0.9539	5.474	1.0363	5.269	1.1104	5.297	1.0965	5.188	0.98	5.418	1.0296	3.842	1.093
349.02			4.866	0.9639	4.893	0.959	5.473	1.0362	5.279	1.1125	5.24	1.0847	5.202	0.9826	5.349	1.0165	3.887	1.1058
349.22			4.876	0.9659	4.965	0.9731	5.382	1.0189	5.348	1.1271	5.254	1.0876	5.17	0.9766	5.344	1.0156	3.841	1.0927
349.43			4.866	0.9639	4.95	0.9702	5.517	1.0445	5.426	1.1435	5.152	1.0664	5.203	0.9828	5.337	1.0143	3.749	1.0666
349.63			4.869	0.9645	4.932	0.9667	5.401	1.0225	5.346	1.1267	5.038	1.0428	5.189	0.9802	5.335	1.0139	3.672	1.0447
349.84			4.854	0.9616	4.999	0.9798	5.358	1.0144	5.374	1.1326	5.106	1.0569	5.242	0.9902	5.333	1.0135	3.701	1.0529
350.04			4.964	0.9834	5.042	0.9882	5.435	1.029	5.366	1.1309	5.081	1.0517	5.216	0.9853	5.165	0.9816	3.688	1.0492
350.25			5.01	0.9925	5.099	0.9994	5.556	1.0519	5.467	1.1522	5.089	1.0534	5.171	0.9768	5.087	0.9667	3.648	1.0378
350.45			5.072	1.0048	5.076	0.9949	5.638	1.0674	5.547	1.169	5.128	1.0615	5.161	0.9749	5.186	0.9856	3.687	1.0489
350.66			4.99	0.9885	5.038	0.9875	5.48	1.0375	5.432	1.1448	5.142	1.0644	5.267	0.9949	5.323	1.0116	3.715	1.0569
350.86			5.021	0.9947	5.159	1.0112	5.454	1.0326	5.427	1.1437	5.055	1.0464	5.275	0.9964	5.245	0.9968	3.562	1.0134
351.07			5.051	1.0006	5.095	0.9986	5.492	1.0398	5.495	1.1581	5.063	1.048	5.219	0.9858	5.166	0.9818	3.537	1.0063
351.27			5.036	0.9976	5.149	1.0092	5.499	1.0411	5.563	1.1724	5.116	1.059	5.289	0.9991	5.198	0.9878	3.438	0.9781
351.48			5.025	0.9954	5.09	0.9976	5.385	1.0195	5.473	1.1534	5.038	1.0428	5.301	1.0013	5.182	0.9848	3.426	0.9747
351.68			4.954	0.9814	4.97	0.9741	5.162	0.9773	5.379	1.1336	5.205	1.0774	5.404	1.0208	5.275	1.0025	3.498	0.9952
351.89			4.955	0.9816	4.798	0.9404	5.197	0.9839	5.296	1.1161	5.312	1.0996	5.498	1.0385	5.303	1.0078	3.597	1.0233
352.09			5.016	0.9937	4.803	0.9414	5.3	1.0034	5.353	1.1281	5.258	1.0884	5.423	1.0244	5.298	1.0068	3.567	1.0148
352.3			5.035	0.9974	4.853	0.9512	5.255	0.9949	5.355	1.1286	5.174	1.071	5.455	1.0304	5.408	1.0277	3.489	0.9926
352.5			4.984	0.9873	4.809	0.9426	5.115	0.9684	5.18	1.0917	5.175	1.0712	5.475	1.0342	5.515	1.0481	3.497	0.9949
352.71			4.99	0.9885	4.733	0.9277	4.969	0.9407	5.091	1.0729	5.104	1.0565	5.444	1.0283	5.375	1.0215	3.448	0.9809
352.91			4.976	0.9857	4.772	0.9353	5	0.9466	5.185	1.0927	5.168	1.0698	5.404	1.0208	5.5	1.0452	3.546	1.0088
353.11			4.962	0.983	4.648	0.911	4.93	0.9334	5.088	1.0723	5.203	1.077	5.455	1.0304	5.544	1.0536	3.689	1.0495
353.32			4.954	0.9814	4.653	0.912	4.913	0.9301	5.08	1.0706	5.149	1.0658	5.509	1.0406	5.577	1.0599	3.608	1.0265
353.52			4.985	0.9875	4.625	0.9065	4.908	0.9292	5.021	1.0582	5.075	1.0505	5.393	1.0187	5.491	1.0435	3.678	1.0464
353.73			4.986	0.9877	4.685	0.9183	5.029	0.9521	5.117	1.0784	5.09	1.0536	5.417	1.0232	5.582	1.0608	3.721	1.0586
353.93			4.978	0.9861	4.698	0.9208	5.106	0.9667	5.124	1.0799	4.988	1.0325	5.339	1.0085	5.43	1.0319	3.647	1.0376
354.14			4.968	0.9842	4.72	0.9251	5.019	0.9502	5.148	1.0849	4.922	1.0188	5.309	1.0028	5.354	1.0175	3.582	1.0191
354.34			4.93	0.9766	4.702	0.9216	4.963	0.9396	5.091	1.0729	4.845	1.0029	5.415	1.0229	5.312	1.0095	3.539	1.0068
354.55			4.885	0.9677	4.685	0.9183	4.982	0.9432	5.148	1.0849	4.846	1.0031	5.355	1.0115	5.163	0.9812	3.579	1.0182
354.75			4.936	0.9778	4.779	0.9367	5.025	0.9513	5.244	1.1052	4.901	1.0145	5.395	1.0191	5.12	0.973	3.72	1.0583
354.96			4.961	0.9828	4.943	0.9688	5.133	0.9718	5.317	1.1205	4.91	1.0164	5.417	1.0232	5.205	0.9892	3.76	1.0697
355.16			5.075	1.0053	4.946	0.9694	5.18	0.9807	5.284	1.1136	4.837	1.0012	5.352	1.011	5.099	0.969	3.629	1.0324
355.37			5.023	0.995	4.951	0.9704	5.243	0.9926	5.376	1.133	4.848	1.0035	5.369	1.0142	5.058	0.9612	3.579	1.0182
355.57			5.027	0.9958	5.067	0.9931	5.273	0.9983	5.331	1.1235	4.876	1.0093	5.419	1.0236	5.082	0.9658	3.591	1.0216
355.78			5.022	0.9948	5.067	0.9931	5.297	1.0028	5.359	1.1294	4.847	1.0033	5.405	1.021	5.09	0.9673	3.556	1.0117
355.98			5.044	0.9992	4.977	0.9755	5.231	0.9903	5.276	1.1119	4.906	1.0155	5.357	1.0119	5.06	0.9616	3.521	1.0017
356.19			4.992	0.9889	5.001	0.9802	5.185	0.9816	5.268	1.1102	4.899	1.0141	5.373	1.0149	5.132	0.9753	3.565	1.0142
356.39			4.955	0.9816	5.066	0.9929	5.28	0.9996	5.28	1.1128	4.993	1.0335	5.369	1.0142	5.177	0.9838	3.655	1.0398
356.59			4.912	0.9731	5.07	0.9937	5.228	0.9898	5.293	1.1155	5.08	1.0515	5.331	1.007	5.18	0.9844	3.678	1.0464
356.8			4.944	0.9794	5.121	1.0037	5.339	1.0108	5.282	1.1132	5.104	1.0565	5.331	1.007	5.253	0.9983	3.713	1.0563
357			4.85	0.9608	5.054	0.9906	5.352	1.0133	5.228	1.1018	5.018	1.0387	5.285	0.9983	5.24	0.9958	3.511	0.9989
357.21			4.813	0.9534	4.953	0.9708	5.367	1.0161	5.168	1.0891	5.058	1.047	5.304	1.0019	5.247	0.9971	3.521	1.0017
357.41			4.778	0.9465	4.987	0.9775	5.418	1.0257	5.094	1.0736	5.118	1.0594	5.336	1.0079	5.311	1.0093	3.579	1.0182
357.62			4.806	0.9521	5.059	0.9916	5.453	1.0324	5.057	1.0658	5.122	1.0602	5.326	1.006	5.338	1.0144	3.575	1.0171
357.82			4.897	0.9701	5.029	0.9857	5.458	1.0333	5.048	1.0639	5.15	1.066	5.277	0.9968	5.31	1.0091	3.558	1.0122
358.03			4.857	0.9622	4.997	0.9794	5.426	1.0273	5.039	1.062	5.151	1.0662	5.307	1.0025	5.367	1.02	3.542	1.0077
358.23			4.836	0.958	5.026	0.9851	5.483	1.0381	4.996	1.0529	5.137	1.0633	5.296	1.0004	5.379	1.0222	3.561	1.0131
358.44			4.887	0.9681	5.073	0.9943	5.488	1.039	5.001	1.054	5.128	1.0615	5.286	0.9985	5.421	1.0302	3.552	1.0105
358.64			4.887	0.9681	5.084	0.9965	5.495	1.0403	4.97	1.0474	5.107	1.0571	5.319	1.0047	5.395	1.0253	3.515	1
358.84			4.941	0.9788	5.084	0.9965	5.522	1.0454	4.984	1.0504	5.098	1.0553	5.301	1.0013	5.418	1.0296	3.53	1.0043
359.05			4.828	0.9564	4.972	0.9745	5.353	1.0134	4.92	1.0369	5.101	1.0559	5.379	1.0161	5.42	1.03	3.547	1.0091
359.25			4.86	0.9628	4.959	0.972	5.317	1.0066	4.904	1.0335	5.079	1.0513	5.389	1.0179	5.425	1.031	3.678	1.0464
359.46			4.867	0.9641	5.058	0.9914	5.299	1.0032	4.95	1.0432	5.158	1.0677	5.479	1.0349	5.389	1.0241	3.689	1.0495
359.66			4.818	0.9544	5.048	0.9894	5.251	0.9941	4.969	1.0472	5.147	1.0654	5.494	1.0378	5.364	1.0194	3.688	1.0492
359.87			4.888	0.9683	5.085	0.9967	5.222	0.9886	4.985	1.0506	5.151	1.0662	5.475	1.0342	5.344	1.0156	3.736	1.0629
360.07			4.802	0.9513	5.042	0.9882	5.171	0.979	5.045	1.0632	5.063	1.048	5.443	1.0281	5.349	1.0165	3.774	1.0737
360.28			4.806	0.9521	5.044	0.9886	5.158	0.9765	4.989	1.0514	5.067	1.0489	5.416	1.023	5.341	1.015	3.748	1.0663
360.48			4.805	0.9519	5.021	0.9841	5.18	0.9807	5.023	1.0586	5.069	1.0493	5.485	1.0361	5.357	1.0181	3.792	1.0788
360.68			4.868	0.9643	5.062	0.9922	5.289	1.0013	5.114	1.0778	5.063	1.048	5.45	1.0295	5.255	0.9987	3.791	1.0785
360.89			4.824	0.9556	5	0.98	5.258	0.9955	5.136	1.0824	5.047	1.0447	5.394	1.0189	5.291	1.0055	3.786	1.0771
361.09			4.802	0.9513	4.98	0.9761	5.271	0.9979	5.12	1.079	4.98	1.0308	5.36	1.0125	5.272	1.0019	3.773	1.0734
361.3			4.853	0.9614	5.059	0.9916	5.356	1.014	5.191	1.094	5.029	1.041	5.341	1.0089	5.298	1.0068	3.73	1.0612
361.5			4.867	0.9641	5.117	1.0029	5.376	1.0178	5.244	1.1052	5.066	1.0486	5.309	1.0028	5.325	1.012	3.753	1.0677
361.71			4.906	0.9719	5.086	0.9969	5.378	1.0182	5.236	1.1035	5.045	1.0443	5.248	0.9913	5.386	1.0236	3.756	1.0686
361.91			4.911	0.9729	5.119	1.0033	5.427	1.0275	5.3	1.117	5.066	1.0486	5.272	0.9958	5.389	1.0241	3.735	1.0626
362.12			4.903	0.9713	5.008	0.9816	5.439	1.0297	5.318	1.1208	5.015	1.0381	5.302	1.0015	5.354	1.0175	3.661	1.0415
362.32			4.914	0.9735	5.06	0.9918	5.5	1.0413	5.314	1.1199	4.99	1.0329	5.314	1.0038	5.345	1.0158	3.616	1.0287
362.52			4.942	0.979	5.078	0.9953	5.495	1.0403	5.378	1.1334	5.01	1.0371	5.332	1.0072	5.317	1.0105	3.579	1.0182
362.73			4.947	0.98	5.101	0.9998	5.437	1.0293	5.395	1.137	4.977	1.0302	5.3	1.0011	5.327	1.0124	3.544	1.0083
362.93			4.943	0.9792	5.092	0.998	5.416	1.0254	5.379	1.1336	5.006	1.0362	5.331	1.007	5.41	1.0281	3.514	0.9997
363.14			5.043	0.999	5.137	1.0069	5.479	1.0373	5.388	1.1355	4.999	1.0348	5.321	1.0051	5.405	1.0272	3.488	0.9923
363.34			5.078	1.0059	5.214	1.022	5.52	1.0451	5.427	1.1437	5.037	1.0426	5.396	1.0193	5.445	1.0348	3.545	1.0085
363.55			5.099	1.0101	5.223	1.0237	5.494	1.0401	5.419	1.142	5.005	1.036	5.403	1.0206	5.474	1.0403	3.565	1.0142
363.75			5.062	1.0028	5.21	1.0212	5.484	1.0382	5.347	1.1269	5.016	1.0383	5.403	1.0206	5.454	1.0365	3.519	1.0011
363.95			5.023	0.995	5.208	1.0208	5.477	1.0369	5.349	1.1273	4.939	1.0224	5.376	1.0155	5.405	1.0272	3.475	0.9886
364.16			5.077	1.0057	5.195	1.0182	5.46	1.0337	5.376	1.133	4.923	1.019	5.373	1.0149	5.424	1.0308	3.474	0.9883
364.36			5.031	0.9966	5.264	1.0318	5.442	1.0303	5.293	1.1155	4.956	1.0259	5.279	0.9972	5.443	1.0344	3.479	0.9898
364.57			4.997	0.9899	5.239	1.0269	5.406	1.0235	5.22	1.1001	5.013	1.0377	5.26	0.9936	5.438	1.0334	3.44	0.9787
364.77			4.976	0.9857	5.233	1.0257	5.404	1.0231	5.188	1.0934	5.032	1.0416	5.276	0.9966	5.521	1.0492	3.56	1.0128
364.98			4.999	0.9903	5.235	1.0261	5.443	1.0305	5.172	1.09	5.007	1.0364	5.292	0.9996	5.485	1.0424	3.534	1.0054
365.18			4.951	0.9808	5.21	1.0212	5.425	1.0271	5.087	1.0721	4.964	1.0275	5.262	0.994	5.446	1.035	3.532	1.0048
365.38			4.946	0.9798	5.277	1.0343	5.353	1.0134	5.051	1.0645	4.911	1.0166	5.266	0.9947	5.397	1.0257	3.508	0.998
365.59			4.949	0.9804	5.204	1.02	5.324	1.008	4.971	1.0476	4.901	1.0145	5.209	0.9839	5.353	1.0173	3.497	0.9949
365.79			4.931	0.9768	5.2	1.0192	5.253	0.9945	4.904	1.0335	4.922	1.0188	5.209	0.9839	5.341	1.015	3.501	0.996
366			4.969	0.9844	5.158	1.011	5.267	0.9972	4.98	1.0495	4.914	1.0172	5.287	0.9987	5.407	1.0276	3.503	0.9966
366.2			4.955	0.9816	5.126	1.0047	5.245	0.993	5	1.0537	4.967	1.0282	5.271	0.9957	5.333	1.0135	3.526	1.0031
366.41			4.931	0.9768	5.074	0.9945	5.19	0.9826	4.897	1.032	4.966	1.0279	5.219	0.9858	5.284	1.0042	3.565	1.0142
366.61			4.98	0.9865	5.061	0.992	5.263	0.9964	5.011	1.0561	4.971	1.029	5.335	1.0077	5.295	1.0063	3.637	1.0347
366.81			5.04	0.9984	5.071	0.9939	5.277	0.9991	5.066	1.0677	4.981	1.031	5.385	1.0172	5.309	1.0089	3.759	1.0694
367.02			5.036	0.9976	4.981	0.9763	5.229	0.99	5.093	1.0733	4.925	1.0195	5.391	1.0183	5.253	0.9983	3.667	1.0432
367.22			5.041	0.9986	4.971	0.9743	5.215	0.9873	5.1	1.0748	5.046	1.0445	5.33	1.0068	5.267	1.001	3.713	1.0563
367.43			4.966	0.9838	4.955	0.9712	5.125	0.9703	5.103	1.0754	5.116	1.059	5.357	1.0119	5.282	1.0038	3.761	1.07
367.63			4.966	0.9838	4.917	0.9637	5.21	0.9864	5.193	1.0944	5.149	1.0658	5.42	1.0238	5.351	1.0169	3.808	1.0834
367.83			4.911	0.9729	4.943	0.9688	5.199	0.9843	5.268	1.1102	5.277	1.0923	5.472	1.0336	5.435	1.0329	3.798	1.0805
368.04			4.939	0.9784	4.962	0.9726	5.273	0.9983	5.322	1.1216	5.3	1.0971	5.515	1.0417	5.421	1.0302	3.799	1.0808
368.24			4.969	0.9844	4.999	0.9798	5.295	1.0025	5.343	1.126	5.296	1.0963	5.427	1.0251	5.406	1.0274	3.818	1.0862
368.45			4.928	0.9762	5	0.98	5.248	0.9936	5.292	1.1153	5.217	1.0799	5.436	1.0268	5.43	1.0319	3.809	1.0836
368.65			5.032	0.9968	5.135	1.0065	5.339	1.0108	5.419	1.142	5.144	1.0648	5.468	1.0329	5.442	1.0342	3.712	1.056
368.85			5.064	1.0032	5.143	1.008	5.223	0.9888	5.354	1.1283	5.165	1.0691	5.421	1.024	5.386	1.0236	3.68	1.0469
369.06			5.047	0.9998	5.126	1.0047	5.198	0.9841	5.352	1.1279	5.137	1.0633	5.476	1.0344	5.414	1.0289	3.648	1.0378
369.26			5.097	1.0097	5.229	1.0249	5.285	1.0006	5.341	1.1256	5.175	1.0712	5.427	1.0251	5.399	1.026	3.722	1.0589
369.47			5.084	1.0071	5.283	1.0355	5.262	0.9962	5.322	1.1216	5.025	1.0402	5.435	1.0266	5.356	1.0179	3.662	1.0418
369.67			5.258	1.0416	5.37	1.0525	5.381	1.0187	5.448	1.1482	4.99	1.0329	5.416	1.023	5.352	1.0171	3.626	1.0316
369.87			5.266	1.0432	5.33	1.0447	5.276	0.9989	5.373	1.1323	5.003	1.0356	5.403	1.0206	5.381	1.0226	3.63	1.0327
370.08			5.291	1.0481	5.297	1.0382	5.235	0.9911	5.293	1.1155	4.886	1.0114	5.412	1.0223	5.312	1.0095	3.585	1.0199
370.28			5.227	1.0355	5.295	1.0378	5.2	0.9845	5.206	1.0972	4.807	0.995	5.349	1.0104	5.301	1.0074	3.552	1.0105
370.49			5.291	1.0481	5.292	1.0372	5.18	0.9807	5.188	1.0934	4.883	1.0108	5.444	1.0283	5.302	1.0076	3.577	1.0176
370.69			5.388	1.0674	5.316	1.0419	5.313	1.0059	5.207	1.0974	4.953	1.0253	5.455	1.0304	5.354	1.0175	3.534	1.0054
370.89			5.285	1.0469	5.234	1.0259	5.254	0.9947	5.141	1.0835	5.065	1.0484	5.491	1.0372	5.424	1.0308	3.69	1.0498
371.1			5.264	1.0428	5.233	1.0257	5.279	0.9994	5.132	1.0816	5.068	1.0491	5.477	1.0346	5.506	1.0464	3.673	1.045
371.3			5.281	1.0462	5.272	1.0333	5.294	1.0023	5.168	1.0891	5.045	1.0443	5.416	1.023	5.474	1.0403	3.663	1.0421
371.51			5.211	1.0323	5.284	1.0357	5.307	1.0047	5.133	1.0818	5.049	1.0451	5.442	1.028	5.487	1.0428	3.622	1.0304
371.71			5.159	1.022	5.199	1.019	5.246	0.9932	5.065	1.0674	5.142	1.0644	5.476	1.0344	5.523	1.0496	3.668	1.0435
371.91			5.114	1.0131	5.161	1.0116	5.198	0.9841	5.022	1.0584	5.13	1.0619	5.484	1.0359	5.56	1.0566	3.71	1.0555
372.12			5.065	1.0034	5.223	1.0237	5.127	0.9707	5.015	1.0569	5.172	1.0706	5.509	1.0406	5.509	1.0469	3.724	1.0595
372.32			5.098	1.0099	5.199	1.019	5.129	0.971	5.019	1.0577	5.146	1.0652	5.419	1.0236	5.472	1.0399	3.729	1.0609
372.53			5.084	1.0071	5.141	1.0076	5.113	0.968	5.047	1.0636	5.115	1.0588	5.354	1.0113	5.448	1.0353	3.75	1.0669
372.73			5.042	0.9988	5.187	1.0167	5.073	0.9604	5.085	1.0717	5.089	1.0534	5.352	1.011	5.399	1.026	3.712	1.056
372.93			5.029	0.9962	5.18	1.0153	5.036	0.9534	5.174	1.0904	5.084	1.0524	5.366	1.0136	5.375	1.0215	3.706	1.0543
373.14			5.032	0.9968	5.206	1.0204	5.001	0.9468	5.169	1.0894	5.047	1.0447	5.337	1.0081	5.291	1.0055	3.656	1.0401
373.34			5.022	0.9948	5.25	1.029	5.023	0.951	5.168	1.0891	5.018	1.0387	5.338	1.0083	5.247	0.9971	3.708	1.0549
373.54			5.038	0.998	5.248	1.0286	5.064	0.9587	5.128	1.0807	5.025	1.0402	5.289	0.9991	5.194	0.9871	3.615	1.0284
373.75			4.984	0.9873	5.16	1.0114	4.983	0.9434	5.115	1.078	5.073	1.0501	5.322	1.0053	5.258	0.9992	3.63	1.0327
373.95			4.965	0.9836	5.148	1.009	5.005	0.9476	5.163	1.0881	5.035	1.0422	5.304	1.0019	5.26	0.9996	3.57	1.0156
374.16			4.988	0.9881	5.058	0.9914	5.069	0.9597	5.091	1.0729	5.029	1.041	5.303	1.0017	5.283	1.004	3.508	0.998
374.36			4.945	0.9796	4.999	0.9798	5.177	0.9801	5.06	1.0664	5.01	1.0371	5.293	0.9998	5.323	1.0116	3.464	0.9855
374.56			4.852	0.9612	4.944	0.969	5.197	0.9839	5.056	1.0655	4.961	1.0269	5.239	0.9896	5.381	1.0226	3.409	0.9698
374.77			4.888	0.9683	4.993	0.9786	5.26	0.9958	5.066	1.0677	5.017	1.0385	5.297	1.0006	5.399	1.026	3.416	0.9718
374.97			4.867	0.9641	4.93	0.9663	5.32	1.0072	4.966	1.0466	4.982	1.0313	5.26	0.9936	5.439	1.0336	3.373	0.9596
375.17			4.802	0.9513	4.935	0.9673	5.278	0.9992	4.852	1.0226	5.018	1.0387	5.267	0.9949	5.487	1.0428	3.436	0.9775
375.38			4.856	0.962	4.938	0.9679	5.377	1.018	4.874	1.0272	4.985	1.0319	5.243	0.9904	5.524	1.0498	3.414	0.9713
375.58			4.806	0.9521	4.872	0.9549	5.285	1.0006	4.864	1.0251	4.988	1.0325	5.276	0.9966	5.531	1.0511	3.385	0.963
375.79			4.839	0.9586	4.874	0.9553	5.281	0.9998	4.924	1.0377	5.017	1.0385	5.318	1.0045	5.542	1.0532	3.452	0.9821
375.99			4.945	0.9796	5.004	0.9808	5.35	1.0129	5.006	1.055	4.97	1.0288	5.263	0.9941	5.466	1.0388	3.427	0.975
376.19			4.958	0.9822	5.09	0.9976	5.409	1.024	5.055	1.0653	4.997	1.0344	5.306	1.0023	5.487	1.0428	3.431	0.9761
376.4			4.924	0.9754	5.198	1.0188	5.381	1.0187	5.08	1.0706	5.027	1.0406	5.343	1.0093	5.417	1.0295	3.471	0.9875
376.6			4.943	0.9792	5.172	1.0137	5.363	1.0153	5.12	1.079	5.005	1.036	5.313	1.0036	5.422	1.0304	3.484	0.9912
376.8			5.051	1.0006	5.313	1.0414	5.433	1.0286	5.178	1.0913	5.103	1.0563	5.429	1.0255	5.488	1.0429	3.575	1.0171
377.01			5.011	0.9927	5.287	1.0363	5.459	1.0335	5.18	1.0917	5.122	1.0602	5.481	1.0353	5.506	1.0464	3.626	1.0316
377.21			4.985	0.9875	5.315	1.0417	5.43	1.028	5.209	1.0978	5.09	1.0536	5.48	1.0351	5.466	1.0388	3.668	1.0435
377.42			5.06	1.0024	5.302	1.0392	5.438	1.0295	5.202	1.0963	5.08	1.0515	5.473	1.0338	5.457	1.0371	3.67	1.0441
377.62			5.033	0.997	5.32	1.0427	5.387	1.0199	5.207	1.0974	5.082	1.052	5.501	1.0391	5.437	1.0333	3.694	1.0509
377.82			5.03	0.9964	5.337	1.0461	5.469	1.0354	5.196	1.095	5.054	1.0462	5.482	1.0355	5.457	1.0371	3.666	1.043
378.03			5.012	0.9929	5.329	1.0445	5.469	1.0354	5.186	1.0929	5.077	1.0509	5.501	1.0391	5.496	1.0445	3.714	1.0566
378.23			4.958	0.9822	5.26	1.031	5.409	1.024	5.103	1.0754	5.12	1.0598	5.567	1.0516	5.524	1.0498	3.742	1.0646
378.43			4.974	0.9853	5.154	1.0102	5.417	1.0256	5.073	1.0691	5.14	1.064	5.549	1.0482	5.535	1.0519	3.767	1.0717
378.64			4.968	0.9842	5.086	0.9969	5.414	1.025	5.075	1.0695	5.147	1.0654	5.517	1.0421	5.588	1.062	3.752	1.0674
378.84			5.014	0.9933	5.085	0.9967	5.372	1.017	5	1.0537	5.12	1.0598	5.557	1.0497	5.561	1.0568	3.75	1.0669
379.04			4.963	0.9832	5.072	0.9941	5.307	1.0047	4.972	1.0478	5.029	1.041	5.507	1.0402	5.506	1.0464	3.701	1.0529
379.25			4.981	0.9867	5.086	0.9969	5.253	0.9945	4.95	1.0432	4.998	1.0346	5.42	1.0238	5.445	1.0348	3.617	1.029
379.45			5.03	0.9964	5.09	0.9976	5.241	0.9922	4.944	1.0419	5.067	1.0489	5.436	1.0268	5.473	1.0401	3.613	1.0279
379.65			4.976	0.9857	5.073	0.9943	5.205	0.9854	4.929	1.0388	5.032	1.0416	5.4	1.02	5.463	1.0382	3.563	1.0137
379.86			4.997	0.9899	5.03	0.9859	5.24	0.992	4.92	1.0369	5.037	1.0426	5.391	1.0183	5.495	1.0443	3.552	1.0105
380.06			4.999	0.9903	4.981	0.9763	5.183	0.9813	4.883	1.0291	5.066	1.0486	5.357	1.0119	5.468	1.0391	3.551	1.0102
380.27			5.015	0.9935	4.954	0.971	5.171	0.979	4.858	1.0238	4.987	1.0323	5.287	0.9987	5.431	1.0321	3.527	1.0034
380.47			4.986	0.9877	4.986	0.9773	5.221	0.9885	4.87	1.0263	4.939	1.0224	5.27	0.9955	5.406	1.0274	3.495	0.9943
380.67			4.992	0.9889	5.05	0.9898	5.2	0.9845	4.936	1.0403	4.918	1.018	5.311	1.0032	5.403	1.0268	3.526	1.0031
380.88			4.965	0.9836	5.02	0.9839	5.17	0.9788	4.934	1.0398	4.883	1.0108	5.295	1.0002	5.392	1.0247	3.48	0.99
381.08			4.961	0.9828	5.086	0.9969	5.247	0.9934	5.032	1.0605	4.931	1.0207	5.274	0.9962	5.409	1.0279	3.474	0.9883
381.28			4.959	0.9824	5.002	0.9804	5.204	0.9852	4.961	1.0455	5.008	1.0366	5.296	1.0004	5.434	1.0327	3.491	0.9932
381.49			4.968	0.9842	5.003	0.9806	5.236	0.9913	4.941	1.0413	5.064	1.0482	5.37	1.0144	5.496	1.0445	3.527	1.0034
381.69			4.876	0.9659	4.947	0.9696	5.238	0.9917	4.935	1.04	5.008	1.0366	5.366	1.0136	5.439	1.0336	3.532	1.0048
381.89			4.847	0.9602	4.925	0.9653	5.243	0.9926	4.905	1.0337	5.002	1.0354	5.364	1.0132	5.456	1.0369	3.563	1.0137
382.1			4.812	0.9532	4.934	0.9671	5.178	0.9803	4.856	1.0234	4.984	1.0317	5.348	1.0102	5.403	1.0268	3.503	0.9966
382.3			4.871	0.9649	5	0.98	5.259	0.9956	4.928	1.0386	4.96	1.0267	5.39	1.0181	5.367	1.02	3.536	1.006
382.5			4.78	0.9469	5.012	0.9824	5.206	0.9856	4.898	1.0322	4.991	1.0331	5.423	1.0244	5.363	1.0192	3.534	1.0054
382.71			4.837	0.9582	5.018	0.9835	5.184	0.9814	4.908	1.0344	4.998	1.0346	5.388	1.0178	5.393	1.0249	3.547	1.0091
382.91			4.793	0.9495	4.982	0.9765	5.204	0.9852	4.836	1.0192	4.935	1.0215	5.321	1.0051	5.338	1.0144	3.493	0.9937
383.11			4.787	0.9483	4.997	0.9794	5.16	0.9769	4.824	1.0166	4.967	1.0282	5.363	1.013	5.346	1.016	3.557	1.0119
383.32			4.737	0.9384	4.95	0.9702	5.098	0.9652	4.77	1.0053	4.931	1.0207	5.36	1.0125	5.319	1.0108	3.516	1.0003
383.52			4.732	0.9374	4.957	0.9716	5.17	0.9788	4.787	1.0089	4.899	1.0141	5.383	1.0168	5.245	0.9968	3.505	0.9972
383.72			4.744	0.9398	4.954	0.971	5.168	0.9784	4.812	1.0141	4.885	1.0112	5.392	1.0185	5.205	0.9892	3.512	0.9991
383.93			4.812	0.9532	5.006	0.9812	5.205	0.9854	4.86	1.0242	4.868	1.0077	5.379	1.0161	5.219	0.9918	3.533	1.0051
384.13			4.81	0.9529	5.058	0.9914	5.231	0.9903	4.898	1.0322	4.853	1.0046	5.346	1.0098	5.18	0.9844	3.522	1.002
384.33			4.783	0.9475	5.009	0.9818	5.241	0.9922	4.906	1.0339	4.865	1.007	5.322	1.0053	5.185	0.9854	3.537	1.0063
384.54			4.725	0.936	4.982	0.9765	5.218	0.9879	4.889	1.0303	4.913	1.017	5.307	1.0025	5.228	0.9935	3.576	1.0174
384.74			4.782	0.9473	4.941	0.9684	5.237	0.9915	4.877	1.0278	4.898	1.0139	5.33	1.0068	5.271	1.0017	3.578	1.0179
384.94			4.799	0.9507	4.915	0.9633	5.258	0.9955	4.857	1.0236	4.833	1.0004	5.32	1.0049	5.25	0.9977	3.564	1.0139
385.15			4.88	0.9667	4.905	0.9614	5.282	1	4.876	1.0276	4.882	1.0106	5.319	1.0047	5.256	0.9989	3.598	1.0236
385.35			4.873	0.9653	4.915	0.9633	5.285	1.0006	4.9	1.0327	4.811	0.9959	5.316	1.0042	5.216	0.9913	3.532	1.0048
385.55			4.859	0.9626	4.927	0.9657	5.363	1.0153	4.953	1.0438	4.796	0.9928	5.318	1.0045	5.245	0.9968	3.588	1.0208
385.76			4.895	0.9697	4.958	0.9718	5.355	1.0138	5.002	1.0542	4.805	0.9946	5.297	1.0006	5.281	1.0036	3.601	1.0245
385.96			4.87	0.9647	4.951	0.9704	5.386	1.0197	5.015	1.0569	4.751	0.9834	5.226	0.9872	5.272	1.0019	3.535	1.0057
386.16			4.866	0.9639	4.973	0.9747	5.4	1.0223	5.057	1.0658	4.785	0.9905	5.253	0.9923	5.285	1.0044	3.505	0.9972
386.37			4.873	0.9653	4.97	0.9741	5.366	1.0159	5.039	1.062	4.801	0.9938	5.31	1.003	5.227	0.9933	3.499	0.9954
386.57			4.881	0.9669	4.976	0.9753	5.396	1.0216	5.044	1.063	4.74	0.9812	5.312	1.0034	5.221	0.9922	3.484	0.9912
386.77			4.872	0.9651	4.995	0.979	5.415	1.0252	5.055	1.0653	4.711	0.9752	5.324	1.0057	5.22	0.992	3.399	0.967
386.98			4.844	0.9596	5.003	0.9806	5.428	1.0276	5.049	1.0641	4.713	0.9756	5.291	0.9994	5.203	0.9888	3.349	0.9528
387.18			4.815	0.9538	4.983	0.9767	5.463	1.0343	5.044	1.063	4.785	0.9905	5.329	1.0066	5.199	0.988	3.407	0.9693
387.38			4.763	0.9435	5.014	0.9828	5.409	1.024	5.008	1.0554	4.772	0.9878	5.324	1.0057	5.236	0.9951	3.365	0.9573
387.58			4.794	0.9497	5.038	0.9875	5.477	1.0369	4.986	1.0508	4.828	0.9994	5.27	0.9955	5.241	0.996	3.426	0.9747
387.79			4.785	0.9479	5.02	0.9839	5.454	1.0326	4.938	1.0407	4.869	1.0079	5.278	0.997	5.285	1.0044	3.432	0.9764
387.99			4.728	0.9366	4.964	0.973	5.381	1.0187	4.917	1.0362	4.864	1.0068	5.291	0.9994	5.266	1.0008	3.406	0.969
388.19			4.764	0.9437	4.959	0.972	5.322	1.0076	4.908	1.0344	4.888	1.0118	5.293	0.9998	5.28	1.0034	3.487	0.992
388.4			4.747	0.9404	4.915	0.9633	5.282	1	4.794	1.0103	4.917	1.0178	5.29	0.9992	5.285	1.0044	3.493	0.9937
388.6			4.77	0.9449	4.936	0.9675	5.339	1.0108	4.855	1.0232	4.848	1.0035	5.276	0.9966	5.354	1.0175	3.515	1
388.8			4.792	0.9493	4.905	0.9614	5.337	1.0104	4.858	1.0238	4.861	1.0062	5.28	0.9974	5.361	1.0188	3.532	1.0048
389.01			4.825	0.9558	4.912	0.9628	5.307	1.0047	4.879	1.0282	4.893	1.0128	5.282	0.9977	5.339	1.0146	3.553	1.0108
389.21			4.797	0.9503	4.934	0.9671	5.265	0.9968	4.902	1.0331	4.908	1.0159	5.259	0.9934	5.329	1.0127	3.568	1.0151
389.41			4.818	0.9544	4.942	0.9686	5.28	0.9996	4.924	1.0377	4.862	1.0064	5.201	0.9824	5.276	1.0027	3.513	0.9994
389.62			4.804	0.9517	4.927	0.9657	5.273	0.9983	4.964	1.0462	4.846	1.0031	5.208	0.9838	5.209	0.9899	3.514	0.9997
389.82			4.747	0.9404	4.884	0.9573	5.233	0.9907	4.952	1.0436	4.818	0.9973	5.213	0.9847	5.17	0.9825	3.509	0.9983
390.02			4.814	0.9536	4.903	0.961	5.244	0.9928	4.963	1.0459	4.798	0.9932	5.18	0.9785	5.086	0.9666	3.447	0.9807
390.22			4.893	0.9693	4.99	0.978	5.354	1.0136	5.014	1.0567	4.809	0.9954	5.141	0.9711	5.081	0.9656	3.456	0.9832
390.43			4.885	0.9677	4.988	0.9777	5.389	1.0203	5.008	1.0554	4.792	0.9919	5.175	0.9775	5.07	0.9635	3.43	0.9758
390.63			4.93	0.9766	5.029	0.9857	5.415	1.0252	5.042	1.0626	4.774	0.9882	5.117	0.9666	5.055	0.9607	3.424	0.9741
390.83			4.907	0.9721	4.993	0.9786	5.394	1.0212	5.005	1.0548	4.826	0.999	5.095	0.9624	5.017	0.9534	3.402	0.9679
391.04			4.82	0.9548	5.019	0.9837	5.372	1.017	4.967	1.0468	4.891	1.0124	5.135	0.97	5.043	0.9584	3.414	0.9713
391.24			4.812	0.9532	5.041	0.988	5.402	1.0227	4.927	1.0384	4.844	1.0027	5.102	0.9637	5.045	0.9588	3.414	0.9713
391.44			4.888	0.9683	5.065	0.9927	5.441	1.0301	4.905	1.0337	4.882	1.0106	5.18	0.9785	5.056	0.9609	3.455	0.9829
391.65			4.897	0.9701	5.108	1.0012	5.366	1.0159	4.939	1.0409	4.957	1.0261	5.242	0.9902	5.103	0.9698	3.489	0.9926
391.85			4.927	0.976	5.15	1.0094	5.412	1.0246	4.96	1.0453	4.98	1.0308	5.287	0.9987	5.157	0.98	3.457	0.9835
392.05			4.986	0.9877	5.202	1.0196	5.423	1.0267	4.98	1.0495	4.979	1.0306	5.301	1.0013	5.167	0.9819	3.418	0.9724
392.25			4.994	0.9893	5.201	1.0194	5.417	1.0256	4.969	1.0472	4.94	1.0226	5.25	0.9917	5.143	0.9774	3.375	0.9602
392.46			4.935	0.9776	5.173	1.0139	5.409	1.024	4.909	1.0346	4.943	1.0232	5.248	0.9913	5.149	0.9785	3.349	0.9528
392.66			4.972	0.9849	5.242	1.0274	5.397	1.0218	4.939	1.0409	4.935	1.0215	5.259	0.9934	5.121	0.9732	3.346	0.9519
392.86			4.941	0.9788	5.236	1.0263	5.425	1.0271	4.964	1.0462	4.939	1.0224	5.283	0.9979	5.137	0.9762	3.314	0.9428
393.07			4.97	0.9845	5.254	1.0298	5.396	1.0216	4.982	1.0499	4.944	1.0234	5.282	0.9977	5.124	0.9738	3.286	0.9349
393.27			5.075	1.0053	5.325	1.0437	5.414	1.025	5.022	1.0584	4.931	1.0207	5.274	0.9962	5.119	0.9728	3.269	0.93
393.47			5.094	1.0091	5.314	1.0416	5.344	1.0117	5.023	1.0586	4.966	1.0279	5.287	0.9987	5.158	0.9802	3.285	0.9346
393.67			5.038	0.998	5.265	1.0319	5.312	1.0057	5.034	1.0609	4.95	1.0246	5.213	0.9847	5.111	0.9713	3.273	0.9312
393.88			4.986	0.9877	5.224	1.0239	5.322	1.0076	4.978	1.0491	4.894	1.013	5.223	0.9866	5.102	0.9696	3.277	0.9323
394.08			4.972	0.9849	5.203	1.0198	5.295	1.0025	4.933	1.0396	4.843	1.0025	5.205	0.9832	5.087	0.9667	3.307	0.9408
394.28			4.927	0.976	5.18	1.0153	5.262	0.9962	4.91	1.0348	4.829	0.9996	5.211	0.9843	5.12	0.973	3.346	0.9519
394.49			4.873	0.9653	5.147	1.0088	5.238	0.9917	4.89	1.0306	4.876	1.0093	5.267	0.9949	5.173	0.9831	3.41	0.9701
394.69			4.878	0.9663	5.163	1.012	5.218	0.9879	4.925	1.0379	4.842	1.0023	5.311	1.0032	5.145	0.9778	3.428	0.9752
394.89			4.899	0.9705	5.109	1.0014	5.19	0.9826	4.931	1.0392	4.828	0.9994	5.272	0.9958	5.197	0.9876	3.419	0.9727
395.09			4.924	0.9754	5.075	0.9947	5.129	0.971	4.926	1.0381	4.805	0.9946	5.303	1.0017	5.223	0.9926	3.464	0.9855
395.3			4.904	0.9715	5.064	0.9926	5.125	0.9703	4.888	1.0301	4.838	1.0014	5.31	1.003	5.263	1.0002	3.508	0.998
395.5			4.886	0.9679	5.039	0.9877	5.116	0.9686	4.844	1.0209	4.825	0.9988	5.307	1.0025	5.264	1.0004	3.507	0.9977
395.7			4.872	0.9651	5.026	0.9851	5.126	0.9705	4.855	1.0232	4.791	0.9917	5.319	1.0047	5.246	0.997	3.518	1.0009
395.91			4.879	0.9665	5.042	0.9882	5.137	0.9725	4.806	1.0129	4.795	0.9925	5.373	1.0149	5.318	1.0106	3.533	1.0051
396.11			4.966	0.9838	5.095	0.9986	5.184	0.9814	4.871	1.0266	4.785	0.9905	5.352	1.011	5.289	1.0051	3.505	0.9972
396.31			4.962	0.983	5.081	0.9959	5.194	0.9833	4.83	1.0179	4.835	1.0008	5.321	1.0051	5.294	1.0061	3.538	1.0065
396.51			4.951	0.9808	5.023	0.9845	5.172	0.9792	4.754	1.0019	4.831	1	5.344	1.0094	5.276	1.0027	3.558	1.0122
396.72			4.975	0.9855	5.041	0.988	5.152	0.9754	4.819	1.0156	4.79	0.9915	5.378	1.0159	5.29	1.0053	3.591	1.0216
396.92			4.983	0.9871	4.967	0.9735	5.122	0.9697	4.779	1.0072	4.851	1.0041	5.372	1.0147	5.339	1.0146	3.617	1.029
397.12			4.878	0.9663	4.918	0.9639	5.105	0.9665	4.74	0.9989	4.863	1.0066	5.412	1.0223	5.339	1.0146	3.611	1.0273
397.32			4.852	0.9612	4.916	0.9635	5.088	0.9633	4.712	0.993	4.863	1.0066	5.391	1.0183	5.334	1.0137	3.63	1.0327
397.53			4.859	0.9626	4.905	0.9614	5.098	0.9652	4.7	0.9905	4.813	0.9963	5.39	1.0181	5.313	1.0097	3.574	1.0168
397.73			4.808	0.9525	4.868	0.9541	5.061	0.9582	4.693	0.989	4.818	0.9973	5.391	1.0183	5.308	1.0087	3.625	1.0313
397.93			4.811	0.9531	4.819	0.9445	5.063	0.9585	4.692	0.9888	4.77	0.9874	5.357	1.0119	5.286	1.0046	3.577	1.0176
398.14			4.839	0.9586	4.859	0.9524	5.108	0.9671	4.782	1.0078	4.697	0.9723	5.315	1.004	5.271	1.0017	3.529	1.004
398.34			4.795	0.9499	4.775	0.9359	5.064	0.9587	4.738	0.9985	4.7	0.9729	5.282	0.9977	5.275	1.0025	3.535	1.0057
398.54			4.802	0.9513	4.801	0.941	5.093	0.9642	4.817	1.0152	4.678	0.9683	5.29	0.9992	5.262	1	3.528	1.0037
398.74			4.875	0.9657	4.872	0.9549	5.169	0.9786	4.919	1.0367	4.692	0.9712	5.245	0.9907	5.296	1.0065	3.479	0.9898
398.95			4.905	0.9717	4.864	0.9534	5.197	0.9839	4.916	1.036	4.716	0.9762	5.213	0.9847	5.278	1.003	3.452	0.9821
399.15			4.899	0.9705	4.888	0.9581	5.16	0.9769	4.916	1.036	4.658	0.9642	5.167	0.976	5.231	0.9941	3.403	0.9681
399.35			5.001	0.9907	4.953	0.9708	5.233	0.9907	4.913	1.0354	4.634	0.9592	5.178	0.9781	5.17	0.9825	3.384	0.9627
399.55			4.986	0.9877	4.955	0.9712	5.224	0.989	4.909	1.0346	4.6	0.9522	5.131	0.9692	5.128	0.9745	3.341	0.9505
399.76			4.999	0.9903	4.961	0.9724	5.263	0.9964	4.966	1.0466	4.598	0.9518	5.127	0.9685	5.135	0.9759	3.363	0.9568
399.96			5.009	0.9923	4.959	0.972	5.257	0.9953	4.981	1.0497	4.582	0.9485	5.111	0.9654	5.132	0.9753	3.331	0.9477
400.16			4.981	0.9867	4.956	0.9714	5.244	0.9928	4.953	1.0438	4.628	0.958	5.13	0.969	5.183	0.985	3.366	0.9576
400.36			4.962	0.983	4.925	0.9653	5.233	0.9907	4.924	1.0377	4.679	0.9685	5.149	0.9726	5.193	0.9869	3.389	0.9642
400.57			4.965	0.9836	4.986	0.9773	5.244	0.9928	4.926	1.0381	4.695	0.9718	5.193	0.9809	5.204	0.989	3.364	0.957
400.77			4.976	0.9857	4.971	0.9743	5.191	0.9828	4.896	1.0318	4.689	0.9706	5.136	0.9702	5.165	0.9816	3.318	0.944
400.97			4.963	0.9832	4.989	0.9779	5.182	0.9811	4.851	1.0223	4.7	0.9729	5.16	0.9747	5.145	0.9778	3.343	0.9511
401.17			4.93	0.9766	5.003	0.9806	5.197	0.9839	4.822	1.0162	4.748	0.9828	5.15	0.9728	5.154	0.9795	3.372	0.9593
401.38			4.931	0.9768	4.997	0.9794	5.243	0.9926	4.852	1.0226	4.73	0.9791	5.144	0.9717	5.155	0.9797	3.347	0.9522
401.58			4.887	0.9681	4.992	0.9784	5.222	0.9886	4.892	1.031	4.745	0.9822	5.07	0.9577	5.164	0.9814	3.307	0.9408
401.78			4.898	0.9703	4.996	0.9792	5.252	0.9943	4.887	1.0299	4.765	0.9863	5.125	0.9681	5.149	0.9785	3.285	0.9346
401.98			4.86	0.9628	5.024	0.9847	5.218	0.9879	4.854	1.023	4.763	0.9859	5.162	0.9751	5.195	0.9873	3.276	0.932
402.19			4.897	0.9701	5.017	0.9833	5.268	0.9973	4.894	1.0314	4.741	0.9814	5.123	0.9677	5.2	0.9882	3.25	0.9246
402.39			4.924	0.9754	5.063	0.9924	5.301	1.0036	4.907	1.0341	4.731	0.9793	5.119	0.9669	5.152	0.9791	3.206	0.9121
402.59			4.911	0.9729	5.069	0.9935	5.267	0.9972	4.925	1.0379	4.755	0.9843	5.189	0.9802	5.178	0.984	3.223	0.9169
402.79			4.918	0.9742	5.058	0.9914	5.265	0.9968	4.926	1.0381	4.74	0.9812	5.235	0.9889	5.197	0.9876	3.25	0.9246
403			4.913	0.9733	5.053	0.9904	5.251	0.9941	4.897	1.032	4.76	0.9853	5.322	1.0053	5.241	0.996	3.296	0.9377
403.2			4.892	0.9691	5.038	0.9875	5.237	0.9915	4.916	1.036	4.754	0.9841	5.299	1.0009	5.214	0.9909	3.284	0.9343
403.4			4.926	0.9758	5.07	0.9937	5.239	0.9919	4.935	1.04	4.68	0.9687	5.31	1.003	5.183	0.985	3.273	0.9312
403.6			4.973	0.9851	5.1	0.9996	5.253	0.9945	4.934	1.0398	4.673	0.9673	5.301	1.0013	5.176	0.9837	3.307	0.9408
403.8			4.988	0.9881	5.112	1.002	5.224	0.989	4.923	1.0375	4.658	0.9642	5.365	1.0134	5.22	0.992	3.357	0.955
404.01			4.963	0.9832	5.103	1.0002	5.218	0.9879	4.919	1.0367	4.627	0.9578	5.352	1.011	5.252	0.9981	3.349	0.9528
404.21			4.963	0.9832	5.082	0.9961	5.23	0.9902	4.946	1.0424	4.622	0.9567	5.297	1.0006	5.21	0.9901	3.351	0.9533
404.41			4.964	0.9834	5.115	1.0025	5.227	0.9896	4.957	1.0447	4.642	0.9609	5.316	1.0042	5.21	0.9901	3.382	0.9622
404.61			4.949	0.9804	5.05	0.9898	5.219	0.9881	4.973	1.0481	4.593	0.9507	5.319	1.0047	5.2	0.9882	3.386	0.9633
404.82			4.98	0.9865	5.075	0.9947	5.215	0.9873	4.966	1.0466	4.549	0.9416	5.247	0.9911	5.144	0.9776	3.392	0.965
405.02			4.995	0.9895	5.087	0.9971	5.237	0.9915	4.994	1.0525	4.528	0.9373	5.183	0.979	5.14	0.9768	3.358	0.9553
405.22			5.028	0.996	5.096	0.9988	5.279	0.9994	5.036	1.0613	4.5	0.9315	5.157	0.9741	5.14	0.9768	3.35	0.9531
405.42			5.05	1.0004	5.096	0.9988	5.309	1.0051	5.085	1.0717	4.508	0.9331	5.189	0.9802	5.14	0.9768	3.347	0.9522
405.63			5.022	0.9948	5.08	0.9957	5.289	1.0013	5.062	1.0668	4.55	0.9418	5.167	0.976	5.155	0.9797	3.362	0.9565
405.83			5.018	0.9941	5.079	0.9955	5.283	1.0002	5.065	1.0674	4.572	0.9464	5.183	0.979	5.168	0.9821	3.366	0.9576
406.03			5.009	0.9923	5.054	0.9906	5.275	0.9987	5.052	1.0647	4.574	0.9468	5.173	0.9771	5.166	0.9818	3.344	0.9514
406.23			5.04	0.9984	5.075	0.9947	5.319	1.007	5.079	1.0704	4.639	0.9603	5.143	0.9715	5.168	0.9821	3.361	0.9562
406.43			5.099	1.0101	5.101	0.9998	5.317	1.0066	5.058	1.066	4.653	0.9632	5.18	0.9785	5.182	0.9848	3.349	0.9528
406.64			5.101	1.0105	5.142	1.0078	5.368	1.0163	5.078	1.0702	4.664	0.9654	5.22	0.986	5.17	0.9825	3.339	0.9499
406.84			5.142	1.0186	5.204	1.02	5.392	1.0208	5.091	1.0729	4.714	0.9758	5.201	0.9824	5.185	0.9854	3.403	0.9681
407.04			5.139	1.018	5.172	1.0137	5.384	1.0193	5.058	1.066	4.731	0.9793	5.199	0.9821	5.202	0.9886	3.359	0.9556
407.24			5.131	1.0164	5.182	1.0157	5.382	1.0189	5.045	1.0632	4.793	0.9921	5.231	0.9881	5.222	0.9924	3.392	0.965
407.45			5.086	1.0075	5.192	1.0176	5.378	1.0182	5.021	1.0582	4.864	1.0068	5.24	0.9898	5.272	1.0019	3.439	0.9784
407.65			5.095	1.0093	5.203	1.0198	5.371	1.0168	4.976	1.0487	4.853	1.0046	5.206	0.9834	5.281	1.0036	3.43	0.9758
407.85			5.1	1.0103	5.19	1.0172	5.381	1.0187	5	1.0537	4.859	1.0058	5.249	0.9915	5.281	1.0036	3.4	0.9673
408.05			5.084	1.0071	5.196	1.0184	5.392	1.0208	4.984	1.0504	4.89	1.0122	5.265	0.9945	5.288	1.0049	3.414	0.9713
408.25			5.081	1.0065	5.219	1.0229	5.422	1.0265	5.025	1.059	4.921	1.0186	5.218	0.9856	5.253	0.9983	3.418	0.9724
408.46			5.073	1.005	5.179	1.0151	5.366	1.0159	5.015	1.0569	4.924	1.0193	5.259	0.9934	5.278	1.003	3.422	0.9735
408.66			5.062	1.0028	5.157	1.0108	5.382	1.0189	5.054	1.0651	4.936	1.0217	5.29	0.9992	5.3	1.0072	3.437	0.9778
408.86			5.011	0.9927	5.064	0.9926	5.335	1.01	4.984	1.0504	4.95	1.0246	5.239	0.9896	5.325	1.012	3.438	0.9781
409.06			4.987	0.9879	5.083	0.9963	5.359	1.0146	4.967	1.0468	4.985	1.0319	5.237	0.9892	5.332	1.0133	3.388	0.9639
409.26			5.034	0.9972	5.105	1.0006	5.406	1.0235	5.004	1.0546	5.003	1.0356	5.259	0.9934	5.304	1.008	3.396	0.9661
409.47			5.023	0.995	5.085	0.9967	5.387	1.0199	5.013	1.0565	4.959	1.0265	5.231	0.9881	5.285	1.0044	3.383	0.9624
409.67			5.066	1.0036	5.112	1.002	5.412	1.0246	5.025	1.059	4.876	1.0093	5.233	0.9885	5.236	0.9951	3.314	0.9428
409.87			5.035	0.9974	5.039	0.9877	5.363	1.0153	4.983	1.0502	4.891	1.0124	5.269	0.9953	5.265	1.0006	3.326	0.9462
410.07			5.028	0.996	5.044	0.9886	5.354	1.0136	4.987	1.051	4.895	1.0132	5.231	0.9881	5.275	1.0025	3.318	0.944
410.27			5.033	0.997	5.046	0.989	5.374	1.0174	5.005	1.0548	4.871	1.0083	5.232	0.9883	5.289	1.0051	3.281	0.9334
410.48			5.056	1.0016	5.034	0.9867	5.364	1.0155	4.981	1.0497	4.834	1.0006	5.28	0.9974	5.32	1.011	3.284	0.9343
410.68			5.079	1.0061	5.071	0.9939	5.39	1.0204	4.972	1.0478	4.808	0.9952	5.266	0.9947	5.303	1.0078	3.262	0.928
410.88			5.072	1.0048	5.109	1.0014	5.378	1.0182	4.955	1.0443	4.789	0.9913	5.265	0.9945	5.273	1.0021	3.299	0.9385
411.08			5.16	1.0222	5.171	1.0135	5.417	1.0256	4.991	1.0518	4.782	0.9899	5.301	1.0013	5.274	1.0023	3.339	0.9499
411.28			5.182	1.0265	5.123	1.0041	5.404	1.0231	4.997	1.0531	4.775	0.9884	5.358	1.0121	5.294	1.0061	3.383	0.9624
411.49			5.154	1.021	5.106	1.0008	5.367	1.0161	4.999	1.0535	4.764	0.9861	5.361	1.0127	5.323	1.0116	3.417	0.9721
411.69			5.177	1.0256	5.14	1.0074	5.39	1.0204	4.979	1.0493	4.794	0.9923	5.372	1.0147	5.303	1.0078	3.384	0.9627
411.89			5.159	1.022	5.145	1.0084	5.415	1.0252	4.991	1.0518	4.846	1.0031	5.38	1.0162	5.272	1.0019	3.407	0.9693
412.09			5.191	1.0283	5.226	1.0243	5.485	1.0384	5.057	1.0658	4.838	1.0014	5.34	1.0087	5.276	1.0027	3.417	0.9721
412.29			5.23	1.0361	5.22	1.0231	5.489	1.0392	5.047	1.0636	4.845	1.0029	5.412	1.0223	5.323	1.0116	3.44	0.9787
412.5			5.233	1.0366	5.244	1.0278	5.444	1.0307	5.039	1.062	4.857	1.0054	5.423	1.0244	5.311	1.0093	3.473	0.9881
412.7			5.227	1.0355	5.229	1.0249	5.446	1.031	5.036	1.0613	4.922	1.0188	5.424	1.0246	5.33	1.0129	3.508	0.998
412.9			5.189	1.0279	5.242	1.0274	5.448	1.0314	5.053	1.0649	4.916	1.0176	5.462	1.0317	5.318	1.0106	3.538	1.0065
413.1			5.184	1.0269	5.19	1.0172	5.465	1.0346	5.043	1.0628	4.898	1.0139	5.453	1.03	5.328	1.0125	3.524	1.0026
413.3			5.098	1.0099	5.176	1.0145	5.408	1.0239	5.026	1.0592	4.921	1.0186	5.485	1.0361	5.344	1.0156	3.513	0.9994
413.51			5.087	1.0077	5.234	1.0259	5.408	1.0239	5.034	1.0609	4.91	1.0164	5.485	1.0361	5.384	1.0232	3.522	1.002
413.71			5.059	1.0022	5.263	1.0316	5.428	1.0276	4.999	1.0535	4.911	1.0166	5.468	1.0329	5.388	1.0239	3.474	0.9883
413.91			5.031	0.9966	5.252	1.0294	5.395	1.0214	5.005	1.0548	4.91	1.0164	5.482	1.0355	5.418	1.0296	3.545	1.0085
414.11			5.009	0.9923	5.219	1.0229	5.376	1.0178	4.962	1.0457	4.909	1.0161	5.475	1.0342	5.455	1.0367	3.534	1.0054
414.31			4.977	0.9859	5.189	1.0171	5.335	1.01	4.94	1.0411	4.945	1.0236	5.518	1.0423	5.45	1.0357	3.543	1.008
414.51			4.945	0.9796	5.18	1.0153	5.36	1.0148	4.942	1.0415	4.884	1.011	5.431	1.0259	5.392	1.0247	3.521	1.0017
414.72			4.92	0.9746	5.135	1.0065	5.338	1.0106	4.924	1.0377	4.875	1.0091	5.399	1.0198	5.368	1.0201	3.546	1.0088
414.92			4.899	0.9705	5.142	1.0078	5.332	1.0095	4.907	1.0341	4.872	1.0085	5.417	1.0232	5.376	1.0217	3.553	1.0108
415.12			4.956	0.9818	5.12	1.0035	5.33	1.0091	4.921	1.0371	4.893	1.0128	5.386	1.0174	5.401	1.0264	3.58	1.0185
415.32			4.92	0.9746	5.172	1.0137	5.322	1.0076	4.927	1.0384	4.931	1.0207	5.416	1.023	5.419	1.0298	3.578	1.0179
415.52			4.995	0.9895	5.169	1.0131	5.353	1.0134	4.948	1.0428	4.947	1.024	5.384	1.017	5.39	1.0243	3.574	1.0168
415.73			5.025	0.9954	5.163	1.012	5.357	1.0142	4.921	1.0371	4.961	1.0269	5.371	1.0145	5.339	1.0146	3.569	1.0154
415.93			5.074	1.0052	5.165	1.0123	5.379	1.0184	4.972	1.0478	4.97	1.0288	5.382	1.0166	5.346	1.016	3.613	1.0279
416.13			5.102	1.0107	5.136	1.0067	5.388	1.0201	4.95	1.0432	4.975	1.0298	5.354	1.0113	5.319	1.0108	3.629	1.0324
416.33			5.073	1.005	5.115	1.0025	5.35	1.0129	4.971	1.0476	4.954	1.0255	5.353	1.0111	5.355	1.0177	3.645	1.037
416.53			5.103	1.0109	5.162	1.0118	5.365	1.0157	4.992	1.0521	4.932	1.0209	5.348	1.0102	5.349	1.0165	3.628	1.0321
416.73			5.103	1.0109	5.188	1.0169	5.333	1.0097	4.965	1.0464	4.962	1.0271	5.386	1.0174	5.354	1.0175	3.628	1.0321
416.94			5.105	1.0113	5.172	1.0137	5.33	1.0091	4.971	1.0476	4.93	1.0205	5.378	1.0159	5.348	1.0163	3.619	1.0296
417.14			5.124	1.0151	5.19	1.0172	5.313	1.0059	4.951	1.0434	4.934	1.0213	5.347	1.01	5.331	1.0131	3.629	1.0324
417.34			5.098	1.0099	5.194	1.018	5.289	1.0013	4.921	1.0371	4.927	1.0199	5.369	1.0142	5.357	1.0181	3.634	1.0339
417.54			5.133	1.0168	5.166	1.0125	5.274	0.9985	4.907	1.0341	4.91	1.0164	5.345	1.0096	5.354	1.0175	3.636	1.0344
417.74			5.124	1.0151	5.186	1.0165	5.278	0.9992	4.884	1.0293	4.913	1.017	5.396	1.0193	5.391	1.0245	3.652	1.039
417.94			5.094	1.0091	5.136	1.0067	5.233	0.9907	4.854	1.023	4.904	1.0151	5.407	1.0213	5.394	1.0251	3.606	1.0259
418.15			5.06	1.0024	5.112	1.002	5.216	0.9875	4.821	1.016	4.898	1.0139	5.42	1.0238	5.413	1.0287	3.602	1.0248
418.35			5.071	1.0046	5.116	1.0027	5.193	0.9832	4.827	1.0173	4.895	1.0132	5.444	1.0283	5.418	1.0296	3.564	1.0139
418.55			5.127	1.0156	5.141	1.0076	5.193	0.9832	4.821	1.016	4.864	1.0068	5.407	1.0213	5.361	1.0188	3.532	1.0048
418.75			5.099	1.0101	5.121	1.0037	5.164	0.9777	4.786	1.0086	4.845	1.0029	5.384	1.017	5.344	1.0156	3.548	1.0094
418.95			5.083	1.0069	5.091	0.9978	5.166	0.978	4.751	1.0013	4.868	1.0077	5.406	1.0212	5.375	1.0215	3.607	1.0262
419.15			5.09	1.0083	5.136	1.0067	5.187	0.982	4.763	1.0038	4.891	1.0124	5.43	1.0257	5.412	1.0285	3.613	1.0279
419.36			5.065	1.0034	5.119	1.0033	5.167	0.9782	4.755	1.0021	4.872	1.0085	5.445	1.0285	5.417	1.0295	3.605	1.0256
419.56			5.044	0.9992	5.11	1.0016	5.165	0.9778	4.751	1.0013	4.846	1.0031	5.437	1.027	5.392	1.0247	3.584	1.0196
419.76			5.042	0.9988	5.121	1.0037	5.161	0.9771	4.742	0.9994	4.857	1.0054	5.434	1.0264	5.404	1.027	3.575	1.0171
419.96			5.045	0.9994	5.118	1.0031	5.126	0.9705	4.748	1.0006	4.847	1.0033	5.409	1.0217	5.41	1.0281	3.539	1.0068
420.16			5.031	0.9966	5.149	1.0092	5.136	0.9724	4.752	1.0015	4.82	0.9977	5.393	1.0187	5.395	1.0253	3.51	0.9986
420.36			5.048	1	5.157	1.0108	5.128	0.9708	4.753	1.0017	4.855	1.005	5.424	1.0246	5.393	1.0249	3.535	1.0057
420.56			5.024	0.9952	5.166	1.0125	5.155	0.976	4.752	1.0015	4.844	1.0027	5.434	1.0264	5.419	1.0298	3.56	1.0128
420.77			5.026	0.9956	5.156	1.0106	5.151	0.9752	4.756	1.0023	4.884	1.011	5.484	1.0359	5.445	1.0348	3.604	1.0253
420.97			5.052	1.0008	5.16	1.0114	5.165	0.9778	4.754	1.0019	4.892	1.0126	5.528	1.0442	5.48	1.0414	3.597	1.0233
421.17			5.075	1.0053	5.176	1.0145	5.174	0.9796	4.786	1.0086	4.888	1.0118	5.52	1.0427	5.463	1.0382	3.564	1.0139
421.37			5.089	1.0081	5.175	1.0143	5.172	0.9792	4.763	1.0038	4.896	1.0135	5.52	1.0427	5.473	1.0401	3.576	1.0174
421.57			5.143	1.0188	5.204	1.02	5.192	0.983	4.802	1.012	4.9	1.0143	5.532	1.045	5.485	1.0424	3.556	1.0117
421.77			5.186	1.0273	5.212	1.0216	5.198	0.9841	4.795	1.0105	4.898	1.0139	5.541	1.0467	5.477	1.0409	3.558	1.0122
421.97			5.172	1.0246	5.205	1.0202	5.195	0.9835	4.793	1.0101	4.904	1.0151	5.57	1.0521	5.478	1.041	3.563	1.0137
422.18			5.161	1.0224	5.202	1.0196	5.188	0.9822	4.76	1.0032	4.895	1.0132	5.56	1.0502	5.451	1.0359	3.577	1.0176
422.38			5.169	1.024	5.205	1.0202	5.178	0.9803	4.758	1.0027	4.911	1.0166	5.571	1.0523	5.476	1.0407	3.61	1.027
422.58			5.138	1.0178	5.204	1.02	5.155	0.976	4.718	0.9943	4.866	1.0072	5.528	1.0442	5.447	1.0352	3.579	1.0182
422.78			5.145	1.0192	5.218	1.0227	5.13	0.9712	4.712	0.993	4.859	1.0058	5.497	1.0383	5.421	1.0302	3.573	1.0165
422.98			5.104	1.0111	5.211	1.0214	5.107	0.9669	4.671	0.9844	4.84	1.0019	5.479	1.0349	5.432	1.0323	3.571	1.0159
423.18			5.09	1.0083	5.195	1.0182	5.103	0.9661	4.672	0.9846	4.812	0.9961	5.43	1.0257	5.404	1.027	3.56	1.0128
423.38			5.088	1.0079	5.203	1.0198	5.085	0.9627	4.661	0.9823	4.778	0.989	5.424	1.0246	5.418	1.0296	3.538	1.0065
423.59			5.077	1.0057	5.172	1.0137	5.076	0.961	4.661	0.9823	4.752	0.9836	5.408	1.0215	5.389	1.0241	3.495	0.9943
423.79			5.052	1.0008	5.162	1.0118	5.086	0.9629	4.646	0.9791	4.765	0.9863	5.4	1.02	5.391	1.0245	3.52	1.0014
423.99			5.032	0.9968	5.166	1.0125	5.084	0.9625	4.649	0.9798	4.773	0.988	5.379	1.0161	5.395	1.0253	3.518	1.0009
424.19			5.054	1.0012	5.158	1.011	5.081	0.9619	4.636	0.977	4.762	0.9857	5.331	1.007	5.389	1.0241	3.516	1.0003
424.39			5.042	0.9988	5.142	1.0078	5.091	0.9638	4.646	0.9791	4.748	0.9828	5.337	1.0081	5.385	1.0234	3.503	0.9966
424.59			5.054	1.0012	5.132	1.0059	5.108	0.9671	4.667	0.9836	4.757	0.9847	5.346	1.0098	5.386	1.0236	3.517	1.0006
424.79			5.067	1.0038	5.128	1.0051	5.145	0.9741	4.711	0.9928	4.767	0.9868	5.352	1.011	5.402	1.0266	3.521	1.0017
425			5.043	0.999	5.11	1.0016	5.149	0.9748	4.703	0.9911	4.779	0.9892	5.36	1.0125	5.442	1.0342	3.526	1.0031
425.2			5.07	1.0044	5.139	1.0073	5.158	0.9765	4.736	0.9981	4.778	0.989	5.351	1.0108	5.424	1.0308	3.49	0.9929
425.4			5.084	1.0071	5.151	1.0096	5.173	0.9794	4.739	0.9987	4.789	0.9913	5.37	1.0144	5.433	1.0325	3.503	0.9966
425.6			5.052	1.0008	5.127	1.0049	5.167	0.9782	4.729	0.9966	4.811	0.9959	5.375	1.0153	5.425	1.031	3.521	1.0017
425.8			5.039	0.9982	5.121	1.0037	5.169	0.9786	4.711	0.9928	4.852	1.0043	5.413	1.0225	5.435	1.0329	3.555	1.0114
426			5.02	0.9945	5.104	1.0004	5.146	0.9743	4.69	0.9884	4.824	0.9986	5.388	1.0178	5.403	1.0268	3.52	1.0014
426.2			5.011	0.9927	5.104	1.0004	5.15	0.975	4.696	0.9897	4.821	0.9979	5.394	1.0189	5.394	1.0251	3.518	1.0009
426.4			4.998	0.9901	5.09	0.9976	5.15	0.975	4.708	0.9922	4.812	0.9961	5.427	1.0251	5.366	1.0198	3.516	1.0003
426.61			4.981	0.9867	5.086	0.9969	5.139	0.9729	4.703	0.9911	4.832	1.0002	5.426	1.0249	5.368	1.0201	3.519	1.0011
426.81			4.957	0.982	5.052	0.9902	5.103	0.9661	4.675	0.9852	4.815	0.9967	5.39	1.0181	5.33	1.0129	3.493	0.9937
427.01			4.932	0.977	5.056	0.991	5.055	0.957	4.663	0.9827	4.822	0.9981	5.395	1.0191	5.305	1.0082	3.493	0.9937
427.21			4.92	0.9746	5.043	0.9884	5.026	0.9515	4.643	0.9785	4.797	0.993	5.374	1.0151	5.26	0.9996	3.455	0.9829
427.41			4.896	0.9699	4.987	0.9775	5.013	0.9491	4.611	0.9718	4.8	0.9936	5.368	1.014	5.244	0.9966	3.439	0.9784
427.61			4.837	0.9582	4.951	0.9704	4.955	0.9381	4.577	0.9646	4.815	0.9967	5.357	1.0119	5.229	0.9937	3.413	0.971
427.81			4.827	0.9562	4.934	0.9671	4.932	0.9337	4.563	0.9616	4.775	0.9884	5.307	1.0025	5.199	0.988	3.379	0.9613
428.01			4.805	0.9519	4.908	0.962	4.896	0.9269	4.547	0.9583	4.729	0.9789	5.248	0.9913	5.186	0.9856	3.336	0.9491
428.21			4.764	0.9437	4.87	0.9545	4.894	0.9265	4.55	0.9589	4.707	0.9743	5.242	0.9902	5.191	0.9865	3.343	0.9511
428.42			4.749	0.9408	4.837	0.9481	4.868	0.9216	4.531	0.9549	4.698	0.9725	5.213	0.9847	5.167	0.9819	3.309	0.9414
428.62			4.701	0.9313	4.839	0.9485	4.835	0.9154	4.499	0.9482	4.683	0.9694	5.174	0.9773	5.183	0.985	3.297	0.938
428.82			4.688	0.9287	4.825	0.9457	4.822	0.9129	4.491	0.9465	4.636	0.9596	5.146	0.972	5.163	0.9812	3.295	0.9374
429.02			4.673	0.9257	4.817	0.9441	4.803	0.9093	4.463	0.9406	4.605	0.9532	5.126	0.9683	5.161	0.9808	3.29	0.936
429.22			4.682	0.9275	4.798	0.9404	4.818	0.9122	4.421	0.9317	4.553	0.9425	5.092	0.9618	5.142	0.9772	3.242	0.9223
429.42			4.673	0.9257	4.763	0.9336	4.808	0.9103	4.45	0.9378	4.527	0.9371	5.091	0.9617	5.128	0.9745	3.245	0.9232
429.62			4.612	0.9136	4.718	0.9247	4.76	0.9012	4.412	0.9298	4.517	0.935	5.068	0.9573	5.101	0.9694	3.251	0.9249
429.82			4.604	0.912	4.703	0.9218	4.779	0.9048	4.431	0.9338	4.501	0.9317	5.042	0.9524	5.066	0.9628	3.222	0.9166
430.02			4.644	0.92	4.705	0.9222	4.789	0.9067	4.446	0.937	4.49	0.9294	5.031	0.9503	5.019	0.9538	3.205	0.9118
430.22			4.641	0.9194	4.741	0.9292	4.791	0.907	4.478	0.9437	4.506	0.9327	5.027	0.9496	5.014	0.9529	3.204	0.9115
430.43			4.641	0.9194	4.715	0.9241	4.776	0.9042	4.465	0.941	4.514	0.9344	5.032	0.9505	4.985	0.9474	3.196	0.9092
430.63			4.6	0.9113	4.713	0.9238	4.77	0.9031	4.488	0.9458	4.543	0.9404	5.076	0.9588	4.998	0.9498	3.221	0.9164
430.83			4.584	0.9081	4.687	0.9187	4.784	0.9057	4.473	0.9427	4.555	0.9429	5.053	0.9545	4.94	0.9388	3.188	0.907
431.03			4.584	0.9081	4.685	0.9183	4.818	0.9122	4.498	0.9479	4.562	0.9443	5.066	0.9569	4.958	0.9422	3.196	0.9092
431.23			4.564	0.9041	4.703	0.9218	4.857	0.9195	4.536	0.956	4.598	0.9518	5.054	0.9547	4.976	0.9456	3.225	0.9175
431.43			4.561	0.9035	4.699	0.921	4.873	0.9226	4.579	0.965	4.634	0.9592	5.048	0.9535	4.981	0.9466	3.215	0.9147
431.63			4.571	0.9055	4.715	0.9241	4.892	0.9262	4.573	0.9638	4.651	0.9627	5.077	0.959	4.991	0.9485	3.23	0.9189
431.83			4.591	0.9095	4.746	0.9302	4.949	0.937	4.595	0.9684	4.625	0.9574	5.077	0.959	5.018	0.9536	3.237	0.9209
432.03			4.581	0.9075	4.747	0.9304	4.936	0.9345	4.577	0.9646	4.617	0.9557	5.096	0.9626	5.043	0.9584	3.271	0.9306
432.23			4.54	0.8994	4.734	0.9279	4.949	0.937	4.586	0.9665	4.633	0.959	5.118	0.9668	5.098	0.9688	3.285	0.9346
432.44			4.545	0.9004	4.733	0.9277	4.985	0.9438	4.587	0.9667	4.622	0.9567	5.15	0.9728	5.131	0.9751	3.299	0.9385
432.64			4.545	0.9004	4.761	0.9332	5.017	0.9498	4.6	0.9694	4.636	0.9596	5.186	0.9796	5.169	0.9823	3.334	0.9485
432.84			4.569	0.9051	4.764	0.9338	5.019	0.9502	4.589	0.9671	4.621	0.9565	5.146	0.972	5.167	0.9819	3.329	0.9471
433.04			4.601	0.9115	4.796	0.94	5.033	0.9529	4.635	0.9768	4.648	0.9621	5.193	0.9809	5.221	0.9922	3.368	0.9582
433.24			4.631	0.9174	4.815	0.9437	5.048	0.9557	4.661	0.9823	4.659	0.9644	5.186	0.9796	5.215	0.9911	3.358	0.9553
433.44			4.646	0.9204	4.817	0.9441	5.05	0.9561	4.663	0.9827	4.633	0.959	5.202	0.9826	5.215	0.9911	3.349	0.9528
433.64			4.641	0.9194	4.789	0.9387	5.051	0.9563	4.664	0.9829	4.62	0.9563	5.217	0.9855	5.252	0.9981	3.371	0.959
433.84			4.662	0.9235	4.823	0.9453	5.082	0.9621	4.683	0.9869	4.623	0.9569	5.209	0.9839	5.249	0.9975	3.351	0.9533
434.04			4.67	0.9251	4.823	0.9453	5.068	0.9595	4.71	0.9926	4.673	0.9673	5.236	0.989	5.257	0.999	3.392	0.965
434.24			4.7	0.9311	4.864	0.9534	5.092	0.964	4.744	0.9998	4.706	0.9741	5.249	0.9915	5.285	1.0044	3.415	0.9716
434.44			4.758	0.9426	4.927	0.9657	5.143	0.9737	4.789	1.0093	4.747	0.9826	5.275	0.9964	5.284	1.0042	3.458	0.9838
434.64			4.802	0.9513	4.964	0.973	5.18	0.9807	4.814	1.0145	4.755	0.9843	5.282	0.9977	5.254	0.9985	3.45	0.9815
434.85			4.822	0.9552	4.973	0.9747	5.189	0.9824	4.812	1.0141	4.783	0.9901	5.282	0.9977	5.239	0.9956	3.417	0.9721
435.05			4.822	0.9552	4.943	0.9688	5.192	0.983	4.807	1.0131	4.756	0.9845	5.313	1.0036	5.252	0.9981	3.435	0.9772
435.25			4.833	0.9574	4.941	0.9684	5.185	0.9816	4.804	1.0124	4.74	0.9812	5.309	1.0028	5.239	0.9956	3.419	0.9727
435.45			4.791	0.9491	4.894	0.9592	5.126	0.9705	4.741	0.9992	4.77	0.9874	5.338	1.0083	5.258	0.9992	3.438	0.9781
435.65			4.787	0.9483	4.9	0.9604	5.125	0.9703	4.717	0.9941	4.802	0.994	5.366	1.0136	5.249	0.9975	3.435	0.9772
435.85			4.793	0.9495	4.924	0.9651	5.116	0.9686	4.717	0.9941	4.814	0.9965	5.37	1.0144	5.241	0.996	3.444	0.9798
436.05			4.78	0.9469	4.89	0.9584	5.076	0.961	4.678	0.9859	4.851	1.0041	5.388	1.0178	5.276	1.0027	3.479	0.9898
436.25			4.821	0.955	4.914	0.9632	5.104	0.9663	4.696	0.9897	4.824	0.9986	5.369	1.0142	5.259	0.9994	3.454	0.9826
436.45			4.829	0.9566	4.901	0.9606	5.091	0.9638	4.7	0.9905	4.81	0.9957	5.361	1.0127	5.255	0.9987	3.451	0.9818
436.65			4.776	0.9461	4.846	0.9498	5.077	0.9612	4.648	0.9796	4.796	0.9928	5.353	1.0111	5.269	1.0013	3.445	0.9801
436.85			4.72	0.935	4.812	0.9432	5.053	0.9566	4.63	0.9758	4.796	0.9928	5.359	1.0123	5.285	1.0044	3.478	0.9895
437.05			4.717	0.9344	4.815	0.9437	5.012	0.9489	4.623	0.9743	4.752	0.9836	5.334	1.0076	5.296	1.0065	3.48	0.99
437.25			4.711	0.9332	4.867	0.9539	5.057	0.9574	4.621	0.9739	4.778	0.989	5.305	1.0021	5.263	1.0002	3.454	0.9826
437.45			4.723	0.9356	4.87	0.9545	5.098	0.9652	4.62	0.9737	4.759	0.9851	5.281	0.9975	5.256	0.9989	3.454	0.9826
437.65			4.753	0.9416	4.913	0.963	5.12	0.9693	4.664	0.9829	4.736	0.9803	5.254	0.9924	5.228	0.9935	3.435	0.9772
437.86			4.774	0.9457	4.932	0.9667	5.129	0.971	4.706	0.9918	4.708	0.9745	5.231	0.9881	5.235	0.9949	3.435	0.9772
438.06			4.786	0.9481	4.925	0.9653	5.129	0.971	4.688	0.988	4.685	0.9698	5.209	0.9839	5.209	0.9899	3.444	0.9798
438.26			4.802	0.9513	4.942	0.9686	5.16	0.9769	4.688	0.988	4.637	0.9598	5.176	0.9777	5.185	0.9854	3.395	0.9659
438.46			4.814	0.9536	4.944	0.969	5.173	0.9794	4.693	0.989	4.618	0.9559	5.189	0.9802	5.212	0.9905	3.405	0.9687
438.66			4.832	0.9572	4.97	0.9741	5.218	0.9879	4.709	0.9924	4.614	0.9551	5.199	0.9821	5.18	0.9844	3.4	0.9673
438.86			4.853	0.9614	4.996	0.9792	5.195	0.9835	4.732	0.9973	4.606	0.9534	5.219	0.9858	5.158	0.9802	3.385	0.963
439.06			4.891	0.9689	5.012	0.9824	5.193	0.9832	4.742	0.9994	4.607	0.9536	5.203	0.9828	5.153	0.9793	3.367	0.9579
439.26			4.905	0.9717	5.017	0.9833	5.219	0.9881	4.757	1.0025	4.614	0.9551	5.215	0.9851	5.147	0.9781	3.39	0.9644
439.46			4.909	0.9725	4.992	0.9784	5.187	0.982	4.763	1.0038	4.615	0.9553	5.224	0.9868	5.155	0.9797	3.41	0.9701
439.66			4.927	0.976	4.996	0.9792	5.183	0.9813	4.788	1.0091	4.619	0.9561	5.218	0.9856	5.169	0.9823	3.401	0.9676
439.86			4.95	0.9806	5.003	0.9806	5.205	0.9854	4.8	1.0116	4.643	0.9611	5.227	0.9873	5.185	0.9854	3.42	0.973
440.06			4.955	0.9816	4.997	0.9794	5.218	0.9879	4.807	1.0131	4.672	0.9671	5.27	0.9955	5.222	0.9924	3.439	0.9784
440.26			4.967	0.984	5.026	0.9851	5.249	0.9938	4.846	1.0213	4.709	0.9747	5.294	1	5.276	1.0027	3.446	0.9804
440.46			4.973	0.9851	5.033	0.9865	5.257	0.9953	4.874	1.0272	4.723	0.9776	5.328	1.0064	5.279	1.0032	3.472	0.9878
440.66			4.983	0.9871	5.079	0.9955	5.289	1.0013	4.901	1.0329	4.78	0.9894	5.358	1.0121	5.307	1.0086	3.492	0.9935
440.86			4.97	0.9845	5.061	0.992	5.285	1.0006	4.894	1.0314	4.81	0.9957	5.369	1.0142	5.337	1.0143	3.512	0.9991
441.06			4.979	0.9863	5.08	0.9957	5.304	1.0042	4.909	1.0346	4.821	0.9979	5.356	1.0117	5.369	1.0203	3.528	1.0037
441.26			4.974	0.9853	5.081	0.9959	5.328	1.0087	4.924	1.0377	4.84	1.0019	5.397	1.0195	5.395	1.0253	3.561	1.0131
441.46			4.988	0.9881	5.098	0.9992	5.351	1.0131	4.934	1.0398	4.866	1.0072	5.4	1.02	5.411	1.0283	3.559	1.0125
441.67			5.052	1.0008	5.125	1.0045	5.391	1.0206	4.98	1.0495	4.895	1.0132	5.42	1.0238	5.435	1.0329	3.572	1.0162
441.87			5.048	1	5.139	1.0073	5.413	1.0248	4.998	1.0533	4.92	1.0184	5.445	1.0285	5.436	1.0331	3.598	1.0236
442.07			5.061	1.0026	5.141	1.0076	5.441	1.0301	5.006	1.055	4.899	1.0141	5.438	1.0272	5.423	1.0306	3.582	1.0191
442.27			5.052	1.0008	5.133	1.0061	5.447	1.0312	4.974	1.0483	4.91	1.0164	5.426	1.0249	5.4	1.0262	3.574	1.0168
442.47			5.041	0.9986	5.139	1.0073	5.423	1.0267	4.934	1.0398	4.889	1.012	5.452	1.0298	5.376	1.0217	3.588	1.0208
442.67			5.05	1.0004	5.148	1.009	5.435	1.029	4.942	1.0415	4.903	1.0149	5.45	1.0295	5.416	1.0293	3.599	1.0239
442.87			5.034	0.9972	5.102	1	5.399	1.0222	4.901	1.0329	4.887	1.0116	5.45	1.0295	5.363	1.0192	3.585	1.0199
443.07			5.044	0.9992	5.083	0.9963	5.378	1.0182	4.886	1.0297	4.867	1.0075	5.441	1.0278	5.351	1.0169	3.572	1.0162
443.27			5.038	0.998	5.056	0.991	5.353	1.0134	4.857	1.0236	4.865	1.007	5.434	1.0264	5.338	1.0144	3.57	1.0156
443.47			5.054	1.0012	5.077	0.9951	5.327	1.0085	4.833	1.0185	4.868	1.0077	5.407	1.0213	5.309	1.0089	3.571	1.0159
443.67			5.019	0.9943	5.065	0.9927	5.308	1.0049	4.809	1.0135	4.872	1.0085	5.398	1.0196	5.299	1.007	3.547	1.0091
443.87			4.986	0.9877	5.076	0.9949	5.292	1.0019	4.776	1.0065	4.848	1.0035	5.389	1.0179	5.286	1.0046	3.533	1.0051
444.07			4.974	0.9853	5.054	0.9906	5.253	0.9945	4.714	0.9935	4.831	1	5.378	1.0159	5.286	1.0046	3.522	1.002
444.27			4.969	0.9844	5.068	0.9933	5.237	0.9915	4.692	0.9888	4.854	1.0048	5.398	1.0196	5.33	1.0129	3.526	1.0031
444.47			4.964	0.9834	5.07	0.9937	5.216	0.9875	4.698	0.9901	4.829	0.9996	5.385	1.0172	5.352	1.0171	3.534	1.0054
444.67			4.974	0.9853	5.043	0.9884	5.225	0.9892	4.708	0.9922	4.836	1.001	5.368	1.014	5.343	1.0154	3.515	1
444.87			4.981	0.9867	5.045	0.9888	5.218	0.9879	4.698	0.9901	4.858	1.0056	5.376	1.0155	5.345	1.0158	3.524	1.0026
445.07			4.99	0.9885	5.069	0.9935	5.23	0.9902	4.738	0.9985	4.872	1.0085	5.368	1.014	5.394	1.0251	3.536	1.006
445.27			5.015	0.9935	5.106	1.0008	5.259	0.9956	4.745	1	4.871	1.0083	5.368	1.014	5.4	1.0262	3.539	1.0068
445.47			5.043	0.999	5.135	1.0065	5.295	1.0025	4.772	1.0057	4.869	1.0079	5.37	1.0144	5.404	1.027	3.531	1.0046
445.67			5.059	1.0022	5.133	1.0061	5.308	1.0049	4.811	1.0139	4.858	1.0056	5.389	1.0179	5.422	1.0304	3.538	1.0065
445.87			5.077	1.0057	5.147	1.0088	5.318	1.0068	4.851	1.0223	4.854	1.0048	5.403	1.0206	5.44	1.0338	3.573	1.0165
446.07			5.08	1.0063	5.125	1.0045	5.327	1.0085	4.842	1.0204	4.871	1.0083	5.427	1.0251	5.482	1.0418	3.611	1.0273
446.27			5.096	1.0095	5.139	1.0073	5.347	1.0123	4.878	1.028	4.888	1.0118	5.465	1.0323	5.489	1.0431	3.642	1.0361
446.47			5.13	1.0162	5.153	1.01	5.362	1.0151	4.896	1.0318	4.895	1.0132	5.494	1.0378	5.476	1.0407	3.666	1.043
446.67			5.163	1.0228	5.18	1.0153	5.41	1.0242	4.944	1.0419	4.898	1.0139	5.503	1.0395	5.48	1.0414	3.657	1.0404
446.87			5.18	1.0261	5.219	1.0229	5.444	1.0307	4.966	1.0466	4.904	1.0151	5.501	1.0391	5.502	1.0456	3.66	1.0413
447.07			5.187	1.0275	5.244	1.0278	5.471	1.0358	4.989	1.0514	4.893	1.0128	5.508	1.0404	5.472	1.0399	3.692	1.0504
447.27			5.183	1.0267	5.243	1.0276	5.47	1.0356	4.98	1.0495	4.885	1.0112	5.507	1.0402	5.461	1.0378	3.701	1.0529
447.47			5.155	1.0212	5.216	1.0223	5.469	1.0354	4.996	1.0529	4.881	1.0103	5.532	1.045	5.459	1.0374	3.704	1.0538
447.67			5.154	1.021	5.204	1.02	5.467	1.035	4.984	1.0504	4.911	1.0166	5.552	1.0487	5.453	1.0363	3.728	1.0606
447.87			5.137	1.0176	5.205	1.0202	5.501	1.0415	4.979	1.0493	4.932	1.0209	5.543	1.047	5.466	1.0388	3.718	1.0578
448.07			5.145	1.0192	5.198	1.0188	5.505	1.0422	4.958	1.0449	4.928	1.0201	5.538	1.0461	5.445	1.0348	3.711	1.0558
448.27			5.141	1.0184	5.215	1.0221	5.509	1.043	4.982	1.0499	4.936	1.0217	5.542	1.0468	5.436	1.0331	3.694	1.0509
448.47			5.139	1.018	5.226	1.0243	5.513	1.0437	4.988	1.0512	4.932	1.0209	5.507	1.0402	5.445	1.0348	3.678	1.0464
448.67			5.124	1.0151	5.204	1.02	5.498	1.0409	4.974	1.0483	4.9	1.0143	5.465	1.0323	5.448	1.0353	3.67	1.0441
448.87			5.124	1.0151	5.203	1.0198	5.482	1.0379	4.951	1.0434	4.924	1.0193	5.481	1.0353	5.439	1.0336	3.681	1.0472
449.07			5.124	1.0151	5.177	1.0147	5.468	1.0352	4.953	1.0438	4.936	1.0217	5.502	1.0393	5.44	1.0338	3.707	1.0546
449.27			5.118	1.0139	5.143	1.008	5.427	1.0275	4.956	1.0445	4.915	1.0174	5.473	1.0338	5.454	1.0365	3.653	1.0393
449.47			5.107	1.0117	5.13	1.0055	5.423	1.0267	4.939	1.0409	4.907	1.0157	5.465	1.0323	5.452	1.0361	3.651	1.0387
449.67			5.12	1.0143	5.159	1.0112	5.405	1.0233	4.927	1.0384	4.93	1.0205	5.471	1.0334	5.447	1.0352	3.648	1.0378
449.87			5.086	1.0075	5.153	1.01	5.404	1.0231	4.945	1.0421	4.902	1.0147	5.465	1.0323	5.459	1.0374	3.632	1.0333
450.07			5.063	1.003	5.129	1.0053	5.342	1.0114	4.931	1.0392	4.87	1.0081	5.45	1.0295	5.419	1.0298	3.609	1.0267
450.27			5.017	0.9939	5.127	1.0049	5.316	1.0064	4.904	1.0335	4.863	1.0066	5.427	1.0251	5.421	1.0302	3.591	1.0216
450.47			4.994	0.9893	5.116	1.0027	5.289	1.0013	4.865	1.0253	4.833	1.0004	5.396	1.0193	5.401	1.0264	3.546	1.0088
450.67			4.961	0.9828	5.097	0.999	5.24	0.992	4.82	1.0158	4.82	0.9977	5.403	1.0206	5.407	1.0276	3.51	0.9986
450.87			4.932	0.977	5.085	0.9967	5.228	0.9898	4.842	1.0204	4.835	1.0008	5.41	1.0219	5.386	1.0236	3.483	0.9909
451.07			4.885	0.9677	5.044	0.9886	5.207	0.9858	4.807	1.0131	4.808	0.9952	5.366	1.0136	5.361	1.0188	3.46	0.9844
451.27			4.853	0.9614	5.052	0.9902	5.194	0.9833	4.79	1.0095	4.781	0.9897	5.334	1.0076	5.345	1.0158	3.424	0.9741
451.47			4.826	0.956	5.056	0.991	5.199	0.9843	4.736	0.9981	4.803	0.9942	5.345	1.0096	5.332	1.0133	3.417	0.9721
451.67			4.846	0.96	5.06	0.9918	5.19	0.9826	4.725	0.9958	4.775	0.9884	5.303	1.0017	5.281	1.0036	3.362	0.9565
451.87			4.851	0.961	5.064	0.9926	5.205	0.9854	4.74	0.9989	4.739	0.981	5.269	0.9953	5.29	1.0053	3.362	0.9565
452.07			4.873	0.9653	5.044	0.9886	5.177	0.9801	4.72	0.9947	4.735	0.9801	5.256	0.9928	5.254	0.9985	3.342	0.9508
452.27			4.88	0.9667	5.061	0.992	5.17	0.9788	4.717	0.9941	4.733	0.9797	5.239	0.9896	5.264	1.0004	3.338	0.9496
452.47			4.937	0.978	5.079	0.9955	5.212	0.9867	4.731	0.997	4.723	0.9776	5.241	0.99	5.268	1.0011	3.344	0.9514
452.67			4.947	0.98	5.08	0.9957	5.206	0.9856	4.747	1.0004	4.73	0.9791	5.256	0.9928	5.281	1.0036	3.379	0.9613
452.87			4.982	0.9869	5.106	1.0008	5.247	0.9934	4.783	1.008	4.724	0.9779	5.267	0.9949	5.264	1.0004	3.403	0.9681
453.07			4.967	0.984	5.1	0.9996	5.227	0.9896	4.76	1.0032	4.736	0.9803	5.277	0.9968	5.292	1.0057	3.423	0.9738
453.27			5.01	0.9925	5.136	1.0067	5.251	0.9941	4.793	1.0101	4.762	0.9857	5.28	0.9974	5.3	1.0072	3.436	0.9775
453.47			5.015	0.9935	5.099	0.9994	5.232	0.9905	4.784	1.0082	4.771	0.9876	5.289	0.9991	5.306	1.0084	3.456	0.9832
453.67			5.052	1.0008	5.114	1.0024	5.257	0.9953	4.816	1.015	4.783	0.9901	5.302	1.0015	5.299	1.007	3.483	0.9909
453.87			5.04	0.9984	5.133	1.0061	5.297	1.0028	4.846	1.0213	4.81	0.9957	5.337	1.0081	5.335	1.0139	3.523	1.0023
454.07			5.027	0.9958	5.111	1.0018	5.27	0.9977	4.81	1.0137	4.803	0.9942	5.351	1.0108	5.332	1.0133	3.518	1.0009
454.27			4.999	0.9903	5.111	1.0018	5.273	0.9983	4.81	1.0137	4.79	0.9915	5.355	1.0115	5.348	1.0163	3.53	1.0043
454.47			5.005	0.9915	5.067	0.9931	5.308	1.0049	4.795	1.0105	4.766	0.9865	5.351	1.0108	5.353	1.0173	3.514	0.9997
454.67			5.004	0.9913	5.048	0.9894	5.307	1.0047	4.826	1.0171	4.813	0.9963	5.383	1.0168	5.369	1.0203	3.532	1.0048
454.87			5.017	0.9939	5.042	0.9882	5.333	1.0097	4.831	1.0181	4.806	0.9948	5.345	1.0096	5.354	1.0175	3.531	1.0046
455.07			4.987	0.9879	5.002	0.9804	5.324	1.008	4.82	1.0158	4.8	0.9936	5.32	1.0049	5.323	1.0116	3.514	0.9997
455.27			5.019	0.9943	5.025	0.9849	5.346	1.0121	4.816	1.015	4.79	0.9915	5.298	1.0008	5.295	1.0063	3.5	0.9957
455.47			5.002	0.9909	5.005	0.981	5.315	1.0062	4.813	1.0143	4.792	0.9919	5.36	1.0125	5.316	1.0103	3.51	0.9986
455.67			5.006	0.9917	5.053	0.9904	5.329	1.0089	4.852	1.0226	4.808	0.9952	5.344	1.0094	5.276	1.0027	3.519	1.0011
455.87			4.974	0.9853	5.016	0.9831	5.292	1.0019	4.824	1.0166	4.796	0.9928	5.31	1.003	5.276	1.0027	3.531	1.0046
456.07			4.954	0.9814	4.981	0.9763	5.248	0.9936	4.8	1.0116	4.799	0.9934	5.33	1.0068	5.267	1.001	3.528	1.0037
456.27			4.986	0.9877	4.991	0.9782	5.274	0.9985	4.84	1.02	4.813	0.9963	5.301	1.0013	5.245	0.9968	3.504	0.9969
456.47			4.988	0.9881	4.974	0.9749	5.281	0.9998	4.817	1.0152	4.844	1.0027	5.305	1.0021	5.25	0.9977	3.529	1.004
456.67			5.004	0.9913	5.012	0.9824	5.273	0.9983	4.834	1.0188	4.864	1.0068	5.323	1.0055	5.238	0.9954	3.567	1.0148
456.87			4.973	0.9851	5.014	0.9828	5.241	0.9922	4.813	1.0143	4.818	0.9973	5.286	0.9985	5.196	0.9875	3.545	1.0085
457.06			4.969	0.9844	5.023	0.9845	5.241	0.9922	4.814	1.0145	4.833	1.0004	5.299	1.0009	5.221	0.9922	3.537	1.0063
457.26			4.979	0.9863	5.029	0.9857	5.234	0.9909	4.806	1.0129	4.811	0.9959	5.262	0.994	5.215	0.9911	3.536	1.006
457.46			4.971	0.9847	5.055	0.9908	5.223	0.9888	4.838	1.0196	4.788	0.9911	5.23	0.9879	5.199	0.988	3.513	0.9994
457.66			4.951	0.9808	5.052	0.9902	5.215	0.9873	4.816	1.015	4.729	0.9789	5.19	0.9804	5.164	0.9814	3.492	0.9935
457.86			4.957	0.982	5.053	0.9904	5.188	0.9822	4.784	1.0082	4.668	0.9663	5.176	0.9777	5.176	0.9837	3.442	0.9792
458.06			4.955	0.9816	5.053	0.9904	5.172	0.9792	4.789	1.0093	4.666	0.9658	5.176	0.9777	5.175	0.9835	3.425	0.9744
458.26			4.995	0.9895	5.056	0.991	5.166	0.978	4.792	1.0099	4.641	0.9607	5.16	0.9747	5.172	0.9829	3.401	0.9676
458.46			4.982	0.9869	5.051	0.99	5.157	0.9763	4.768	1.0048	4.634	0.9592	5.144	0.9717	5.177	0.9838	3.396	0.9661
458.66			4.989	0.9883	5.092	0.998	5.169	0.9786	4.805	1.0126	4.627	0.9578	5.134	0.9698	5.163	0.9812	3.38	0.9616
458.86			4.962	0.983	5.064	0.9926	5.158	0.9765	4.8	1.0116	4.66	0.9646	5.133	0.9696	5.187	0.9857	3.377	0.9607
459.06			4.984	0.9873	5.067	0.9931	5.166	0.978	4.79	1.0095	4.657	0.964	5.123	0.9677	5.201	0.9884	3.368	0.9582
459.26			5.002	0.9909	5.077	0.9951	5.187	0.982	4.818	1.0154	4.647	0.9619	5.149	0.9726	5.181	0.9846	3.379	0.9613
459.46			5.014	0.9933	5.105	1.0006	5.206	0.9856	4.856	1.0234	4.681	0.969	5.18	0.9785	5.212	0.9905	3.39	0.9644
459.66			5.016	0.9937	5.1	0.9996	5.211	0.9866	4.839	1.0198	4.709	0.9747	5.22	0.986	5.237	0.9952	3.399	0.967
459.86			5.035	0.9974	5.102	1	5.25	0.9939	4.863	1.0249	4.754	0.9841	5.225	0.987	5.242	0.9962	3.401	0.9676
460.06			5.048	1	5.129	1.0053	5.289	1.0013	4.879	1.0282	4.806	0.9948	5.251	0.9919	5.253	0.9983	3.438	0.9781
460.26			5.079	1.0061	5.168	1.0129	5.342	1.0114	4.919	1.0367	4.823	0.9983	5.28	0.9974	5.262	1	3.445	0.9801
460.46			5.044	0.9992	5.178	1.0149	5.346	1.0121	4.938	1.0407	4.85	1.0039	5.289	0.9991	5.282	1.0038	3.469	0.9869
460.66			5.034	0.9972	5.186	1.0165	5.363	1.0153	4.963	1.0459	4.877	1.0095	5.317	1.0043	5.314	1.0099	3.5	0.9957
460.85			5.032	0.9968	5.181	1.0155	5.362	1.0151	4.959	1.0451	4.874	1.0089	5.331	1.007	5.33	1.0129	3.519	1.0011
461.05			5.051	1.0006	5.208	1.0208	5.372	1.017	4.972	1.0478	4.861	1.0062	5.375	1.0153	5.339	1.0146	3.532	1.0048
461.25			5.037	0.9978	5.2	1.0192	5.377	1.018	4.999	1.0535	4.895	1.0132	5.419	1.0236	5.363	1.0192	3.557	1.0119
461.45			5.018	0.9941	5.195	1.0182	5.344	1.0117	4.965	1.0464	4.889	1.012	5.421	1.024	5.366	1.0198	3.554	1.0111
461.65			4.998	0.9901	5.166	1.0125	5.32	1.0072	4.931	1.0392	4.9	1.0143	5.444	1.0283	5.382	1.0228	3.583	1.0193
461.85			4.966	0.9838	5.139	1.0073	5.327	1.0085	4.929	1.0388	4.893	1.0128	5.418	1.0234	5.355	1.0177	3.599	1.0239
462.05			4.969	0.9844	5.152	1.0098	5.299	1.0032	4.931	1.0392	4.855	1.005	5.395	1.0191	5.362	1.019	3.607	1.0262
462.25			4.956	0.9818	5.111	1.0018	5.273	0.9983	4.936	1.0403	4.833	1.0004	5.367	1.0138	5.355	1.0177	3.572	1.0162
462.45			4.898	0.9703	5.044	0.9886	5.222	0.9886	4.87	1.0263	4.786	0.9907	5.35	1.0106	5.336	1.0141	3.557	1.0119
462.65			4.909	0.9725	5.025	0.9849	5.232	0.9905	4.858	1.0238	4.757	0.9847	5.319	1.0047	5.339	1.0146	3.536	1.006
462.85			4.884	0.9675	4.985	0.9771	5.181	0.9809	4.81	1.0137	4.737	0.9805	5.311	1.0032	5.31	1.0091	3.505	0.9972
463.05			4.868	0.9643	4.965	0.9731	5.172	0.9792	4.76	1.0032	4.722	0.9774	5.302	1.0015	5.282	1.0038	3.478	0.9895
463.25			4.819	0.9546	4.947	0.9696	5.128	0.9708	4.696	0.9897	4.696	0.9721	5.248	0.9913	5.23	0.9939	3.447	0.9807
463.45			4.8	0.9509	4.895	0.9594	5.09	0.9637	4.655	0.981	4.655	0.9636	5.205	0.9832	5.198	0.9878	3.411	0.9704
463.65			4.753	0.9416	4.845	0.9496	5.067	0.9593	4.612	0.972	4.671	0.9669	5.179	0.9783	5.186	0.9856	3.39	0.9644
463.84			4.748	0.9406	4.845	0.9496	5.073	0.9604	4.611	0.9718	4.644	0.9613	5.151	0.973	5.133	0.9755	3.375	0.9602
464.04			4.741	0.9392	4.831	0.9469	5.046	0.9553	4.6	0.9694	4.623	0.9569	5.17	0.9766	5.135	0.9759	3.352	0.9536
464.24			4.733	0.9376	4.817	0.9441	5.019	0.9502	4.591	0.9675	4.617	0.9557	5.159	0.9745	5.092	0.9677	3.316	0.9434
464.44			4.694	0.9299	4.786	0.9381	4.981	0.943	4.544	0.9576	4.597	0.9516	5.183	0.979	5.091	0.9675	3.318	0.944
464.64			4.715	0.934	4.788	0.9385	4.952	0.9375	4.548	0.9585	4.611	0.9545	5.166	0.9758	5.1	0.9692	3.306	0.9405
464.84			4.73	0.937	4.779	0.9367	4.96	0.939	4.525	0.9536	4.616	0.9555	5.167	0.976	5.052	0.9601	3.309	0.9414
465.04			4.721	0.9352	4.792	0.9392	4.981	0.943	4.549	0.9587	4.599	0.952	5.145	0.9719	5.038	0.9574	3.312	0.9422
465.24			4.712	0.9334	4.779	0.9367	4.933	0.9339	4.557	0.9604	4.591	0.9503	5.122	0.9675	5.027	0.9553	3.29	0.936
465.44			4.747	0.9404	4.776	0.9361	4.937	0.9347	4.601	0.9697	4.603	0.9528	5.124	0.9679	5.027	0.9553	3.304	0.94
465.64			4.744	0.9398	4.8	0.9408	4.927	0.9328	4.604	0.9703	4.612	0.9547	5.146	0.972	5.028	0.9555	3.335	0.9488
465.84			4.797	0.9503	4.848	0.9502	4.959	0.9388	4.649	0.9798	4.579	0.9478	5.137	0.9703	5.013	0.9527	3.342	0.9508
466.04			4.796	0.9501	4.85	0.9506	4.935	0.9343	4.644	0.9787	4.581	0.9483	5.129	0.9688	5.008	0.9517	3.305	0.9403
466.23			4.768	0.9445	4.847	0.95	4.916	0.9307	4.614	0.9724	4.555	0.9429	5.102	0.9637	4.993	0.9489	3.305	0.9403
466.43			4.754	0.9418	4.841	0.9488	4.904	0.9284	4.573	0.9638	4.542	0.9402	5.126	0.9683	5.013	0.9527	3.326	0.9462
466.63			4.774	0.9457	4.858	0.9522	4.93	0.9334	4.577	0.9646	4.554	0.9427	5.107	0.9647	5.015	0.9531	3.345	0.9516
466.83			4.771	0.9451	4.887	0.9579	4.964	0.9398	4.607	0.9709	4.525	0.9367	5.13	0.969	5.026	0.9552	3.371	0.959
467.03			4.736	0.9382	4.88	0.9565	4.937	0.9347	4.617	0.973	4.514	0.9344	5.125	0.9681	5.042	0.9582	3.343	0.9511
467.23			4.784	0.9477	4.888	0.9581	4.946	0.9364	4.621	0.9739	4.519	0.9354	5.145	0.9719	5.049	0.9595	3.341	0.9505
467.43			4.817	0.9542	4.916	0.9635	4.992	0.9451	4.636	0.977	4.525	0.9367	5.151	0.973	5.056	0.9609	3.354	0.9542
467.63			4.804	0.9517	4.896	0.9596	5.007	0.9479	4.638	0.9774	4.505	0.9325	5.146	0.972	5.053	0.9603	3.344	0.9514
467.83			4.805	0.9519	4.925	0.9653	5.042	0.9546	4.655	0.981	4.498	0.9311	5.144	0.9717	5.056	0.9609	3.329	0.9471
468.03			4.807	0.9523	4.896	0.9596	5.035	0.9532	4.653	0.9806	4.539	0.9396	5.158	0.9743	5.065	0.9626	3.33	0.9474
468.22			4.797	0.9503	4.88	0.9565	5.042	0.9546	4.676	0.9855	4.515	0.9346	5.166	0.9758	5.093	0.9679	3.336	0.9491
468.42			4.838	0.9584	4.884	0.9573	5.094	0.9644	4.707	0.992	4.518	0.9352	5.169	0.9764	5.107	0.9705	3.347	0.9522
468.62			4.846	0.96	4.865	0.9535	5.111	0.9676	4.725	0.9958	4.551	0.942	5.149	0.9726	5.134	0.9757	3.349	0.9528
468.82			4.861	0.963	4.88	0.9565	5.128	0.9708	4.764	1.004	4.549	0.9416	5.162	0.9751	5.109	0.9709	3.329	0.9471
469.02			4.863	0.9634	4.892	0.9588	5.114	0.9682	4.752	1.0015	4.563	0.9445	5.14	0.9709	5.096	0.9685	3.288	0.9354
469.22			4.87	0.9647	4.889	0.9583	5.163	0.9775	4.752	1.0015	4.553	0.9425	5.158	0.9743	5.109	0.9709	3.287	0.9351
469.42			4.849	0.9606	4.875	0.9555	5.169	0.9786	4.708	0.9922	4.55	0.9418	5.136	0.9702	5.124	0.9738	3.282	0.9337
469.62			4.846	0.96	4.852	0.951	5.144	0.9739	4.697	0.9899	4.55	0.9418	5.127	0.9685	5.128	0.9745	3.29	0.936
469.82			4.88	0.9667	4.875	0.9555	5.179	0.9805	4.724	0.9956	4.563	0.9445	5.129	0.9688	5.146	0.978	3.285	0.9346
470.01			4.925	0.9756	4.883	0.9571	5.206	0.9856	4.746	1.0002	4.567	0.9454	5.114	0.966	5.141	0.977	3.29	0.936
470.21			4.914	0.9735	4.918	0.9639	5.211	0.9866	4.733	0.9975	4.556	0.9431	5.126	0.9683	5.154	0.9795	3.287	0.9351
470.41			4.932	0.977	4.929	0.9661	5.217	0.9877	4.718	0.9943	4.565	0.9449	5.127	0.9685	5.168	0.9821	3.321	0.9448
470.61			4.953	0.9812	4.928	0.9659	5.204	0.9852	4.723	0.9954	4.597	0.9516	5.156	0.9739	5.182	0.9848	3.315	0.9431
470.81			4.949	0.9804	4.944	0.969	5.212	0.9867	4.733	0.9975	4.595	0.9511	5.181	0.9787	5.184	0.9852	3.337	0.9494
471.01			4.912	0.9731	4.917	0.9637	5.186	0.9818	4.722	0.9952	4.61	0.9543	5.176	0.9777	5.215	0.9911	3.347	0.9522
471.21			4.89	0.9687	4.884	0.9573	5.176	0.9799	4.71	0.9926	4.63	0.9584	5.186	0.9796	5.235	0.9949	3.381	0.9619
471.41			4.898	0.9703	4.898	0.96	5.105	0.9665	4.696	0.9897	4.655	0.9636	5.208	0.9838	5.255	0.9987	3.431	0.9761
471.61			4.897	0.9701	4.89	0.9584	5.067	0.9593	4.71	0.9926	4.657	0.964	5.205	0.9832	5.216	0.9913	3.455	0.9829
471.8			4.902	0.9711	4.92	0.9643	5.077	0.9612	4.726	0.996	4.66	0.9646	5.228	0.9875	5.273	1.0021	3.456	0.9832
472			4.876	0.9659	4.904	0.9612	5.033	0.9529	4.687	0.9878	4.649	0.9623	5.212	0.9845	5.269	1.0013	3.458	0.9838
472.2			4.849	0.9606	4.901	0.9606	5	0.9466	4.648	0.9796	4.648	0.9621	5.2	0.9822	5.28	1.0034	3.44	0.9787
472.4			4.808	0.9525	4.905	0.9614	4.994	0.9455	4.672	0.9846	4.631	0.9586	5.158	0.9743	5.27	1.0015	3.411	0.9704
472.6			4.811	0.9531	4.916	0.9635	5.009	0.9483	4.669	0.984	4.64	0.9605	5.133	0.9696	5.249	0.9975	3.388	0.9639
472.8			4.809	0.9527	4.92	0.9643	4.998	0.9462	4.69	0.9884	4.599	0.952	5.086	0.9607	5.203	0.9888	3.372	0.9593
473			4.837	0.9582	4.908	0.962	4.993	0.9453	4.701	0.9907	4.591	0.9503	5.08	0.9596	5.157	0.98	3.357	0.955
473.2			4.863	0.9634	4.939	0.9681	5.005	0.9476	4.71	0.9926	4.572	0.9464	5.083	0.9601	5.17	0.9825	3.366	0.9576
473.39			4.881	0.9669	4.947	0.9696	5.029	0.9521	4.716	0.9939	4.548	0.9414	5.061	0.956	5.142	0.9772	3.331	0.9477
473.59			4.86	0.9628	4.928	0.9659	5.034	0.953	4.739	0.9987	4.555	0.9429	5.057	0.9552	5.124	0.9738	3.313	0.9425
473.79			4.853	0.9614	4.958	0.9718	5.032	0.9527	4.777	1.0067	4.6	0.9522	5.088	0.9611	5.164	0.9814	3.315	0.9431
473.99			4.817	0.9542	4.916	0.9635	5.016	0.9496	4.743	0.9996	4.606	0.9534	5.08	0.9596	5.096	0.9685	3.298	0.9383
474.19			4.796	0.9501	4.905	0.9614	5.008	0.9481	4.737	0.9983	4.601	0.9524	5.107	0.9647	5.098	0.9688	3.31	0.9417
474.39			4.793	0.9495	4.915	0.9633	5.048	0.9557	4.776	1.0065	4.591	0.9503	5.12	0.9671	5.085	0.9664	3.325	0.9459
474.59			4.812	0.9532	4.859	0.9524	5.039	0.954	4.756	1.0023	4.606	0.9534	5.136	0.9702	5.091	0.9675	3.368	0.9582
474.78			4.812	0.9532	4.833	0.9473	5.034	0.953	4.76	1.0032	4.59	0.9501	5.148	0.9724	5.088	0.9669	3.353	0.9539
474.98			4.782	0.9473	4.833	0.9473	5	0.9466	4.716	0.9939	4.619	0.9561	5.2	0.9822	5.125	0.974	3.386	0.9633
475.18			4.748	0.9406	4.838	0.9483	4.992	0.9451	4.697	0.9899	4.644	0.9613	5.214	0.9849	5.161	0.9808	3.379	0.9613
475.38			4.739	0.9388	4.821	0.9449	4.988	0.9443	4.689	0.9882	4.635	0.9594	5.218	0.9856	5.123	0.9736	3.38	0.9616
475.58			4.712	0.9334	4.833	0.9473	4.981	0.943	4.703	0.9911	4.65	0.9625	5.242	0.9902	5.12	0.973	3.382	0.9622
475.78			4.74	0.939	4.871	0.9547	5.036	0.9534	4.69	0.9884	4.646	0.9617	5.241	0.99	5.113	0.9717	3.403	0.9681
475.98			4.747	0.9404	4.859	0.9524	5.06	0.958	4.674	0.985	4.601	0.9524	5.214	0.9849	5.086	0.9666	3.383	0.9624
476.17			4.783	0.9475	4.887	0.9579	5.081	0.9619	4.72	0.9947	4.626	0.9576	5.242	0.9902	5.131	0.9751	3.386	0.9633
476.37			4.819	0.9546	4.909	0.9622	5.125	0.9703	4.737	0.9983	4.635	0.9594	5.226	0.9872	5.144	0.9776	3.372	0.9593
476.57			4.799	0.9507	4.88	0.9565	5.106	0.9667	4.725	0.9958	4.666	0.9658	5.256	0.9928	5.178	0.984	3.392	0.965
476.77			4.807	0.9523	4.924	0.9651	5.089	0.9635	4.738	0.9985	4.661	0.9648	5.252	0.9921	5.147	0.9781	3.366	0.9576
476.97			4.815	0.9538	4.942	0.9686	5.069	0.9597	4.732	0.9973	4.676	0.9679	5.264	0.9943	5.187	0.9857	3.375	0.9602
477.17			4.841	0.959	4.951	0.9704	5.096	0.9648	4.729	0.9966	4.686	0.97	5.243	0.9904	5.225	0.993	3.384	0.9627
477.37			4.846	0.96	4.992	0.9784	5.1	0.9655	4.716	0.9939	4.649	0.9623	5.216	0.9853	5.21	0.9901	3.375	0.9602
477.56			4.855	0.9618	5.008	0.9816	5.094	0.9644	4.728	0.9964	4.665	0.9656	5.218	0.9856	5.228	0.9935	3.38	0.9616
477.76			4.883	0.9673	4.983	0.9767	5.121	0.9695	4.747	1.0004	4.673	0.9673	5.237	0.9892	5.245	0.9968	3.404	0.9684
477.96			4.887	0.9681	4.988	0.9777	5.102	0.9659	4.765	1.0042	4.68	0.9687	5.233	0.9885	5.246	0.997	3.394	0.9656
478.16			4.881	0.9669	4.992	0.9784	5.076	0.961	4.76	1.0032	4.701	0.9731	5.262	0.994	5.263	1.0002	3.393	0.9653
478.36			4.882	0.9671	5.025	0.9849	5.094	0.9644	4.76	1.0032	4.706	0.9741	5.232	0.9883	5.275	1.0025	3.41	0.9701
478.56			4.857	0.9622	4.991	0.9782	5.08	0.9618	4.743	0.9996	4.729	0.9789	5.254	0.9924	5.28	1.0034	3.437	0.9778
478.75			4.872	0.9651	5.035	0.9869	5.066	0.9591	4.755	1.0021	4.718	0.9766	5.222	0.9864	5.244	0.9966	3.423	0.9738
478.95			4.872	0.9651	5.02	0.9839	5.094	0.9644	4.746	1.0002	4.735	0.9801	5.24	0.9898	5.288	1.0049	3.441	0.9789
479.15			4.853	0.9614	5.018	0.9835	5.105	0.9665	4.753	1.0017	4.761	0.9855	5.248	0.9913	5.278	1.003	3.474	0.9883
479.35			4.842	0.9592	5.033	0.9865	5.109	0.9672	4.788	1.0091	4.75	0.9832	5.247	0.9911	5.276	1.0027	3.479	0.9898
479.55			4.875	0.9657	5.006	0.9812	5.122	0.9697	4.813	1.0143	4.791	0.9917	5.266	0.9947	5.272	1.0019	3.483	0.9909
479.75			4.867	0.9641	4.979	0.9759	5.131	0.9714	4.791	1.0097	4.792	0.9919	5.259	0.9934	5.279	1.0032	3.475	0.9886
479.94			4.876	0.9659	5.013	0.9826	5.112	0.9678	4.786	1.0086	4.792	0.9919	5.236	0.989	5.274	1.0023	3.481	0.9903
480.14			4.904	0.9715	5.027	0.9853	5.121	0.9695	4.784	1.0082	4.769	0.9872	5.205	0.9832	5.26	0.9996	3.448	0.9809
480.34			4.945	0.9796	5.064	0.9926	5.158	0.9765	4.754	1.0019	4.773	0.988	5.186	0.9796	5.237	0.9952	3.459	0.9841
480.54			4.947	0.98	5.037	0.9873	5.163	0.9775	4.769	1.0051	4.75	0.9832	5.184	0.9792	5.216	0.9913	3.469	0.9869
480.74			4.988	0.9881	5.069	0.9935	5.149	0.9748	4.785	1.0084	4.775	0.9884	5.224	0.9868	5.225	0.993	3.488	0.9923
480.94			5.013	0.9931	5.074	0.9945	5.177	0.9801	4.775	1.0063	4.775	0.9884	5.256	0.9928	5.237	0.9952	3.5	0.9957
481.13			5.012	0.9929	5.091	0.9978	5.159	0.9767	4.768	1.0048	4.747	0.9826	5.247	0.9911	5.237	0.9952	3.492	0.9935
481.33			5.008	0.9921	5.102	1	5.165	0.9778	4.77	1.0053	4.725	0.9781	5.248	0.9913	5.239	0.9956	3.466	0.9861
481.53			5.028	0.996	5.102	1	5.147	0.9744	4.728	0.9964	4.735	0.9801	5.265	0.9945	5.221	0.9922	3.451	0.9818
481.73			5.014	0.9933	5.111	1.0018	5.119	0.9691	4.703	0.9911	4.744	0.982	5.3	1.0011	5.281	1.0036	3.504	0.9969
481.93			5.035	0.9974	5.11	1.0016	5.118	0.969	4.705	0.9916	4.736	0.9803	5.302	1.0015	5.27	1.0015	3.533	1.0051
482.13			5.033	0.997	5.114	1.0024	5.095	0.9646	4.669	0.984	4.747	0.9826	5.33	1.0068	5.283	1.004	3.528	1.0037
482.32			5.051	1.0006	5.133	1.0061	5.087	0.9631	4.675	0.9852	4.758	0.9849	5.351	1.0108	5.33	1.0129	3.549	1.0097
482.52			5.065	1.0034	5.148	1.009	5.109	0.9672	4.713	0.9933	4.798	0.9932	5.413	1.0225	5.413	1.0287	3.576	1.0174
482.72			5.091	1.0085	5.169	1.0131	5.136	0.9724	4.735	0.9979	4.883	1.0108	5.475	1.0342	5.475	1.0405	3.607	1.0262
482.92			5.123	1.0149	5.235	1.0261	5.198	0.9841	4.766	1.0044	4.937	1.0219	5.504	1.0397	5.532	1.0513	3.627	1.0319
483.12			5.151	1.0204	5.261	1.0312	5.224	0.989	4.797	1.011	4.97	1.0288	5.542	1.0468	5.578	1.0601	3.639	1.0353
483.31			5.214	1.0329	5.296	1.038	5.3	1.0034	4.851	1.0223	5.024	1.04	5.606	1.0589	5.627	1.0694	3.688	1.0492
483.51			5.278	1.0456	5.356	1.0498	5.374	1.0174	4.929	1.0388	5.074	1.0503	5.654	1.068	5.681	1.0796	3.743	1.0649
483.71			5.314	1.0527	5.398	1.058	5.458	1.0333	4.992	1.0521	5.126	1.0611	5.692	1.0752	5.745	1.0918	3.787	1.0774
483.91			5.35	1.0598	5.441	1.0664	5.536	1.0481	5.064	1.0672	5.163	1.0687	5.732	1.0827	5.772	1.0969	3.798	1.0805
484.11			5.403	1.0703	5.505	1.079	5.616	1.0632	5.119	1.0788	5.207	1.0778	5.778	1.0914	5.825	1.107	3.807	1.0831
484.31			5.457	1.081	5.549	1.0876	5.685	1.0763	5.182	1.0921	5.255	1.0878	5.807	1.0969	5.874	1.1163	3.849	1.095
484.5			5.496	1.0887	5.581	1.0939	5.76	1.0905	5.252	1.1068	5.309	1.0989	5.873	1.1094	5.895	1.1203	3.882	1.1044
484.7			5.538	1.0971	5.61	1.0996	5.804	1.0988	5.307	1.1184	5.315	1.1002	5.891	1.1128	5.891	1.1195	3.884	1.105
484.9			5.578	1.105	5.673	1.1119	5.852	1.1079	5.34	1.1254	5.306	1.0983	5.894	1.1133	5.903	1.1218	3.895	1.1081
485.1			5.592	1.1078	5.677	1.1127	5.859	1.1092	5.349	1.1273	5.291	1.0952	5.904	1.1152	5.909	1.123	3.902	1.1101
485.3			5.594	1.1082	5.68	1.1133	5.858	1.109	5.364	1.1305	5.297	1.0965	5.906	1.1156	5.918	1.1247	3.92	1.1152
485.49			5.596	1.1086	5.693	1.1158	5.834	1.1045	5.364	1.1305	5.284	1.0938	5.878	1.1103	5.898	1.1209	3.893	1.1075
485.69			5.565	1.1024	5.651	1.1076	5.799	1.0979	5.306	1.1182	5.275	1.0919	5.862	1.1073	5.859	1.1135	3.864	1.0993
485.89			5.555	1.1004	5.634	1.1043	5.749	1.0884	5.29	1.1149	5.247	1.0861	5.853	1.1056	5.823	1.1066	3.838	1.0919
486.09			5.528	1.0951	5.621	1.1017	5.723	1.0835	5.251	1.1066	5.228	1.0822	5.842	1.1035	5.81	1.1041	3.84	1.0925
486.29			5.482	1.086	5.604	1.0984	5.668	1.0731	5.217	1.0995	5.219	1.0803	5.84	1.1031	5.802	1.1026	3.847	1.0945
486.48			5.49	1.0876	5.612	1.1	5.653	1.0702	5.212	1.0984	5.212	1.0789	5.848	1.1046	5.802	1.1026	3.828	1.089
486.68			5.472	1.084	5.59	1.0956	5.614	1.0629	5.163	1.0881	5.194	1.0751	5.828	1.1009	5.816	1.1053	3.838	1.0919
486.88			5.439	1.0775	5.577	1.0931	5.61	1.0621	5.138	1.0828	5.197	1.0758	5.827	1.1007	5.82	1.106	3.835	1.091
487.08			5.422	1.0741	5.541	1.086	5.592	1.0587	5.111	1.0771	5.19	1.0743	5.826	1.1005	5.797	1.1017	3.819	1.0865
487.28			5.413	1.0723	5.53	1.0839	5.586	1.0576	5.12	1.079	5.201	1.0766	5.814	1.0982	5.789	1.1002	3.82	1.0868
487.47			5.423	1.0743	5.53	1.0839	5.595	1.0593	5.113	1.0776	5.19	1.0743	5.791	1.0939	5.756	1.0939	3.795	1.0797
487.67			5.419	1.0735	5.508	1.0796	5.598	1.0598	5.105	1.0759	5.196	1.0756	5.792	1.0941	5.764	1.0954	3.811	1.0842
487.87			5.414	1.0725	5.505	1.079	5.594	1.0591	5.095	1.0738	5.195	1.0753	5.799	1.0954	5.769	1.0964	3.796	1.0799
488.07			5.397	1.0691	5.496	1.0772	5.586	1.0576	5.082	1.071	5.188	1.0739	5.777	1.0912	5.746	1.092	3.79	1.0782
488.26			5.393	1.0683	5.474	1.0729	5.567	1.054	5.083	1.0712	5.164	1.0689	5.763	1.0886	5.726	1.0882	3.756	1.0686
488.46			5.401	1.0699	5.466	1.0713	5.569	1.0543	5.08	1.0706	5.146	1.0652	5.735	1.0833	5.711	1.0853	3.731	1.0615
488.66			5.359	1.0616	5.436	1.0655	5.551	1.0509	5.062	1.0668	5.107	1.0571	5.684	1.0737	5.671	1.0777	3.728	1.0606
488.86			5.35	1.0598	5.428	1.0639	5.556	1.0519	5.055	1.0653	5.1	1.0557	5.655	1.0682	5.636	1.0711	3.692	1.0504
489.06			5.342	1.0582	5.414	1.0612	5.534	1.0477	5.036	1.0613	5.075	1.0505	5.623	1.0621	5.606	1.0654	3.681	1.0472
489.25			5.331	1.0561	5.398	1.058	5.504	1.042	5.021	1.0582	5.033	1.0418	5.588	1.0555	5.576	1.0597	3.65	1.0384
489.45			5.301	1.0501	5.371	1.0527	5.472	1.036	4.983	1.0502	4.961	1.0269	5.546	1.0476	5.524	1.0498	3.59	1.0213
489.65			5.253	1.0406	5.337	1.0461	5.415	1.0252	4.935	1.04	4.946	1.0238	5.541	1.0467	5.524	1.0498	3.597	1.0233
489.85			5.216	1.0333	5.313	1.0414	5.371	1.0168	4.883	1.0291	4.905	1.0153	5.513	1.0414	5.483	1.042	3.556	1.0117
490.05			5.185	1.0271	5.315	1.0417	5.336	1.0102	4.878	1.028	4.862	1.0064	5.466	1.0325	5.443	1.0344	3.554	1.0111
490.24			5.166	1.0234	5.297	1.0382	5.31	1.0053	4.844	1.0209	4.852	1.0043	5.458	1.031	5.444	1.0346	3.548	1.0094
490.44			5.154	1.021	5.282	1.0353	5.293	1.0021	4.813	1.0143	4.875	1.0091	5.428	1.0253	5.435	1.0329	3.555	1.0114
490.64			5.129	1.016	5.263	1.0316	5.257	0.9953	4.779	1.0072	4.878	1.0097	5.435	1.0266	5.451	1.0359	3.566	1.0145
490.84			5.137	1.0176	5.252	1.0294	5.267	0.9972	4.788	1.0091	4.879	1.0099	5.45	1.0295	5.44	1.0338	3.561	1.0131
491.03			5.152	1.0206	5.257	1.0304	5.269	0.9975	4.784	1.0082	4.881	1.0103	5.449	1.0293	5.463	1.0382	3.573	1.0165
491.23			5.166	1.0234	5.258	1.0306	5.266	0.997	4.816	1.015	4.897	1.0137	5.433	1.0263	5.473	1.0401	3.573	1.0165
491.43			5.15	1.0202	5.253	1.0296	5.284	1.0004	4.836	1.0192	4.918	1.018	5.455	1.0304	5.504	1.046	3.601	1.0245
491.63			5.163	1.0228	5.268	1.0325	5.302	1.0038	4.855	1.0232	4.976	1.03	5.484	1.0359	5.546	1.054	3.659	1.041
491.82			5.194	1.0289	5.301	1.039	5.348	1.0125	4.908	1.0344	4.994	1.0337	5.501	1.0391	5.551	1.0549	3.661	1.0415
492.02			5.204	1.0309	5.324	1.0435	5.381	1.0187	4.947	1.0426	5.017	1.0385	5.526	1.0438	5.569	1.0583	3.69	1.0498
492.22			5.228	1.0357	5.329	1.0445	5.408	1.0239	4.956	1.0445	5.051	1.0455	5.554	1.0491	5.6	1.0642	3.701	1.0529
492.42			5.254	1.0408	5.357	1.05	5.444	1.0307	4.992	1.0521	5.06	1.0474	5.583	1.0546	5.625	1.069	3.706	1.0543
492.61			5.268	1.0436	5.375	1.0535	5.432	1.0284	4.988	1.0512	5.053	1.046	5.604	1.0586	5.65	1.0737	3.707	1.0546
492.81			5.297	1.0493	5.369	1.0523	5.464	1.0345	5.027	1.0594	5.056	1.0466	5.597	1.0572	5.635	1.0709	3.706	1.0543
493.01			5.295	1.0489	5.375	1.0535	5.445	1.0309	5.005	1.0548	5.069	1.0493	5.602	1.0582	5.654	1.0745	3.71	1.0555
493.21			5.253	1.0406	5.356	1.0498	5.417	1.0256	4.998	1.0533	5.07	1.0495	5.606	1.0589	5.636	1.0711	3.7	1.0526
493.41			5.237	1.0374	5.371	1.0527	5.427	1.0275	4.976	1.0487	5.067	1.0489	5.656	1.0684	5.624	1.0688	3.708	1.0549
493.6			5.243	1.0386	5.374	1.0533	5.401	1.0225	4.95	1.0432	5.051	1.0455	5.624	1.0623	5.587	1.0618	3.682	1.0475
493.8			5.232	1.0365	5.343	1.0472	5.364	1.0155	4.921	1.0371	4.996	1.0342	5.611	1.0599	5.539	1.0526	3.632	1.0333
494			5.231	1.0363	5.323	1.0433	5.351	1.0131	4.866	1.0255	4.964	1.0275	5.584	1.0548	5.528	1.0506	3.622	1.0304
494.2			5.17	1.0242	5.272	1.0333	5.295	1.0025	4.835	1.019	4.937	1.0219	5.56	1.0502	5.502	1.0456	3.6	1.0242
494.39			5.151	1.0204	5.235	1.0261	5.245	0.993	4.797	1.011	4.897	1.0137	5.54	1.0465	5.481	1.0416	3.591	1.0216
494.59			5.131	1.0164	5.205	1.0202	5.21	0.9864	4.77	1.0053	4.871	1.0083	5.497	1.0383	5.433	1.0325	3.572	1.0162
494.79			5.116	1.0135	5.18	1.0153	5.195	0.9835	4.761	1.0034	4.839	1.0017	5.473	1.0338	5.401	1.0264	3.561	1.0131
494.99			5.078	1.0059	5.174	1.0141	5.166	0.978	4.722	0.9952	4.835	1.0008	5.476	1.0344	5.391	1.0245	3.558	1.0122
495.18			5.055	1.0014	5.135	1.0065	5.141	0.9733	4.695	0.9895	4.814	0.9965	5.468	1.0329	5.359	1.0184	3.516	1.0003
495.38			5.049	1.0002	5.145	1.0084	5.147	0.9744	4.681	0.9865	4.79	0.9915	5.453	1.03	5.34	1.0148	3.511	0.9989
495.58			5.023	0.995	5.109	1.0014	5.097	0.965	4.627	0.9751	4.778	0.989	5.389	1.0179	5.338	1.0144	3.497	0.9949
495.78			4.984	0.9873	5.101	0.9998	5.088	0.9633	4.613	0.9722	4.777	0.9888	5.382	1.0166	5.342	1.0152	3.532	1.0048
495.97			4.963	0.9832	5.113	1.0022	5.097	0.965	4.605	0.9705	4.775	0.9884	5.361	1.0127	5.356	1.0179	3.531	1.0046
496.17			4.92	0.9746	5.075	0.9947	5.041	0.9544	4.616	0.9728	4.788	0.9911	5.33	1.0068	5.326	1.0122	3.497	0.9949
496.37			4.956	0.9818	5.089	0.9975	5.037	0.9536	4.604	0.9703	4.8	0.9936	5.3	1.0011	5.336	1.0141	3.494	0.994
496.56			4.945	0.9796	5.071	0.9939	5.026	0.9515	4.614	0.9724	4.793	0.9921	5.278	0.997	5.331	1.0131	3.454	0.9826
496.76			4.919	0.9744	5.039	0.9877	5.009	0.9483	4.595	0.9684	4.802	0.994	5.293	0.9998	5.341	1.015	3.453	0.9824
496.96			4.932	0.977	5.057	0.9912	5.049	0.9559	4.606	0.9707	4.814	0.9965	5.285	0.9983	5.323	1.0116	3.466	0.9861
497.16			4.95	0.9806	5.038	0.9875	5.05	0.9561	4.602	0.9699	4.807	0.995	5.26	0.9936	5.274	1.0023	3.446	0.9804
497.35			4.937	0.978	5.034	0.9867	5.056	0.9572	4.576	0.9644	4.809	0.9954	5.262	0.994	5.287	1.0048	3.469	0.9869
497.55			4.917	0.974	5.001	0.9802	5.006	0.9477	4.564	0.9619	4.811	0.9959	5.25	0.9917	5.301	1.0074	3.469	0.9869
497.75			4.923	0.9752	5.011	0.9822	5.001	0.9468	4.582	0.9656	4.757	0.9847	5.258	0.9932	5.29	1.0053	3.454	0.9826
497.95			4.941	0.9788	4.991	0.9782	5.005	0.9476	4.572	0.9635	4.752	0.9836	5.274	0.9962	5.273	1.0021	3.428	0.9752
498.14			4.937	0.978	4.972	0.9745	5.002	0.947	4.586	0.9665	4.783	0.9901	5.275	0.9964	5.256	0.9989	3.439	0.9784
498.34			4.961	0.9828	4.984	0.9769	5.064	0.9587	4.587	0.9667	4.792	0.9919	5.295	1.0002	5.288	1.0049	3.468	0.9866
498.54			4.968	0.9842	4.986	0.9773	5.06	0.958	4.595	0.9684	4.782	0.9899	5.303	1.0017	5.269	1.0013	3.457	0.9835
498.74			4.984	0.9873	5.02	0.9839	5.116	0.9686	4.614	0.9724	4.787	0.9909	5.315	1.004	5.26	0.9996	3.48	0.99
498.93			4.996	0.9897	5.05	0.9898	5.153	0.9756	4.642	0.9783	4.769	0.9872	5.272	0.9958	5.241	0.996	3.479	0.9898
499.13			4.998	0.9901	5.024	0.9847	5.149	0.9748	4.657	0.9815	4.769	0.9872	5.267	0.9949	5.256	0.9989	3.46	0.9844
499.33			4.989	0.9883	5.051	0.99	5.177	0.9801	4.678	0.9859	4.739	0.981	5.256	0.9928	5.264	1.0004	3.458	0.9838
499.52			4.997	0.9899	5.08	0.9957	5.202	0.9849	4.699	0.9903	4.772	0.9878	5.267	0.9949	5.262	1	3.472	0.9878
499.72			5.035	0.9974	5.109	1.0014	5.262	0.9962	4.736	0.9981	4.778	0.989	5.285	0.9983	5.252	0.9981	3.487	0.992
499.92			5.046	0.9996	5.084	0.9965	5.297	1.0028	4.733	0.9975	4.831	1	5.284	0.9981	5.252	0.9981	3.529	1.004
500.12			5.048	1	5.102	1	5.282	1	4.745	1	4.831	1	5.294	1	5.262	1	3.515	1
500.31			5.083	1.0069	5.112	1.002	5.331	1.0093	4.782	1.0078	4.802	0.994	5.3	1.0011	5.263	1.0002	3.527	1.0034
500.51			5.047	0.9998	5.111	1.0018	5.297	1.0028	4.762	1.0036	4.805	0.9946	5.293	0.9998	5.265	1.0006	3.528	1.0037
500.71			5.045	0.9994	5.115	1.0025	5.322	1.0076	4.788	1.0091	4.794	0.9923	5.31	1.003	5.263	1.0002	3.541	1.0074
500.9			5.014	0.9933	5.099	0.9994	5.3	1.0034	4.774	1.0061	4.82	0.9977	5.317	1.0043	5.278	1.003	3.563	1.0137
501.1			5	0.9905	5.046	0.989	5.256	0.9951	4.743	0.9996	4.826	0.999	5.328	1.0064	5.275	1.0025	3.56	1.0128
501.3			4.979	0.9863	5.048	0.9894	5.25	0.9939	4.73	0.9968	4.825	0.9988	5.345	1.0096	5.264	1.0004	3.568	1.0151
501.5			4.949	0.9804	4.999	0.9798	5.184	0.9814	4.708	0.9922	4.829	0.9996	5.348	1.0102	5.254	0.9985	3.572	1.0162
501.69			4.929	0.9764	4.951	0.9704	5.129	0.971	4.73	0.9968	4.768	0.987	5.318	1.0045	5.243	0.9964	3.579	1.0182
501.89			4.892	0.9691	4.924	0.9651	5.09	0.9637	4.694	0.9893	4.733	0.9797	5.288	0.9989	5.228	0.9935	3.55	1.01
502.09			4.855	0.9618	4.925	0.9653	5.062	0.9583	4.693	0.989	4.709	0.9747	5.292	0.9996	5.22	0.992	3.528	1.0037
502.28			4.876	0.9659	4.908	0.962	5.073	0.9604	4.719	0.9945	4.693	0.9714	5.241	0.99	5.216	0.9913	3.51	0.9986
502.48			4.831	0.957	4.88	0.9565	5.031	0.9525	4.642	0.9783	4.704	0.9737	5.218	0.9856	5.21	0.9901	3.499	0.9954
502.68			4.846	0.96	4.865	0.9535	5.009	0.9483	4.643	0.9785	4.687	0.9702	5.22	0.986	5.183	0.985	3.52	1.0014
502.88			4.822	0.9552	4.868	0.9541	5.052	0.9565	4.64	0.9779	4.674	0.9675	5.185	0.9794	5.148	0.9783	3.493	0.9937
503.07			4.851	0.961	4.893	0.959	5.066	0.9591	4.665	0.9831	4.645	0.9615	5.175	0.9775	5.152	0.9791	3.503	0.9966
503.27			4.834	0.9576	4.946	0.9694	5.072	0.9602	4.674	0.985	4.675	0.9677	5.169	0.9764	5.147	0.9781	3.526	1.0031
503.47			4.836	0.958	4.963	0.9728	5.065	0.9589	4.695	0.9895	4.66	0.9646	5.137	0.9703	5.129	0.9747	3.511	0.9989
503.66			4.839	0.9586	4.983	0.9767	5.113	0.968	4.731	0.997	4.669	0.9665	5.156	0.9739	5.138	0.9764	3.495	0.9943
503.86			4.862	0.9632	5.025	0.9849	5.157	0.9763	4.746	1.0002	4.68	0.9687	5.151	0.973	5.153	0.9793	3.451	0.9818
504.06			4.877	0.9661	5.04	0.9878	5.178	0.9803	4.802	1.012	4.674	0.9675	5.162	0.9751	5.165	0.9816	3.414	0.9713
504.25			4.89	0.9687	5.031	0.9861	5.202	0.9849	4.813	1.0143	4.685	0.9698	5.167	0.976	5.186	0.9856	3.414	0.9713
504.45			4.881	0.9669	5.032	0.9863	5.207	0.9858	4.816	1.015	4.686	0.97	5.181	0.9787	5.189	0.9861	3.448	0.9809
504.65			4.909	0.9725	5.065	0.9927	5.222	0.9886	4.857	1.0236	4.657	0.964	5.187	0.9798	5.191	0.9865	3.406	0.969
504.85			4.913	0.9733	5.096	0.9988	5.257	0.9953	4.9	1.0327	4.647	0.9619	5.179	0.9783	5.211	0.9903	3.375	0.9602
505.04			4.935	0.9776	5.098	0.9992	5.195	0.9835	4.907	1.0341	4.648	0.9621	5.2	0.9822	5.238	0.9954	3.375	0.9602
505.24			4.958	0.9822	5.069	0.9935	5.197	0.9839	4.887	1.0299	4.627	0.9578	5.159	0.9745	5.174	0.9833	3.346	0.9519
505.44			4.947	0.98	5.036	0.9871	5.208	0.986	4.901	1.0329	4.599	0.952	5.16	0.9747	5.171	0.9827	3.328	0.9468
505.63			4.952	0.981	5.025	0.9849	5.22	0.9883	4.886	1.0297	4.592	0.9505	5.167	0.976	5.199	0.988	3.335	0.9488
505.83			4.987	0.9879	5.03	0.9859	5.2	0.9845	4.878	1.028	4.606	0.9534	5.145	0.9719	5.222	0.9924	3.341	0.9505
506.03			5	0.9905	4.998	0.9796	5.225	0.9892	4.874	1.0272	4.618	0.9559	5.13	0.969	5.202	0.9886	3.352	0.9536
506.22			4.984	0.9873	4.982	0.9765	5.192	0.983	4.832	1.0183	4.649	0.9623	5.124	0.9679	5.173	0.9831	3.373	0.9596
506.42			4.998	0.9901	4.992	0.9784	5.186	0.9818	4.836	1.0192	4.656	0.9638	5.108	0.9649	5.159	0.9804	3.378	0.961
506.62			4.998	0.9901	4.979	0.9759	5.16	0.9769	4.839	1.0198	4.662	0.965	5.124	0.9679	5.171	0.9827	3.364	0.957
506.81			4.98	0.9865	4.932	0.9667	5.143	0.9737	4.819	1.0156	4.684	0.9696	5.124	0.9679	5.168	0.9821	3.384	0.9627
507.01			4.991	0.9887	4.914	0.9632	5.166	0.978	4.808	1.0133	4.682	0.9692	5.111	0.9654	5.123	0.9736	3.377	0.9607
507.21			4.987	0.9879	4.919	0.9641	5.208	0.986	4.802	1.012	4.664	0.9654	5.096	0.9626	5.123	0.9736	3.343	0.9511
507.4			4.954	0.9814	4.951	0.9704	5.205	0.9854	4.798	1.0112	4.676	0.9679	5.098	0.963	5.148	0.9783	3.334	0.9485
507.6			5.008	0.9921	4.963	0.9728	5.229	0.99	4.802	1.012	4.649	0.9623	5.112	0.9656	5.156	0.9799	3.338	0.9496
507.8			5.028	0.996	4.978	0.9757	5.229	0.99	4.802	1.012	4.681	0.969	5.146	0.972	5.159	0.9804	3.355	0.9545
507.99			4.997	0.9899	4.983	0.9767	5.233	0.9907	4.797	1.011	4.667	0.9661	5.157	0.9741	5.16	0.9806	3.353	0.9539
508.19			4.981	0.9867	4.993	0.9786	5.191	0.9828	4.8	1.0116	4.647	0.9619	5.179	0.9783	5.177	0.9838	3.342	0.9508
508.39			5.003	0.9911	4.999	0.9798	5.223	0.9888	4.813	1.0143	4.627	0.9578	5.178	0.9781	5.178	0.984	3.335	0.9488
508.58			5.012	0.9929	5.008	0.9816	5.235	0.9911	4.835	1.019	4.654	0.9634	5.196	0.9815	5.198	0.9878	3.358	0.9553
508.78			5.006	0.9917	5.007	0.9814	5.26	0.9958	4.847	1.0215	4.683	0.9694	5.2	0.9822	5.185	0.9854	3.363	0.9568
508.98			5.029	0.9962	5.052	0.9902	5.287	1.0009	4.897	1.032	4.696	0.9721	5.202	0.9826	5.184	0.9852	3.381	0.9619
509.17			5.031	0.9966	5.067	0.9931	5.267	0.9972	4.897	1.032	4.712	0.9754	5.221	0.9862	5.207	0.9895	3.393	0.9653
509.37			5.016	0.9937	5.054	0.9906	5.244	0.9928	4.888	1.0301	4.73	0.9791	5.239	0.9896	5.216	0.9913	3.43	0.9758
509.57			5.008	0.9921	5.024	0.9847	5.22	0.9883	4.91	1.0348	4.734	0.9799	5.287	0.9987	5.261	0.9998	3.433	0.9767
509.76			4.971	0.9847	5.004	0.9808	5.204	0.9852	4.898	1.0322	4.746	0.9824	5.274	0.9962	5.272	1.0019	3.418	0.9724
509.96			4.965	0.9836	4.987	0.9775	5.233	0.9907	4.914	1.0356	4.744	0.982	5.256	0.9928	5.264	1.0004	3.397	0.9664
510.16			4.96	0.9826	5.009	0.9818	5.268	0.9973	4.937	1.0405	4.751	0.9834	5.28	0.9974	5.248	0.9973	3.385	0.963
510.35			4.953	0.9812	5.045	0.9888	5.336	1.0102	4.949	1.043	4.76	0.9853	5.282	0.9977	5.258	0.9992	3.4	0.9673
510.55			4.937	0.978	5.07	0.9937	5.341	1.0112	4.952	1.0436	4.778	0.989	5.298	1.0008	5.257	0.999	3.409	0.9698
510.75			4.911	0.9729	5.081	0.9959	5.341	1.0112	4.928	1.0386	4.741	0.9814	5.278	0.997	5.217	0.9914	3.38	0.9616
510.94			4.9	0.9707	5.091	0.9978	5.34	1.011	4.907	1.0341	4.723	0.9776	5.25	0.9917	5.257	0.999	3.388	0.9639
511.14			4.883	0.9673	5.056	0.991	5.316	1.0064	4.882	1.0289	4.708	0.9745	5.249	0.9915	5.26	0.9996	3.391	0.9647
511.34			4.879	0.9665	5.039	0.9877	5.319	1.007	4.869	1.0261	4.703	0.9735	5.263	0.9941	5.269	1.0013	3.397	0.9664
511.53			4.885	0.9677	5.026	0.9851	5.326	1.0083	4.866	1.0255	4.691	0.971	5.253	0.9923	5.267	1.001	3.39	0.9644
511.73			4.909	0.9725	5.016	0.9831	5.339	1.0108	4.845	1.0211	4.667	0.9661	5.222	0.9864	5.22	0.992	3.379	0.9613
511.93			4.929	0.9764	5.042	0.9882	5.354	1.0136	4.844	1.0209	4.702	0.9733	5.229	0.9877	5.24	0.9958	3.396	0.9661
512.12			4.876	0.9659	5.016	0.9831	5.318	1.0068	4.826	1.0171	4.684	0.9696	5.207	0.9836	5.228	0.9935	3.385	0.963
512.32			4.898	0.9703	5.009	0.9818	5.302	1.0038	4.828	1.0175	4.68	0.9687	5.172	0.977	5.22	0.992	3.409	0.9698
512.52			4.882	0.9671	4.973	0.9747	5.26	0.9958	4.812	1.0141	4.684	0.9696	5.171	0.9768	5.189	0.9861	3.426	0.9747
512.71			4.885	0.9677	4.937	0.9677	5.241	0.9922	4.805	1.0126	4.699	0.9727	5.147	0.9722	5.209	0.9899	3.442	0.9792
512.91			4.919	0.9744	4.935	0.9673	5.275	0.9987	4.832	1.0183	4.71	0.975	5.147	0.9722	5.22	0.992	3.432	0.9764
513.11			4.939	0.9784	4.952	0.9706	5.307	1.0047	4.854	1.023	4.699	0.9727	5.141	0.9711	5.168	0.9821	3.412	0.9707
513.3			4.919	0.9744	4.978	0.9757	5.338	1.0106	4.878	1.028	4.704	0.9737	5.15	0.9728	5.177	0.9838	3.394	0.9656
513.5			4.881	0.9669	4.958	0.9718	5.329	1.0089	4.87	1.0263	4.692	0.9712	5.15	0.9728	5.181	0.9846	3.407	0.9693
513.69			4.855	0.9618	4.978	0.9757	5.364	1.0155	4.852	1.0226	4.711	0.9752	5.142	0.9713	5.169	0.9823	3.402	0.9679
513.89			4.838	0.9584	5.016	0.9831	5.406	1.0235	4.891	1.0308	4.738	0.9807	5.119	0.9669	5.176	0.9837	3.4	0.9673
514.09			4.817	0.9542	5.026	0.9851	5.401	1.0225	4.925	1.0379	4.706	0.9741	5.082	0.96	5.148	0.9783	3.368	0.9582
514.28			4.831	0.957	5.059	0.9916	5.425	1.0271	4.95	1.0432	4.702	0.9733	5.09	0.9615	5.158	0.9802	3.404	0.9684
514.48			4.807	0.9523	5.041	0.988	5.4	1.0223	4.946	1.0424	4.691	0.971	5.08	0.9596	5.162	0.981	3.379	0.9613
514.68			4.78	0.9469	5.022	0.9843	5.372	1.017	4.935	1.04	4.688	0.9704	5.072	0.9581	5.136	0.9761	3.34	0.9502
514.87			4.775	0.9459	5.041	0.988	5.399	1.0222	4.943	1.0417	4.658	0.9642	5.088	0.9611	5.124	0.9738	3.344	0.9514
515.07			4.754	0.9418	5.028	0.9855	5.361	1.015	4.942	1.0415	4.623	0.9569	5.05	0.9539	5.114	0.9719	3.334	0.9485
515.27			4.755	0.942	4.985	0.9771	5.324	1.008	4.941	1.0413	4.616	0.9555	5.056	0.955	5.09	0.9673	3.354	0.9542
515.46			4.768	0.9445	4.971	0.9743	5.314	1.0061	4.941	1.0413	4.586	0.9493	5.02	0.9482	5.066	0.9628	3.311	0.942
515.66			4.771	0.9451	4.976	0.9753	5.317	1.0066	4.918	1.0365	4.572	0.9464	5.01	0.9464	5.043	0.9584	3.278	0.9326
515.85			4.78	0.9469	4.965	0.9731	5.259	0.9956	4.92	1.0369	4.549	0.9416	5.012	0.9467	5.052	0.9601	3.275	0.9317
516.05			4.747	0.9404	4.947	0.9696	5.208	0.986	4.889	1.0303	4.55	0.9418	5.047	0.9533	5.071	0.9637	3.305	0.9403
516.25			4.765	0.9439	4.941	0.9684	5.209	0.9862	4.866	1.0255	4.545	0.9408	5.056	0.955	5.069	0.9633	3.324	0.9457
516.44			4.776	0.9461	4.925	0.9653	5.214	0.9871	4.853	1.0228	4.533	0.9383	5.06	0.9558	5.064	0.9624	3.304	0.94
516.64			4.809	0.9527	4.892	0.9588	5.237	0.9915	4.833	1.0185	4.536	0.9389	5.062	0.9562	5.059	0.9614	3.318	0.944
516.84			4.834	0.9576	4.894	0.9592	5.252	0.9943	4.825	1.0169	4.51	0.9336	5.039	0.9518	5.093	0.9679	3.339	0.9499
517.03			4.831	0.957	4.91	0.9624	5.233	0.9907	4.817	1.0152	4.506	0.9327	5.055	0.9549	5.092	0.9677	3.316	0.9434
517.23			4.823	0.9554	4.916	0.9635	5.244	0.9928	4.797	1.011	4.558	0.9435	5.108	0.9649	5.125	0.974	3.348	0.9525
517.42			4.82	0.9548	4.949	0.97	5.27	0.9977	4.772	1.0057	4.561	0.9441	5.117	0.9666	5.127	0.9743	3.331	0.9477
517.62			4.835	0.9578	4.951	0.9704	5.268	0.9973	4.766	1.0044	4.56	0.9439	5.123	0.9677	5.134	0.9757	3.342	0.9508
517.82			4.863	0.9634	4.946	0.9694	5.249	0.9938	4.776	1.0065	4.581	0.9483	5.145	0.9719	5.16	0.9806	3.37	0.9587
518.01			4.889	0.9685	4.968	0.9737	5.312	1.0057	4.823	1.0164	4.595	0.9511	5.157	0.9741	5.176	0.9837	3.399	0.967
518.21			4.937	0.978	4.948	0.9698	5.329	1.0089	4.832	1.0183	4.624	0.9572	5.17	0.9766	5.211	0.9903	3.384	0.9627
518.4			4.957	0.982	4.961	0.9724	5.357	1.0142	4.857	1.0236	4.625	0.9574	5.207	0.9836	5.228	0.9935	3.409	0.9698
518.6			4.982	0.9869	4.998	0.9796	5.354	1.0136	4.868	1.0259	4.659	0.9644	5.248	0.9913	5.241	0.996	3.432	0.9764
518.8			4.975	0.9855	5.045	0.9888	5.36	1.0148	4.895	1.0316	4.691	0.971	5.296	1.0004	5.264	1.0004	3.452	0.9821
518.99			4.991	0.9887	5.09	0.9976	5.383	1.0191	4.933	1.0396	4.713	0.9756	5.341	1.0089	5.263	1.0002	3.456	0.9832
519.19			5.024	0.9952	5.092	0.998	5.405	1.0233	4.962	1.0457	4.729	0.9789	5.359	1.0123	5.291	1.0055	3.467	0.9863
519.38			5.055	1.0014	5.111	1.0018	5.404	1.0231	4.986	1.0508	4.712	0.9754	5.345	1.0096	5.286	1.0046	3.49	0.9929
519.58			5.078	1.0059	5.126	1.0047	5.429	1.0278	5.02	1.058	4.735	0.9801	5.382	1.0166	5.357	1.0181	3.524	1.0026
519.78			5.096	1.0095	5.153	1.01	5.438	1.0295	5.014	1.0567	4.797	0.993	5.42	1.0238	5.384	1.0232	3.565	1.0142
519.97			5.109	1.0121	5.182	1.0157	5.468	1.0352	5.062	1.0668	4.815	0.9967	5.388	1.0178	5.389	1.0241	3.562	1.0134
520.17			5.093	1.0089	5.185	1.0163	5.445	1.0309	5.055	1.0653	4.839	1.0017	5.41	1.0219	5.383	1.023	3.582	1.0191
520.36			5.106	1.0115	5.202	1.0196	5.463	1.0343	5.053	1.0649	4.811	0.9959	5.401	1.0202	5.344	1.0156	3.588	1.0208
520.56			5.121	1.0145	5.186	1.0165	5.453	1.0324	5.019	1.0577	4.829	0.9996	5.406	1.0212	5.348	1.0163	3.585	1.0199
520.76			5.123	1.0149	5.174	1.0141	5.452	1.0322	5.021	1.0582	4.794	0.9923	5.344	1.0094	5.335	1.0139	3.554	1.0111
520.95			5.118	1.0139	5.151	1.0096	5.436	1.0292	4.998	1.0533	4.788	0.9911	5.321	1.0051	5.339	1.0146	3.565	1.0142
521.15			5.114	1.0131	5.144	1.0082	5.42	1.0261	4.955	1.0443	4.798	0.9932	5.308	1.0026	5.35	1.0167	3.539	1.0068
521.34			5.087	1.0077	5.129	1.0053	5.386	1.0197	4.932	1.0394	4.79	0.9915	5.284	0.9981	5.349	1.0165	3.564	1.0139
521.54			5.071	1.0046	5.112	1.002	5.352	1.0133	4.892	1.031	4.794	0.9923	5.295	1.0002	5.361	1.0188	3.542	1.0077
521.74			5.035	0.9974	5.08	0.9957	5.294	1.0023	4.866	1.0255	4.795	0.9925	5.282	0.9977	5.351	1.0169	3.543	1.008
521.93			5.033	0.997	5.086	0.9969	5.281	0.9998	4.861	1.0244	4.775	0.9884	5.268	0.9951	5.336	1.0141	3.548	1.0094
522.13			5.017	0.9939	5.08	0.9957	5.286	1.0008	4.809	1.0135	4.739	0.981	5.279	0.9972	5.315	1.0101	3.53	1.0043
522.32			5.022	0.9948	5.037	0.9873	5.279	0.9994	4.776	1.0065	4.737	0.9805	5.287	0.9987	5.342	1.0152	3.519	1.0011
522.52			4.997	0.9899	5.039	0.9877	5.255	0.9949	4.745	1	4.765	0.9863	5.303	1.0017	5.367	1.02	3.529	1.004
522.72			4.953	0.9812	5.033	0.9865	5.214	0.9871	4.749	1.0008	4.753	0.9839	5.314	1.0038	5.35	1.0167	3.506	0.9974
522.91			4.933	0.9772	5.02	0.9839	5.193	0.9832	4.7	0.9905	4.737	0.9805	5.309	1.0028	5.343	1.0154	3.523	1.0023
523.11			4.919	0.9744	5	0.98	5.166	0.978	4.656	0.9812	4.72	0.977	5.312	1.0034	5.348	1.0163	3.507	0.9977
523.3			4.923	0.9752	4.985	0.9771	5.135	0.9722	4.643	0.9785	4.723	0.9776	5.277	0.9968	5.333	1.0135	3.5	0.9957
523.5			4.909	0.9725	4.964	0.973	5.085	0.9627	4.615	0.9726	4.716	0.9762	5.273	0.996	5.287	1.0048	3.472	0.9878
523.7			4.895	0.9697	4.944	0.969	5.07	0.9599	4.624	0.9745	4.723	0.9776	5.294	1	5.284	1.0042	3.479	0.9898
523.89			4.915	0.9737	4.986	0.9773	5.079	0.9616	4.659	0.9819	4.729	0.9789	5.278	0.997	5.242	0.9962	3.438	0.9781
524.09			4.889	0.9685	4.945	0.9692	5.051	0.9563	4.631	0.976	4.719	0.9768	5.283	0.9979	5.253	0.9983	3.438	0.9781
524.28			4.89	0.9687	4.933	0.9669	5.042	0.9546	4.647	0.9793	4.761	0.9855	5.307	1.0025	5.282	1.0038	3.449	0.9812
524.48			4.906	0.9719	4.986	0.9773	5.047	0.9555	4.66	0.9821	4.788	0.9911	5.323	1.0055	5.281	1.0036	3.441	0.9789
524.67			4.898	0.9703	4.965	0.9731	5.022	0.9508	4.658	0.9817	4.79	0.9915	5.316	1.0042	5.254	0.9985	3.439	0.9784
524.87			4.925	0.9756	4.948	0.9698	5.03	0.9523	4.664	0.9829	4.822	0.9981	5.304	1.0019	5.269	1.0013	3.462	0.9849
525.07			4.933	0.9772	4.975	0.9751	5.04	0.9542	4.697	0.9899	4.861	1.0062	5.349	1.0104	5.329	1.0127	3.466	0.9861
525.26			4.939	0.9784	5.001	0.9802	5.078	0.9614	4.733	0.9975	4.886	1.0114	5.367	1.0138	5.336	1.0141	3.483	0.9909
525.46			4.961	0.9828	5.003	0.9806	5.109	0.9672	4.77	1.0053	4.891	1.0124	5.403	1.0206	5.361	1.0188	3.52	1.0014
525.65			5	0.9905	5.032	0.9863	5.168	0.9784	4.812	1.0141	4.914	1.0172	5.42	1.0238	5.398	1.0258	3.538	1.0065
525.85			4.994	0.9893	5.036	0.9871	5.185	0.9816	4.827	1.0173	4.919	1.0182	5.411	1.0221	5.408	1.0277	3.532	1.0048
526.04			4.974	0.9853	5.01	0.982	5.165	0.9778	4.807	1.0131	4.897	1.0137	5.406	1.0212	5.396	1.0255	3.543	1.008
526.24			5.004	0.9913	5.047	0.9892	5.176	0.9799	4.819	1.0156	4.899	1.0141	5.419	1.0236	5.393	1.0249	3.524	1.0026
526.44			4.974	0.9853	5.024	0.9847	5.145	0.9741	4.793	1.0101	4.871	1.0083	5.371	1.0145	5.355	1.0177	3.513	0.9994
526.63			4.952	0.981	5.011	0.9822	5.131	0.9714	4.796	1.0107	4.831	1	5.344	1.0094	5.34	1.0148	3.503	0.9966
526.83			4.927	0.976	5.005	0.981	5.118	0.969	4.781	1.0076	4.816	0.9969	5.339	1.0085	5.336	1.0141	3.478	0.9895
527.02			4.918	0.9742	5.044	0.9886	5.125	0.9703	4.775	1.0063	4.792	0.9919	5.318	1.0045	5.327	1.0124	3.469	0.9869
527.22			4.911	0.9729	5.016	0.9831	5.127	0.9707	4.748	1.0006	4.8	0.9936	5.305	1.0021	5.299	1.007	3.481	0.9903
527.41			4.915	0.9737	5.019	0.9837	5.132	0.9716	4.748	1.0006	4.798	0.9932	5.299	1.0009	5.32	1.011	3.469	0.9869
527.61			4.933	0.9772	5.035	0.9869	5.141	0.9733	4.746	1.0002	4.823	0.9983	5.307	1.0025	5.311	1.0093	3.469	0.9869
527.8			4.934	0.9774	5.054	0.9906	5.166	0.978	4.758	1.0027	4.819	0.9975	5.323	1.0055	5.324	1.0118	3.485	0.9915
528			4.978	0.9861	5.073	0.9943	5.189	0.9824	4.76	1.0032	4.825	0.9988	5.35	1.0106	5.352	1.0171	3.504	0.9969
528.2			5.031	0.9966	5.089	0.9975	5.241	0.9922	4.783	1.008	4.851	1.0041	5.373	1.0149	5.404	1.027	3.539	1.0068
528.39			5.056	1.0016	5.103	1.0002	5.294	1.0023	4.805	1.0126	4.868	1.0077	5.4	1.02	5.425	1.031	3.565	1.0142
528.59			5.096	1.0095	5.156	1.0106	5.349	1.0127	4.854	1.023	4.88	1.0101	5.449	1.0293	5.467	1.039	3.585	1.0199
528.78			5.13	1.0162	5.182	1.0157	5.408	1.0239	4.895	1.0316	4.904	1.0151	5.483	1.0357	5.486	1.0426	3.606	1.0259
528.98			5.186	1.0273	5.23	1.0251	5.481	1.0377	4.955	1.0443	4.918	1.018	5.516	1.0419	5.534	1.0517	3.658	1.0407
529.17			5.197	1.0295	5.228	1.0247	5.52	1.0451	4.998	1.0533	4.95	1.0246	5.55	1.0484	5.576	1.0597	3.683	1.0478
529.37			5.221	1.0343	5.258	1.0306	5.531	1.0471	5.028	1.0596	4.959	1.0265	5.573	1.0527	5.591	1.0625	3.686	1.0486
529.56			5.244	1.0388	5.28	1.0349	5.577	1.0559	5.067	1.0679	4.988	1.0325	5.593	1.0565	5.59	1.0623	3.707	1.0546
529.76			5.24	1.038	5.284	1.0357	5.598	1.0598	5.086	1.0719	4.98	1.0308	5.597	1.0572	5.621	1.0682	3.73	1.0612
529.95			5.261	1.0422	5.277	1.0343	5.604	1.061	5.082	1.071	4.991	1.0331	5.603	1.0584	5.618	1.0677	3.722	1.0589
530.15			5.246	1.0392	5.291	1.037	5.621	1.0642	5.117	1.0784	4.985	1.0319	5.581	1.0542	5.594	1.0631	3.706	1.0543
530.35			5.213	1.0327	5.293	1.0374	5.592	1.0587	5.107	1.0763	4.996	1.0342	5.589	1.0557	5.567	1.058	3.706	1.0543
530.54			5.192	1.0285	5.267	1.0323	5.559	1.0524	5.095	1.0738	4.966	1.0279	5.55	1.0484	5.536	1.0521	3.673	1.045
530.74			5.19	1.0281	5.234	1.0259	5.525	1.046	5.061	1.0666	4.962	1.0271	5.533	1.0451	5.503	1.0458	3.664	1.0424
530.93			5.168	1.0238	5.209	1.021	5.469	1.0354	5.024	1.0588	4.956	1.0259	5.487	1.0365	5.483	1.042	3.638	1.035
531.13			5.113	1.0129	5.185	1.0163	5.405	1.0233	4.967	1.0468	4.945	1.0236	5.477	1.0346	5.469	1.0393	3.602	1.0248
531.32			5.105	1.0113	5.14	1.0074	5.372	1.017	4.931	1.0392	4.919	1.0182	5.462	1.0317	5.433	1.0325	3.582	1.0191
531.52			5.074	1.0052	5.117	1.0029	5.337	1.0104	4.903	1.0333	4.896	1.0135	5.442	1.028	5.413	1.0287	3.576	1.0174
531.71			5.066	1.0036	5.104	1.0004	5.291	1.0017	4.852	1.0226	4.845	1.0029	5.403	1.0206	5.392	1.0247	3.556	1.0117
531.91			5.035	0.9974	5.089	0.9975	5.25	0.9939	4.829	1.0177	4.844	1.0027	5.386	1.0174	5.37	1.0205	3.533	1.0051
532.1			5.011	0.9927	5.071	0.9939	5.215	0.9873	4.81	1.0137	4.829	0.9996	5.37	1.0144	5.349	1.0165	3.505	0.9972
532.3			4.97	0.9845	5.036	0.9871	5.173	0.9794	4.76	1.0032	4.821	0.9979	5.371	1.0145	5.324	1.0118	3.512	0.9991
532.49			4.954	0.9814	5.027	0.9853	5.177	0.9801	4.758	1.0027	4.784	0.9903	5.348	1.0102	5.315	1.0101	3.486	0.9917
532.69			4.945	0.9796	5.044	0.9886	5.177	0.9801	4.759	1.003	4.795	0.9925	5.343	1.0093	5.341	1.015	3.498	0.9952
532.88			4.927	0.976	5.046	0.989	5.165	0.9778	4.754	1.0019	4.782	0.9899	5.335	1.0077	5.334	1.0137	3.486	0.9917
533.08			4.912	0.9731	5.021	0.9841	5.153	0.9756	4.721	0.9949	4.778	0.989	5.337	1.0081	5.328	1.0125	3.485	0.9915
533.28			4.935	0.9776	5.006	0.9812	5.16	0.9769	4.741	0.9992	4.772	0.9878	5.307	1.0025	5.29	1.0053	3.477	0.9892
533.47			4.912	0.9731	5.026	0.9851	5.148	0.9746	4.728	0.9964	4.768	0.987	5.293	0.9998	5.275	1.0025	3.465	0.9858
533.67			4.911	0.9729	5.025	0.9849	5.165	0.9778	4.726	0.996	4.745	0.9822	5.279	0.9972	5.261	0.9998	3.459	0.9841
533.86			4.889	0.9685	5	0.98	5.165	0.9778	4.715	0.9937	4.772	0.9878	5.311	1.0032	5.261	0.9998	3.46	0.9844
534.06			4.898	0.9703	5.008	0.9816	5.185	0.9816	4.716	0.9939	4.753	0.9839	5.308	1.0026	5.245	0.9968	3.445	0.9801
534.25			4.89	0.9687	5.017	0.9833	5.187	0.982	4.719	0.9945	4.741	0.9814	5.292	0.9996	5.237	0.9952	3.435	0.9772
534.45			4.889	0.9685	5.024	0.9847	5.184	0.9814	4.706	0.9918	4.734	0.9799	5.274	0.9962	5.246	0.997	3.417	0.9721
534.64			4.865	0.9637	5.01	0.982	5.164	0.9777	4.667	0.9836	4.736	0.9803	5.264	0.9943	5.233	0.9945	3.394	0.9656
534.84			4.863	0.9634	4.997	0.9794	5.142	0.9735	4.651	0.9802	4.724	0.9779	5.253	0.9923	5.208	0.9897	3.375	0.9602
535.03			4.849	0.9606	4.955	0.9712	5.123	0.9699	4.621	0.9739	4.735	0.9801	5.235	0.9889	5.198	0.9878	3.385	0.963
535.23			4.853	0.9614	4.95	0.9702	5.109	0.9672	4.611	0.9718	4.725	0.9781	5.212	0.9845	5.191	0.9865	3.375	0.9602
535.42			4.842	0.9592	4.937	0.9677	5.101	0.9657	4.593	0.968	4.712	0.9754	5.191	0.9805	5.18	0.9844	3.364	0.957
535.62			4.859	0.9626	4.946	0.9694	5.098	0.9652	4.576	0.9644	4.71	0.975	5.191	0.9805	5.188	0.9859	3.371	0.959
535.81			4.865	0.9637	4.946	0.9694	5.094	0.9644	4.576	0.9644	4.744	0.982	5.197	0.9817	5.217	0.9914	3.368	0.9582
536.01			4.872	0.9651	4.954	0.971	5.079	0.9616	4.589	0.9671	4.756	0.9845	5.187	0.9798	5.231	0.9941	3.38	0.9616
536.2			4.88	0.9667	4.948	0.9698	5.055	0.957	4.598	0.969	4.74	0.9812	5.166	0.9758	5.205	0.9892	3.357	0.955
536.4			4.863	0.9634	4.949	0.97	5.069	0.9597	4.6	0.9694	4.733	0.9797	5.147	0.9722	5.196	0.9875	3.358	0.9553
536.59			4.864	0.9635	4.951	0.9704	5.087	0.9631	4.631	0.976	4.748	0.9828	5.143	0.9715	5.186	0.9856	3.351	0.9533
536.79			4.909	0.9725	4.957	0.9716	5.09	0.9637	4.642	0.9783	4.741	0.9814	5.147	0.9722	5.19	0.9863	3.37	0.9587
536.98			4.906	0.9719	4.936	0.9675	5.074	0.9606	4.655	0.981	4.736	0.9803	5.142	0.9713	5.182	0.9848	3.377	0.9607
537.18			4.908	0.9723	4.975	0.9751	5.1	0.9655	4.684	0.9871	4.733	0.9797	5.147	0.9722	5.207	0.9895	3.366	0.9576
537.37			4.901	0.9709	4.972	0.9745	5.096	0.9648	4.701	0.9907	4.744	0.982	5.173	0.9771	5.226	0.9932	3.393	0.9653
537.57			4.887	0.9681	4.979	0.9759	5.072	0.9602	4.695	0.9895	4.749	0.983	5.194	0.9811	5.245	0.9968	3.419	0.9727
537.76			4.89	0.9687	4.969	0.9739	5.057	0.9574	4.733	0.9975	4.749	0.983	5.198	0.9819	5.247	0.9971	3.423	0.9738
537.96			4.875	0.9657	4.966	0.9733	5.068	0.9595	4.739	0.9987	4.725	0.9781	5.184	0.9792	5.221	0.9922	3.413	0.971
538.15			4.864	0.9635	4.962	0.9726	5.075	0.9608	4.74	0.9989	4.671	0.9669	5.135	0.97	5.195	0.9873	3.385	0.963
538.35			4.827	0.9562	4.92	0.9643	5.044	0.9549	4.697	0.9899	4.679	0.9685	5.152	0.9732	5.221	0.9922	3.419	0.9727
538.54			4.833	0.9574	4.887	0.9579	5.017	0.9498	4.653	0.9806	4.699	0.9727	5.165	0.9756	5.241	0.996	3.426	0.9747
538.74			4.829	0.9566	4.852	0.951	4.996	0.9459	4.618	0.9732	4.688	0.9704	5.164	0.9754	5.215	0.9911	3.428	0.9752
538.93			4.797	0.9503	4.82	0.9447	4.972	0.9413	4.602	0.9699	4.68	0.9687	5.133	0.9696	5.189	0.9861	3.382	0.9622
539.13			4.775	0.9459	4.8	0.9408	4.98	0.9428	4.577	0.9646	4.664	0.9654	5.123	0.9677	5.16	0.9806	3.378	0.961
539.32			4.77	0.9449	4.79	0.9388	4.952	0.9375	4.555	0.96	4.649	0.9623	5.111	0.9654	5.147	0.9781	3.385	0.963
539.52			4.766	0.9441	4.813	0.9434	4.958	0.9387	4.53	0.9547	4.618	0.9559	5.101	0.9635	5.111	0.9713	3.351	0.9533
539.71			4.783	0.9475	4.793	0.9394	4.966	0.9402	4.516	0.9517	4.613	0.9549	5.117	0.9666	5.131	0.9751	3.336	0.9491
539.91			4.749	0.9408	4.767	0.9343	4.936	0.9345	4.461	0.9401	4.588	0.9497	5.105	0.9643	5.134	0.9757	3.334	0.9485
540.1			4.767	0.9443	4.759	0.9328	4.899	0.9275	4.442	0.9361	4.596	0.9514	5.116	0.9664	5.126	0.9742	3.323	0.9454
540.3			4.774	0.9457	4.771	0.9351	4.883	0.9245	4.43	0.9336	4.619	0.9561	5.16	0.9747	5.129	0.9747	3.34	0.9502
540.49			4.788	0.9485	4.805	0.9418	4.922	0.9318	4.459	0.9397	4.646	0.9617	5.163	0.9753	5.125	0.974	3.353	0.9539
540.69			4.794	0.9497	4.814	0.9436	4.941	0.9354	4.477	0.9435	4.648	0.9621	5.191	0.9805	5.154	0.9795	3.367	0.9579
540.88			4.803	0.9515	4.831	0.9469	4.963	0.9396	4.494	0.9471	4.655	0.9636	5.19	0.9804	5.2	0.9882	3.385	0.963
541.07			4.811	0.9531	4.858	0.9522	4.99	0.9447	4.517	0.9519	4.686	0.97	5.234	0.9887	5.235	0.9949	3.424	0.9741
541.27			4.831	0.957	4.893	0.959	5.015	0.9495	4.549	0.9587	4.73	0.9791	5.283	0.9979	5.294	1.0061	3.439	0.9784
541.46			4.861	0.963	4.927	0.9657	5.05	0.9561	4.577	0.9646	4.756	0.9845	5.303	1.0017	5.31	1.0091	3.452	0.9821
541.66			4.857	0.9622	4.938	0.9679	5.063	0.9585	4.607	0.9709	4.764	0.9861	5.325	1.0059	5.343	1.0154	3.482	0.9906
541.85			4.869	0.9645	4.964	0.973	5.089	0.9635	4.623	0.9743	4.791	0.9917	5.358	1.0121	5.36	1.0186	3.506	0.9974
542.05			4.913	0.9733	5.01	0.982	5.154	0.9758	4.664	0.9829	4.842	1.0023	5.41	1.0219	5.376	1.0217	3.527	1.0034
542.24			4.925	0.9756	5.038	0.9875	5.201	0.9847	4.694	0.9893	4.874	1.0089	5.447	1.0289	5.394	1.0251	3.558	1.0122
542.44			4.929	0.9764	5.042	0.9882	5.22	0.9883	4.725	0.9958	4.906	1.0155	5.478	1.0348	5.444	1.0346	3.571	1.0159
542.63			4.957	0.982	5.043	0.9884	5.225	0.9892	4.723	0.9954	4.913	1.017	5.494	1.0378	5.483	1.042	3.585	1.0199
542.83			4.947	0.98	5.068	0.9933	5.208	0.986	4.734	0.9977	4.94	1.0226	5.501	1.0391	5.487	1.0428	3.61	1.027
543.02			4.971	0.9847	5.09	0.9976	5.194	0.9833	4.757	1.0025	4.955	1.0257	5.529	1.0444	5.49	1.0433	3.608	1.0265
543.22			4.984	0.9873	5.086	0.9969	5.18	0.9807	4.758	1.0027	4.957	1.0261	5.558	1.0499	5.521	1.0492	3.635	1.0341
543.41			4.979	0.9863	5.064	0.9926	5.178	0.9803	4.743	0.9996	4.94	1.0226	5.536	1.0457	5.482	1.0418	3.637	1.0347
543.61			4.964	0.9834	5.034	0.9867	5.155	0.976	4.731	0.997	4.928	1.0201	5.524	1.0434	5.478	1.041	3.593	1.0222
543.8			4.963	0.9832	5.002	0.9804	5.138	0.9727	4.704	0.9914	4.971	1.029	5.533	1.0451	5.466	1.0388	3.591	1.0216
543.99			4.95	0.9806	5.01	0.982	5.125	0.9703	4.724	0.9956	4.971	1.029	5.482	1.0355	5.462	1.038	3.575	1.0171
544.19			4.933	0.9772	4.986	0.9773	5.116	0.9686	4.711	0.9928	4.936	1.0217	5.454	1.0302	5.458	1.0372	3.549	1.0097
544.38			4.949	0.9804	4.969	0.9739	5.117	0.9688	4.72	0.9947	4.924	1.0193	5.445	1.0285	5.491	1.0435	3.577	1.0176
544.58			4.949	0.9804	4.965	0.9731	5.106	0.9667	4.692	0.9888	4.888	1.0118	5.383	1.0168	5.43	1.0319	3.54	1.0071
544.77			4.932	0.977	4.955	0.9712	5.091	0.9638	4.684	0.9871	4.88	1.0101	5.372	1.0147	5.426	1.0312	3.535	1.0057
544.97			4.958	0.9822	4.933	0.9669	5.092	0.964	4.672	0.9846	4.868	1.0077	5.362	1.0128	5.421	1.0302	3.527	1.0034
545.16			4.947	0.98	4.936	0.9675	5.087	0.9631	4.633	0.9764	4.847	1.0033	5.351	1.0108	5.412	1.0285	3.51	0.9986
545.36			4.918	0.9742	4.931	0.9665	5.068	0.9595	4.613	0.9722	4.827	0.9992	5.303	1.0017	5.364	1.0194	3.489	0.9926
545.55			4.907	0.9721	4.924	0.9651	5.043	0.9548	4.601	0.9697	4.807	0.995	5.289	0.9991	5.364	1.0194	3.481	0.9903
545.75			4.901	0.9709	4.921	0.9645	5.04	0.9542	4.601	0.9697	4.818	0.9973	5.301	1.0013	5.359	1.0184	3.523	1.0023
545.94			4.925	0.9756	4.933	0.9669	5.037	0.9536	4.619	0.9734	4.788	0.9911	5.292	0.9996	5.361	1.0188	3.523	1.0023
546.13			4.917	0.974	4.902	0.9608	5.003	0.9472	4.593	0.968	4.781	0.9897	5.305	1.0021	5.323	1.0116	3.536	1.006
546.33			4.937	0.978	4.931	0.9665	5.007	0.9479	4.606	0.9707	4.758	0.9849	5.282	0.9977	5.303	1.0078	3.546	1.0088
546.52			4.91	0.9727	4.907	0.9618	4.953	0.9377	4.589	0.9671	4.755	0.9843	5.269	0.9953	5.288	1.0049	3.498	0.9952
546.72			4.916	0.9739	4.913	0.963	4.962	0.9394	4.597	0.9688	4.739	0.981	5.27	0.9955	5.287	1.0048	3.511	0.9989
546.91			4.892	0.9691	4.908	0.962	4.947	0.9366	4.576	0.9644	4.735	0.9801	5.259	0.9934	5.279	1.0032	3.472	0.9878
547.11			4.881	0.9669	4.905	0.9614	4.948	0.9368	4.561	0.9612	4.72	0.977	5.253	0.9923	5.248	0.9973	3.466	0.9861
547.3			4.877	0.9661	4.881	0.9567	4.955	0.9381	4.555	0.96	4.699	0.9727	5.248	0.9913	5.226	0.9932	3.472	0.9878
547.49			4.893	0.9693	4.884	0.9573	4.951	0.9373	4.554	0.9597	4.705	0.9739	5.239	0.9896	5.232	0.9943	3.46	0.9844
547.69			4.886	0.9679	4.907	0.9618	4.945	0.9362	4.552	0.9593	4.719	0.9768	5.233	0.9885	5.22	0.992	3.447	0.9807
547.88			4.905	0.9717	4.929	0.9661	4.953	0.9377	4.572	0.9635	4.695	0.9718	5.205	0.9832	5.207	0.9895	3.432	0.9764
548.08			4.908	0.9723	4.933	0.9669	4.957	0.9385	4.573	0.9638	4.669	0.9665	5.18	0.9785	5.174	0.9833	3.418	0.9724
548.27			4.887	0.9681	4.945	0.9692	4.991	0.9449	4.557	0.9604	4.672	0.9671	5.18	0.9785	5.162	0.981	3.386	0.9633
548.47			4.844	0.9596	4.904	0.9612	4.944	0.936	4.534	0.9555	4.669	0.9665	5.156	0.9739	5.147	0.9781	3.341	0.9505
548.66			4.826	0.956	4.941	0.9684	4.941	0.9354	4.493	0.9469	4.657	0.964	5.149	0.9726	5.125	0.974	3.357	0.955
548.86			4.799	0.9507	4.938	0.9679	4.927	0.9328	4.494	0.9471	4.627	0.9578	5.117	0.9666	5.115	0.9721	3.347	0.9522
549.05			4.789	0.9487	4.902	0.9608	4.904	0.9284	4.486	0.9454	4.602	0.9526	5.124	0.9679	5.085	0.9664	3.332	0.9479
549.24			4.793	0.9495	4.923	0.9649	4.921	0.9317	4.509	0.9503	4.596	0.9514	5.107	0.9647	5.083	0.966	3.307	0.9408
549.44			4.772	0.9453	4.913	0.963	4.903	0.9282	4.516	0.9517	4.591	0.9503	5.074	0.9584	5.054	0.9605	3.265	0.9289
549.63			4.754	0.9418	4.87	0.9545	4.906	0.9288	4.495	0.9473	4.58	0.948	5.056	0.955	5.032	0.9563	3.226	0.9178
549.83			4.769	0.9447	4.854	0.9514	4.903	0.9282	4.495	0.9473	4.551	0.942	5.048	0.9535	5.035	0.9569	3.232	0.9195
550.02			4.739	0.9388	4.824	0.9455	4.882	0.9243	4.458	0.9395	4.507	0.9329	5.055	0.9549	5.008	0.9517	3.201	0.9107
550.21			4.709	0.9328	4.782	0.9373	4.832	0.9148	4.428	0.9332	4.488	0.929	5.036	0.9513	5.006	0.9513	3.173	0.9027
550.41			4.724	0.9358	4.806	0.942	4.819	0.9123	4.467	0.9414	4.459	0.923	4.993	0.9431	5.011	0.9523	3.168	0.9013
550.6			4.727	0.9364	4.795	0.9398	4.784	0.9057	4.443	0.9364	4.489	0.9292	5.015	0.9473	5.015	0.9531	3.173	0.9027
550.8			4.704	0.9319	4.733	0.9277	4.762	0.9016	4.447	0.9372	4.479	0.9271	4.989	0.9424	4.996	0.9494	3.159	0.8987
550.99			4.722	0.9354	4.701	0.9214	4.725	0.8945	4.413	0.93	4.501	0.9317	4.999	0.9443	4.983	0.947	3.164	0.9001
551.19			4.747	0.9404	4.748	0.9306	4.759	0.901	4.451	0.938	4.516	0.9348	5.009	0.9462	4.971	0.9447	3.198	0.9098
551.38			4.709	0.9328	4.692	0.9196	4.708	0.8913	4.407	0.9288	4.47	0.9253	4.975	0.9397	4.957	0.942	3.191	0.9078
551.57			4.737	0.9384	4.7	0.9212	4.718	0.8932	4.419	0.9313	4.483	0.928	4.967	0.9382	4.972	0.9449	3.212	0.9138
551.77			4.731	0.9372	4.708	0.9228	4.716	0.8928	4.411	0.9296	4.461	0.9234	4.95	0.935	4.962	0.943	3.223	0.9169
551.96			4.735	0.938	4.717	0.9245	4.711	0.8919	4.412	0.9298	4.448	0.9207	4.939	0.9329	4.916	0.9342	3.199	0.9101
552.16			4.732	0.9374	4.71	0.9232	4.714	0.8925	4.39	0.9252	4.488	0.929	4.936	0.9324	4.924	0.9358	3.215	0.9147
552.35			4.734	0.9378	4.733	0.9277	4.754	0.9	4.379	0.9229	4.541	0.94	4.956	0.9362	4.967	0.9439	3.242	0.9223
552.54			4.748	0.9406	4.734	0.9279	4.774	0.9038	4.335	0.9136	4.554	0.9427	4.988	0.9422	5.001	0.9504	3.237	0.9209
552.74			4.761	0.9431	4.771	0.9351	4.809	0.9105	4.38	0.9231	4.531	0.9379	4.986	0.9418	5.005	0.9512	3.258	0.9269
552.93			4.769	0.9447	4.775	0.9359	4.831	0.9146	4.42	0.9315	4.521	0.9358	5.014	0.9471	4.995	0.9493	3.252	0.9252
553.13			4.785	0.9479	4.81	0.9428	4.869	0.9218	4.467	0.9414	4.543	0.9404	5.018	0.9479	5.025	0.955	3.234	0.9201
553.32			4.778	0.9465	4.806	0.942	4.869	0.9218	4.482	0.9446	4.55	0.9418	5.035	0.9511	5.058	0.9612	3.254	0.9257
553.51			4.792	0.9493	4.846	0.9498	4.89	0.9258	4.516	0.9517	4.567	0.9454	5.059	0.9556	5.049	0.9595	3.238	0.9212
553.71			4.785	0.9479	4.818	0.9443	4.882	0.9243	4.485	0.9452	4.558	0.9435	5.075	0.9586	5.07	0.9635	3.248	0.924
553.9			4.8	0.9509	4.823	0.9453	4.89	0.9258	4.503	0.949	4.557	0.9433	5.08	0.9596	5.092	0.9677	3.282	0.9337
554.1			4.779	0.9467	4.806	0.942	4.891	0.926	4.51	0.9505	4.61	0.9543	5.097	0.9628	5.148	0.9783	3.296	0.9377
554.29			4.787	0.9483	4.814	0.9436	4.896	0.9269	4.554	0.9597	4.578	0.9476	5.074	0.9584	5.153	0.9793	3.287	0.9351
554.48			4.784	0.9477	4.843	0.9492	4.884	0.9246	4.61	0.9715	4.588	0.9497	5.022	0.9486	5.131	0.9751	3.27	0.9303
554.68			4.727	0.9364	4.8	0.9408	4.861	0.9203	4.612	0.972	4.627	0.9578	5.038	0.9516	5.125	0.974	3.31	0.9417
554.87			4.712	0.9334	4.753	0.9316	4.82	0.9125	4.577	0.9646	4.654	0.9634	5.062	0.9562	5.146	0.978	3.338	0.9496
555.07			4.725	0.936	4.796	0.94	4.877	0.9233	4.585	0.9663	4.674	0.9675	5.068	0.9573	5.19	0.9863	3.339	0.9499
555.26			4.719	0.9348	4.797	0.9402	4.888	0.9254	4.562	0.9614	4.643	0.9611	5.086	0.9607	5.142	0.9772	3.358	0.9553
555.45			4.741	0.9392	4.819	0.9445	4.913	0.9301	4.566	0.9623	4.643	0.9611	5.061	0.956	5.127	0.9743	3.354	0.9542
555.65			4.718	0.9346	4.78	0.9369	4.895	0.9267	4.562	0.9614	4.68	0.9687	5.079	0.9594	5.167	0.9819	3.386	0.9633
555.84			4.664	0.9239	4.82	0.9447	4.912	0.93	4.599	0.9692	4.687	0.9702	5.068	0.9573	5.188	0.9859	3.393	0.9653
556.03			4.677	0.9265	4.835	0.9477	4.915	0.9305	4.638	0.9774	4.707	0.9743	5.059	0.9556	5.197	0.9876	3.368	0.9582
556.23			4.684	0.9279	4.815	0.9437	4.937	0.9347	4.635	0.9768	4.677	0.9681	5.045	0.953	5.192	0.9867	3.352	0.9536
556.42			4.684	0.9279	4.814	0.9436	4.924	0.9322	4.606	0.9707	4.694	0.9716	5.082	0.96	5.238	0.9954	3.382	0.9622
556.62			4.666	0.9243	4.791	0.939	4.967	0.9404	4.588	0.9669	4.662	0.965	5.142	0.9713	5.224	0.9928	3.418	0.9724
556.81			4.741	0.9392	4.806	0.942	4.963	0.9396	4.603	0.9701	4.595	0.9511	5.108	0.9649	5.194	0.9871	3.389	0.9642
557			4.763	0.9435	4.856	0.9518	5.019	0.9502	4.639	0.9777	4.613	0.9549	5.116	0.9664	5.191	0.9865	3.389	0.9642
557.2			4.802	0.9513	4.844	0.9494	4.999	0.9464	4.634	0.9766	4.587	0.9495	5.084	0.9603	5.143	0.9774	3.356	0.9548
557.39			4.759	0.9427	4.789	0.9387	4.969	0.9407	4.656	0.9812	4.609	0.954	5.081	0.9598	5.177	0.9838	3.393	0.9653
557.59			4.713	0.9336	4.731	0.9273	4.961	0.9392	4.641	0.9781	4.584	0.9489	5.081	0.9598	5.192	0.9867	3.374	0.9599
557.78			4.734	0.9378	4.752	0.9314	4.974	0.9417	4.625	0.9747	4.569	0.9458	5.037	0.9515	5.164	0.9814	3.365	0.9573
557.97			4.787	0.9483	4.746	0.9302	4.935	0.9343	4.61	0.9715	4.582	0.9485	4.983	0.9413	5.095	0.9683	3.31	0.9417
558.17			4.749	0.9408	4.767	0.9343	4.937	0.9347	4.58	0.9652	4.559	0.9437	4.997	0.9439	5.07	0.9635	3.331	0.9477
558.36			4.783	0.9475	4.795	0.9398	4.935	0.9343	4.555	0.96	4.553	0.9425	5.005	0.9454	5.042	0.9582	3.354	0.9542
558.55			4.798	0.9505	4.787	0.9383	4.933	0.9339	4.533	0.9553	4.577	0.9474	4.976	0.9399	4.98	0.9464	3.32	0.9445
558.75			4.799	0.9507	4.837	0.9481	4.927	0.9328	4.531	0.9549	4.576	0.9472	4.974	0.9396	4.996	0.9494	3.278	0.9326
558.94			4.771	0.9451	4.829	0.9465	4.927	0.9328	4.527	0.9541	4.549	0.9416	4.97	0.9388	5.008	0.9517	3.268	0.9297
559.13			4.784	0.9477	4.815	0.9437	4.959	0.9388	4.517	0.9519	4.53	0.9377	4.945	0.9341	4.992	0.9487	3.261	0.9277
559.33			4.773	0.9455	4.84	0.9486	4.97	0.9409	4.521	0.9528	4.504	0.9323	4.912	0.9278	4.965	0.9436	3.289	0.9357
559.52			4.812	0.9532	4.926	0.9655	4.986	0.944	4.491	0.9465	4.54	0.9398	4.917	0.9288	4.955	0.9417	3.256	0.9263
559.72			4.872	0.9651	4.985	0.9771	4.986	0.944	4.495	0.9473	4.543	0.9404	4.889	0.9235	4.968	0.9441	3.29	0.936
559.91			4.857	0.9622	4.964	0.973	4.99	0.9447	4.519	0.9524	4.536	0.9389	4.882	0.9222	4.97	0.9445	3.294	0.9371
560.1			4.825	0.9558	4.931	0.9665	5.015	0.9495	4.512	0.9509	4.523	0.9362	4.951	0.9352	4.96	0.9426	3.359	0.9556
560.3			4.826	0.956	4.917	0.9637	4.992	0.9451	4.483	0.9448	4.542	0.9402	4.98	0.9407	4.97	0.9445	3.331	0.9477
560.49			4.787	0.9483	4.906	0.9616	4.951	0.9373	4.514	0.9513	4.558	0.9435	5.004	0.9452	4.978	0.946	3.313	0.9425
560.68			4.779	0.9467	4.926	0.9655	4.977	0.9423	4.568	0.9627	4.543	0.9404	5.033	0.9507	4.993	0.9489	3.336	0.9491
560.88			4.798	0.9505	4.884	0.9573	4.974	0.9417	4.588	0.9669	4.541	0.94	5.009	0.9462	4.97	0.9445	3.374	0.9599
561.07			4.788	0.9485	4.932	0.9667	4.971	0.9411	4.602	0.9699	4.551	0.942	4.995	0.9435	4.953	0.9413	3.395	0.9659
561.26			4.792	0.9493	4.937	0.9677	4.957	0.9385	4.64	0.9779	4.581	0.9483	4.996	0.9437	4.945	0.9398	3.402	0.9679
561.46			4.77	0.9449	4.948	0.9698	4.972	0.9413	4.67	0.9842	4.59	0.9501	5.002	0.9448	5.001	0.9504	3.434	0.977
561.65			4.715	0.934	4.888	0.9581	4.982	0.9432	4.693	0.989	4.552	0.9422	4.978	0.9403	5.045	0.9588	3.424	0.9741
561.84			4.672	0.9255	4.854	0.9514	4.976	0.9421	4.685	0.9874	4.608	0.9538	4.98	0.9407	5.016	0.9532	3.388	0.9639
562.04			4.704	0.9319	4.885	0.9575	4.982	0.9432	4.702	0.9909	4.609	0.954	5.015	0.9473	5.021	0.9542	3.421	0.9733
562.23			4.745	0.94	4.927	0.9657	4.979	0.9426	4.726	0.996	4.615	0.9553	5.058	0.9554	5.069	0.9633	3.406	0.969
562.42			4.777	0.9463	4.961	0.9724	5.021	0.9506	4.758	1.0027	4.617	0.9557	5.027	0.9496	5.041	0.958	3.416	0.9718
562.62			4.796	0.9501	5.002	0.9804	5.069	0.9597	4.74	0.9989	4.634	0.9592	5.02	0.9482	5.049	0.9595	3.458	0.9838
562.81			4.764	0.9437	4.992	0.9784	5.037	0.9536	4.705	0.9916	4.645	0.9615	5.011	0.9465	5.043	0.9584	3.445	0.9801
563			4.764	0.9437	4.97	0.9741	5.056	0.9572	4.712	0.993	4.644	0.9613	5.021	0.9484	5.058	0.9612	3.42	0.973
563.2			4.774	0.9457	4.916	0.9635	5.077	0.9612	4.716	0.9939	4.696	0.9721	5.043	0.9526	5.09	0.9673	3.422	0.9735
563.39			4.771	0.9451	4.91	0.9624	5.07	0.9599	4.705	0.9916	4.667	0.9661	5.035	0.9511	5.085	0.9664	3.421	0.9733
563.58			4.814	0.9536	4.909	0.9622	5.09	0.9637	4.715	0.9937	4.663	0.9652	5.016	0.9475	5.047	0.9591	3.377	0.9607
563.78			4.87	0.9647	4.944	0.969	5.111	0.9676	4.75	1.0011	4.661	0.9648	5.055	0.9549	5.044	0.9586	3.362	0.9565
563.97			4.926	0.9758	4.968	0.9737	5.108	0.9671	4.799	1.0114	4.581	0.9483	5.088	0.9611	5.018	0.9536	3.408	0.9696
564.16			4.899	0.9705	4.961	0.9724	5.123	0.9699	4.779	1.0072	4.653	0.9632	5.121	0.9673	5.044	0.9586	3.428	0.9752
564.36			4.92	0.9746	4.988	0.9777	5.156	0.9761	4.794	1.0103	4.646	0.9617	5.067	0.9571	5.038	0.9574	3.401	0.9676
564.55			4.92	0.9746	4.951	0.9704	5.131	0.9714	4.775	1.0063	4.637	0.9598	5.083	0.9601	5.063	0.9622	3.41	0.9701
564.74			4.912	0.9731	4.964	0.973	5.159	0.9767	4.791	1.0097	4.615	0.9553	5.044	0.9528	5.072	0.9639	3.365	0.9573
564.94			4.921	0.9748	4.958	0.9718	5.172	0.9792	4.807	1.0131	4.591	0.9503	5.039	0.9518	5.087	0.9667	3.37	0.9587
565.13			4.941	0.9788	5.017	0.9833	5.145	0.9741	4.791	1.0097	4.59	0.9501	5.058	0.9554	5.099	0.969	3.388	0.9639
565.32			4.986	0.9877	5.051	0.99	5.182	0.9811	4.828	1.0175	4.565	0.9449	5.053	0.9545	5.109	0.9709	3.402	0.9679
565.52			4.995	0.9895	5.077	0.9951	5.205	0.9854	4.826	1.0171	4.592	0.9505	5.068	0.9573	5.127	0.9743	3.408	0.9696
565.71			4.998	0.9901	5.091	0.9978	5.2	0.9845	4.814	1.0145	4.658	0.9642	5.115	0.9662	5.17	0.9825	3.421	0.9733
565.9			4.984	0.9873	5.065	0.9927	5.189	0.9824	4.762	1.0036	4.673	0.9673	5.087	0.9609	5.161	0.9808	3.464	0.9855
566.1			4.932	0.977	5.05	0.9898	5.215	0.9873	4.771	1.0055	4.733	0.9797	5.111	0.9654	5.215	0.9911	3.444	0.9798
566.29			4.987	0.9879	5.134	1.0063	5.268	0.9973	4.822	1.0162	4.716	0.9762	5.129	0.9688	5.209	0.9899	3.414	0.9713
566.48			5.007	0.9919	5.13	1.0055	5.262	0.9962	4.815	1.0148	4.799	0.9934	5.175	0.9775	5.266	1.0008	3.488	0.9923
566.68			4.987	0.9879	5.137	1.0069	5.262	0.9962	4.806	1.0129	4.844	1.0027	5.183	0.979	5.308	1.0087	3.516	1.0003
566.87			5.009	0.9923	5.124	1.0043	5.265	0.9968	4.829	1.0177	4.87	1.0081	5.242	0.9902	5.36	1.0186	3.588	1.0208
567.06			5.016	0.9937	5.128	1.0051	5.276	0.9989	4.835	1.019	4.915	1.0174	5.286	0.9985	5.394	1.0251	3.643	1.0364
567.26			5.003	0.9911	5.099	0.9994	5.256	0.9951	4.875	1.0274	4.937	1.0219	5.291	0.9994	5.369	1.0203	3.633	1.0336
567.45			5.01	0.9925	5.095	0.9986	5.272	0.9981	4.87	1.0263	4.977	1.0302	5.301	1.0013	5.357	1.0181	3.624	1.031
567.64			4.987	0.9879	5.074	0.9945	5.247	0.9934	4.852	1.0226	4.953	1.0253	5.272	0.9958	5.355	1.0177	3.582	1.0191
567.84			4.944	0.9794	5.045	0.9888	5.193	0.9832	4.851	1.0223	4.941	1.0228	5.286	0.9985	5.343	1.0154	3.605	1.0256
568.03			4.961	0.9828	5.093	0.9982	5.172	0.9792	4.909	1.0346	4.942	1.023	5.347	1.01	5.334	1.0137	3.583	1.0193
568.22			4.981	0.9867	5.118	1.0031	5.166	0.978	4.864	1.0251	4.932	1.0209	5.332	1.0072	5.328	1.0125	3.574	1.0168
568.41			4.97	0.9845	5.097	0.999	5.133	0.9718	4.822	1.0162	4.885	1.0112	5.298	1.0008	5.335	1.0139	3.551	1.0102
568.61			4.942	0.979	5.062	0.9922	5.135	0.9722	4.799	1.0114	4.842	1.0023	5.312	1.0034	5.306	1.0084	3.517	1.0006
568.8			4.987	0.9879	5.066	0.9929	5.188	0.9822	4.871	1.0266	4.821	0.9979	5.362	1.0128	5.31	1.0091	3.497	0.9949
568.99			4.95	0.9806	5.02	0.9839	5.136	0.9724	4.811	1.0139	4.817	0.9971	5.375	1.0153	5.29	1.0053	3.485	0.9915
569.19			4.934	0.9774	5.008	0.9816	5.131	0.9714	4.801	1.0118	4.798	0.9932	5.347	1.01	5.244	0.9966	3.447	0.9807
569.38			4.933	0.9772	5.012	0.9824	5.195	0.9835	4.78	1.0074	4.785	0.9905	5.322	1.0053	5.257	0.999	3.465	0.9858
569.57			4.896	0.9699	5.014	0.9828	5.166	0.978	4.747	1.0004	4.77	0.9874	5.332	1.0072	5.293	1.0059	3.446	0.9804
569.77			4.891	0.9689	5.041	0.988	5.169	0.9786	4.751	1.0013	4.765	0.9863	5.375	1.0153	5.295	1.0063	3.478	0.9895
569.96			4.921	0.9748	5.046	0.989	5.219	0.9881	4.733	0.9975	4.774	0.9882	5.393	1.0187	5.307	1.0086	3.503	0.9966
570.15			4.913	0.9733	5.03	0.9859	5.24	0.992	4.677	0.9857	4.811	0.9959	5.363	1.013	5.311	1.0093	3.526	1.0031
570.34			4.926	0.9758	5.044	0.9886	5.248	0.9936	4.72	0.9947	4.796	0.9928	5.36	1.0125	5.283	1.004	3.552	1.0105
570.54			4.889	0.9685	5.02	0.9839	5.237	0.9915	4.682	0.9867	4.812	0.9961	5.354	1.0113	5.243	0.9964	3.589	1.0211
570.73			4.906	0.9719	5.069	0.9935	5.225	0.9892	4.727	0.9962	4.806	0.9948	5.318	1.0045	5.254	0.9985	3.608	1.0265
570.92			4.902	0.9711	5.066	0.9929	5.19	0.9826	4.688	0.988	4.801	0.9938	5.274	0.9962	5.214	0.9909	3.606	1.0259
571.12			4.888	0.9683	5.126	1.0047	5.204	0.9852	4.689	0.9882	4.769	0.9872	5.238	0.9894	5.218	0.9916	3.58	1.0185
571.31			4.915	0.9737	5.136	1.0067	5.191	0.9828	4.711	0.9928	4.791	0.9917	5.254	0.9924	5.229	0.9937	3.587	1.0205
571.5			4.928	0.9762	5.132	1.0059	5.157	0.9763	4.757	1.0025	4.804	0.9944	5.294	1	5.264	1.0004	3.608	1.0265
571.69			4.958	0.9822	5.157	1.0108	5.185	0.9816	4.788	1.0091	4.821	0.9979	5.302	1.0015	5.258	0.9992	3.616	1.0287
571.89			4.976	0.9857	5.11	1.0016	5.192	0.983	4.792	1.0099	4.843	1.0025	5.299	1.0009	5.259	0.9994	3.639	1.0353
572.08			4.979	0.9863	5.108	1.0012	5.196	0.9837	4.783	1.008	4.849	1.0037	5.305	1.0021	5.272	1.0019	3.635	1.0341
572.27			5.015	0.9935	5.101	0.9998	5.212	0.9867	4.829	1.0177	4.817	0.9971	5.285	0.9983	5.282	1.0038	3.608	1.0265
572.47			4.998	0.9901	5.054	0.9906	5.218	0.9879	4.808	1.0133	4.803	0.9942	5.28	0.9974	5.312	1.0095	3.612	1.0276
572.66			5.026	0.9956	5.058	0.9914	5.203	0.985	4.845	1.0211	4.825	0.9988	5.297	1.0006	5.374	1.0213	3.599	1.0239
572.85			5.014	0.9933	5.009	0.9818	5.252	0.9943	4.821	1.016	4.821	0.9979	5.334	1.0076	5.377	1.0219	3.597	1.0233
573.04			4.977	0.9859	5.015	0.9829	5.257	0.9953	4.836	1.0192	4.83	0.9998	5.333	1.0074	5.422	1.0304	3.599	1.0239
573.24			4.999	0.9903	5.009	0.9818	5.258	0.9955	4.882	1.0289	4.872	1.0085	5.355	1.0115	5.431	1.0321	3.615	1.0284
573.43			4.982	0.9869	4.987	0.9775	5.254	0.9947	4.845	1.0211	4.834	1.0006	5.374	1.0151	5.454	1.0365	3.604	1.0253
573.62			4.989	0.9883	4.986	0.9773	5.231	0.9903	4.763	1.0038	4.782	0.9899	5.351	1.0108	5.418	1.0296	3.561	1.0131
573.81			4.968	0.9842	4.964	0.973	5.207	0.9858	4.738	0.9985	4.788	0.9911	5.351	1.0108	5.411	1.0283	3.588	1.0208
574.01			4.989	0.9883	5.018	0.9835	5.22	0.9883	4.727	0.9962	4.8	0.9936	5.359	1.0123	5.417	1.0295	3.57	1.0156
574.2			4.986	0.9877	5.018	0.9835	5.236	0.9913	4.71	0.9926	4.809	0.9954	5.374	1.0151	5.45	1.0357	3.567	1.0148
574.39			4.975	0.9855	5.021	0.9841	5.231	0.9903	4.709	0.9924	4.815	0.9967	5.428	1.0253	5.456	1.0369	3.611	1.0273
574.59			4.982	0.9869	5.06	0.9918	5.185	0.9816	4.693	0.989	4.814	0.9965	5.426	1.0249	5.473	1.0401	3.606	1.0259
574.78			4.989	0.9883	5.042	0.9882	5.192	0.983	4.695	0.9895	4.807	0.995	5.455	1.0304	5.469	1.0393	3.625	1.0313
574.97			4.968	0.9842	5.046	0.989	5.148	0.9746	4.719	0.9945	4.822	0.9981	5.412	1.0223	5.491	1.0435	3.644	1.0367
575.16			5.02	0.9945	5.091	0.9978	5.178	0.9803	4.745	1	4.818	0.9973	5.44	1.0276	5.478	1.041	3.649	1.0381
575.36			5.035	0.9974	5.081	0.9959	5.173	0.9794	4.737	0.9983	4.825	0.9988	5.497	1.0383	5.494	1.0441	3.704	1.0538
575.55			5.021	0.9947	5.122	1.0039	5.184	0.9814	4.775	1.0063	4.88	1.0101	5.481	1.0353	5.519	1.0488	3.713	1.0563
575.74			5.021	0.9947	5.138	1.0071	5.214	0.9871	4.801	1.0118	4.968	1.0284	5.485	1.0361	5.53	1.0509	3.749	1.0666
575.93			4.993	0.9891	5.135	1.0065	5.161	0.9771	4.786	1.0086	4.973	1.0294	5.533	1.0451	5.543	1.0534	3.761	1.07
576.13			4.979	0.9863	5.123	1.0041	5.178	0.9803	4.809	1.0135	4.971	1.029	5.564	1.051	5.559	1.0564	3.759	1.0694
576.32			4.973	0.9851	5.107	1.001	5.114	0.9682	4.827	1.0173	4.923	1.019	5.538	1.0461	5.509	1.0469	3.758	1.0691
576.51			4.941	0.9788	5.098	0.9992	5.086	0.9629	4.81	1.0137	4.905	1.0153	5.512	1.0412	5.485	1.0424	3.757	1.0688
576.7			4.947	0.98	5.063	0.9924	5.127	0.9707	4.814	1.0145	4.949	1.0244	5.541	1.0467	5.482	1.0418	3.772	1.0731
576.9			4.91	0.9727	5.062	0.9922	5.115	0.9684	4.806	1.0129	4.938	1.0221	5.497	1.0383	5.468	1.0391	3.766	1.0714
577.09			4.951	0.9808	5.072	0.9941	5.082	0.9621	4.773	1.0059	4.926	1.0197	5.554	1.0491	5.439	1.0336	3.762	1.0703
577.28			4.903	0.9713	5.027	0.9853	5.07	0.9599	4.752	1.0015	4.94	1.0226	5.529	1.0444	5.456	1.0369	3.738	1.0634
577.47			4.895	0.9697	5.012	0.9824	5.039	0.954	4.736	0.9981	4.908	1.0159	5.452	1.0298	5.393	1.0249	3.667	1.0432
577.67			4.92	0.9746	5.001	0.9802	5.021	0.9506	4.689	0.9882	4.902	1.0147	5.44	1.0276	5.388	1.0239	3.669	1.0438
577.86			4.922	0.975	5.008	0.9816	4.992	0.9451	4.672	0.9846	4.865	1.007	5.421	1.024	5.406	1.0274	3.659	1.041
578.05			4.963	0.9832	5.046	0.989	5.006	0.9477	4.703	0.9911	4.843	1.0025	5.378	1.0159	5.406	1.0274	3.646	1.0373
578.24			4.954	0.9814	5.047	0.9892	4.954	0.9379	4.714	0.9935	4.84	1.0019	5.331	1.007	5.391	1.0245	3.652	1.039
578.44			4.962	0.983	5.113	1.0022	4.979	0.9426	4.741	0.9992	4.882	1.0106	5.299	1.0009	5.389	1.0241	3.661	1.0415
578.63			5.007	0.9919	5.132	1.0059	4.99	0.9447	4.753	1.0017	4.883	1.0108	5.288	0.9989	5.453	1.0363	3.633	1.0336
578.82			5.061	1.0026	5.19	1.0172	5.009	0.9483	4.761	1.0034	4.858	1.0056	5.276	0.9966	5.413	1.0287	3.623	1.0307
579.01			5.059	1.0022	5.197	1.0186	4.991	0.9449	4.749	1.0008	4.868	1.0077	5.296	1.0004	5.388	1.0239	3.654	1.0395
579.21			5.004	0.9913	5.174	1.0141	5	0.9466	4.749	1.0008	4.873	1.0087	5.208	0.9838	5.362	1.019	3.609	1.0267
579.4			4.995	0.9895	5.174	1.0141	4.96	0.939	4.717	0.9941	4.864	1.0068	5.226	0.9872	5.299	1.007	3.636	1.0344
579.59			5.024	0.9952	5.219	1.0229	5.041	0.9544	4.721	0.9949	4.857	1.0054	5.243	0.9904	5.266	1.0008	3.623	1.0307
579.78			5.044	0.9992	5.24	1.027	5.097	0.965	4.772	1.0057	4.807	0.995	5.213	0.9847	5.19	0.9863	3.578	1.0179
579.97			4.985	0.9875	5.217	1.0225	5.091	0.9638	4.786	1.0086	4.785	0.9905	5.227	0.9873	5.155	0.9797	3.532	1.0048
580.17			4.993	0.9891	5.192	1.0176	5.129	0.971	4.776	1.0065	4.742	0.9816	5.159	0.9745	5.086	0.9666	3.474	0.9883
580.36			4.962	0.983	5.149	1.0092	5.134	0.972	4.701	0.9907	4.704	0.9737	5.141	0.9711	5.075	0.9645	3.444	0.9798
580.55			4.94	0.9786	5.078	0.9953	5.1	0.9655	4.666	0.9834	4.693	0.9714	5.18	0.9785	5.074	0.9643	3.443	0.9795
580.74			4.893	0.9693	5.055	0.9908	5.111	0.9676	4.67	0.9842	4.692	0.9712	5.171	0.9768	4.994	0.9491	3.426	0.9747
580.94			4.879	0.9665	5.079	0.9955	5.123	0.9699	4.69	0.9884	4.703	0.9735	5.116	0.9664	4.984	0.9472	3.407	0.9693
581.13			4.908	0.9723	5.115	1.0025	5.136	0.9724	4.718	0.9943	4.755	0.9843	5.101	0.9635	5.019	0.9538	3.387	0.9636
581.32			4.928	0.9762	5.162	1.0118	5.194	0.9833	4.729	0.9966	4.764	0.9861	5.155	0.9737	5.011	0.9523	3.418	0.9724
581.51			4.935	0.9776	5.172	1.0137	5.217	0.9877	4.75	1.0011	4.757	0.9847	5.125	0.9681	5.006	0.9513	3.418	0.9724
581.71			4.871	0.9649	5.109	1.0014	5.144	0.9739	4.738	0.9985	4.786	0.9907	5.11	0.9652	5.046	0.959	3.413	0.971
581.9			4.88	0.9667	5.053	0.9904	5.113	0.968	4.732	0.9973	4.81	0.9957	5.13	0.969	5.107	0.9705	3.431	0.9761
582.09			4.902	0.9711	5.06	0.9918	5.134	0.972	4.738	0.9985	4.795	0.9925	5.12	0.9671	5.106	0.9704	3.477	0.9892
582.28			4.845	0.9598	4.984	0.9769	5.077	0.9612	4.707	0.992	4.87	1.0081	5.213	0.9847	5.188	0.9859	3.545	1.0085
582.47			4.853	0.9614	4.994	0.9788	5.082	0.9621	4.724	0.9956	4.897	1.0137	5.223	0.9866	5.191	0.9865	3.528	1.0037
582.67			4.879	0.9665	5.013	0.9826	5.127	0.9707	4.736	0.9981	4.87	1.0081	5.2	0.9822	5.187	0.9857	3.512	0.9991
582.86			4.874	0.9655	4.985	0.9771	5.097	0.965	4.719	0.9945	4.865	1.007	5.231	0.9881	5.211	0.9903	3.572	1.0162
583.05			4.841	0.959	4.936	0.9675	5.028	0.9519	4.673	0.9848	4.867	1.0075	5.26	0.9936	5.232	0.9943	3.589	1.0211
583.24			4.904	0.9715	4.911	0.9626	5.07	0.9599	4.684	0.9871	4.772	0.9878	5.216	0.9853	5.187	0.9857	3.589	1.0211
583.43			4.897	0.9701	4.903	0.961	5.042	0.9546	4.688	0.988	4.791	0.9917	5.243	0.9904	5.233	0.9945	3.595	1.0228
583.63			4.899	0.9705	4.911	0.9626	5.044	0.9549	4.695	0.9895	4.756	0.9845	5.218	0.9856	5.233	0.9945	3.579	1.0182
583.82			4.922	0.975	4.896	0.9596	5.035	0.9532	4.69	0.9884	4.766	0.9865	5.225	0.987	5.257	0.999	3.602	1.0248
584.01			4.905	0.9717	4.935	0.9673	5.025	0.9513	4.657	0.9815	4.754	0.9841	5.214	0.9849	5.224	0.9928	3.631	1.033
584.2			4.864	0.9635	4.951	0.9704	5.043	0.9548	4.662	0.9825	4.807	0.995	5.216	0.9853	5.223	0.9926	3.579	1.0182
584.39			4.876	0.9659	4.98	0.9761	5.077	0.9612	4.714	0.9935	4.765	0.9863	5.187	0.9798	5.162	0.981	3.588	1.0208
584.59			4.875	0.9657	4.99	0.978	5.066	0.9591	4.763	1.0038	4.792	0.9919	5.222	0.9864	5.206	0.9894	3.637	1.0347
584.78			4.869	0.9645	4.999	0.9798	5.021	0.9506	4.742	0.9994	4.787	0.9909	5.22	0.986	5.217	0.9914	3.627	1.0319
584.97			4.93	0.9766	5.05	0.9898	5.033	0.9529	4.745	1	4.791	0.9917	5.173	0.9771	5.196	0.9875	3.573	1.0165
585.16			4.924	0.9754	5.042	0.9882	5.027	0.9517	4.744	0.9998	4.763	0.9859	5.226	0.9872	5.156	0.9799	3.545	1.0085
585.35			4.829	0.9566	5.018	0.9835	5.011	0.9487	4.755	1.0021	4.795	0.9925	5.26	0.9936	5.211	0.9903	3.543	1.008
585.55			4.845	0.9598	5.011	0.9822	4.986	0.944	4.704	0.9914	4.778	0.989	5.239	0.9896	5.23	0.9939	3.515	1
585.74			4.842	0.9592	5.024	0.9847	4.983	0.9434	4.722	0.9952	4.784	0.9903	5.234	0.9887	5.196	0.9875	3.543	1.008
585.93			4.814	0.9536	5.044	0.9886	5.02	0.9504	4.728	0.9964	4.827	0.9992	5.25	0.9917	5.188	0.9859	3.554	1.0111
586.12			4.817	0.9542	5.037	0.9873	5.046	0.9553	4.752	1.0015	4.839	1.0017	5.301	1.0013	5.189	0.9861	3.546	1.0088
586.31			4.896	0.9699	5.057	0.9912	5.04	0.9542	4.783	1.008	4.836	1.001	5.33	1.0068	5.234	0.9947	3.602	1.0248
586.51			4.929	0.9764	5.073	0.9943	5.071	0.9601	4.761	1.0034	4.834	1.0006	5.331	1.007	5.226	0.9932	3.533	1.0051
586.7			4.962	0.983	5.056	0.991	5.075	0.9608	4.738	0.9985	4.869	1.0079	5.333	1.0074	5.163	0.9812	3.553	1.0108
586.89			4.919	0.9744	5.012	0.9824	5.123	0.9699	4.763	1.0038	4.896	1.0135	5.358	1.0121	5.158	0.9802	3.576	1.0174
587.08			4.892	0.9691	5.005	0.981	5.116	0.9686	4.771	1.0055	4.923	1.019	5.379	1.0161	5.215	0.9911	3.593	1.0222
587.27			4.914	0.9735	5.027	0.9853	5.144	0.9739	4.754	1.0019	4.894	1.013	5.289	0.9991	5.235	0.9949	3.624	1.031
587.47			4.919	0.9744	5.047	0.9892	5.156	0.9761	4.714	0.9935	4.901	1.0145	5.321	1.0051	5.243	0.9964	3.617	1.029
587.66			4.924	0.9754	5.023	0.9845	5.18	0.9807	4.757	1.0025	4.885	1.0112	5.317	1.0043	5.204	0.989	3.6	1.0242
587.85			4.922	0.975	5.018	0.9835	5.18	0.9807	4.741	0.9992	4.947	1.024	5.362	1.0128	5.298	1.0068	3.583	1.0193
588.04			4.972	0.9849	5.033	0.9865	5.201	0.9847	4.794	1.0103	4.875	1.0091	5.33	1.0068	5.299	1.007	3.566	1.0145
588.23			4.955	0.9816	5.028	0.9855	5.22	0.9883	4.805	1.0126	4.883	1.0108	5.303	1.0017	5.317	1.0105	3.587	1.0205
588.42			4.982	0.9869	5.005	0.981	5.242	0.9924	4.783	1.008	4.857	1.0054	5.252	0.9921	5.285	1.0044	3.587	1.0205
588.62			4.935	0.9776	5.004	0.9808	5.197	0.9839	4.797	1.011	4.866	1.0072	5.249	0.9915	5.319	1.0108	3.62	1.0299
588.81			4.914	0.9735	4.993	0.9786	5.201	0.9847	4.822	1.0162	4.752	0.9836	5.205	0.9832	5.346	1.016	3.587	1.0205
589			5.002	0.9909	5.046	0.989	5.192	0.983	4.854	1.023	4.76	0.9853	5.172	0.977	5.34	1.0148	3.541	1.0074
589.19			5.004	0.9913	5.026	0.9851	5.249	0.9938	4.851	1.0223	4.752	0.9836	5.132	0.9694	5.305	1.0082	3.53	1.0043
589.38			4.973	0.9851	5.008	0.9816	5.282	1	4.902	1.0331	4.826	0.999	5.158	0.9743	5.323	1.0116	3.53	1.0043
589.57			4.997	0.9899	4.969	0.9739	5.274	0.9985	4.951	1.0434	4.823	0.9983	5.133	0.9696	5.273	1.0021	3.518	1.0009
589.77			4.984	0.9873	4.997	0.9794	5.271	0.9979	4.968	1.047	4.817	0.9971	5.126	0.9683	5.282	1.0038	3.545	1.0085
589.96			5.007	0.9919	4.993	0.9786	5.26	0.9958	4.994	1.0525	4.828	0.9994	5.155	0.9737	5.279	1.0032	3.573	1.0165
590.15			4.976	0.9857	4.981	0.9763	5.246	0.9932	5.007	1.0552	4.84	1.0019	5.213	0.9847	5.283	1.004	3.587	1.0205
590.34			4.98	0.9865	4.938	0.9679	5.209	0.9862	4.972	1.0478	4.839	1.0017	5.182	0.9788	5.284	1.0042	3.544	1.0083
590.53			4.982	0.9869	4.946	0.9694	5.202	0.9849	4.989	1.0514	4.892	1.0126	5.239	0.9896	5.295	1.0063	3.532	1.0048
590.72			4.999	0.9903	4.979	0.9759	5.199	0.9843	4.986	1.0508	4.884	1.011	5.226	0.9872	5.231	0.9941	3.539	1.0068
590.92			5.072	1.0048	5.022	0.9843	5.213	0.9869	4.972	1.0478	4.934	1.0213	5.246	0.9909	5.204	0.989	3.53	1.0043
591.11			5.02	0.9945	4.971	0.9743	5.215	0.9873	4.936	1.0403	4.923	1.019	5.255	0.9926	5.171	0.9827	3.538	1.0065
591.3			4.977	0.9859	4.965	0.9731	5.152	0.9754	4.927	1.0384	4.914	1.0172	5.276	0.9966	5.155	0.9797	3.547	1.0091
591.49			4.927	0.976	4.955	0.9712	5.158	0.9765	4.909	1.0346	4.912	1.0168	5.31	1.003	5.163	0.9812	3.494	0.994
591.68			4.918	0.9742	4.961	0.9724	5.124	0.9701	4.859	1.024	4.905	1.0153	5.292	0.9996	5.181	0.9846	3.489	0.9926
591.87			4.964	0.9834	4.981	0.9763	5.161	0.9771	4.888	1.0301	4.916	1.0176	5.29	0.9992	5.123	0.9736	3.487	0.992
592.07			4.992	0.9889	4.997	0.9794	5.202	0.9849	4.877	1.0278	4.883	1.0108	5.241	0.99	5.112	0.9715	3.461	0.9846
592.26			5.009	0.9923	5.063	0.9924	5.216	0.9875	4.853	1.0228	4.879	1.0099	5.18	0.9785	5.109	0.9709	3.444	0.9798
592.45			4.994	0.9893	5.11	1.0016	5.205	0.9854	4.873	1.027	4.881	1.0103	5.186	0.9796	5.116	0.9723	3.453	0.9824
592.64			4.909	0.9725	5.038	0.9875	5.155	0.976	4.832	1.0183	4.856	1.0052	5.178	0.9781	5.144	0.9776	3.47	0.9872
592.83			4.914	0.9735	5.007	0.9814	5.184	0.9814	4.799	1.0114	4.868	1.0077	5.171	0.9768	5.216	0.9913	3.447	0.9807
593.02			4.808	0.9525	4.969	0.9739	5.108	0.9671	4.765	1.0042	4.872	1.0085	5.147	0.9722	5.242	0.9962	3.428	0.9752
593.21			4.798	0.9505	4.99	0.978	5.086	0.9629	4.791	1.0097	4.889	1.012	5.18	0.9785	5.32	1.011	3.457	0.9835
593.41			4.811	0.9531	4.975	0.9751	5.091	0.9638	4.817	1.0152	4.912	1.0168	5.198	0.9819	5.311	1.0093	3.46	0.9844
593.6			4.867	0.9641	4.978	0.9757	5.077	0.9612	4.817	1.0152	4.874	1.0089	5.153	0.9734	5.308	1.0087	3.477	0.9892
593.79			4.859	0.9626	4.967	0.9735	5.136	0.9724	4.845	1.0211	4.89	1.0122	5.156	0.9739	5.299	1.007	3.492	0.9935
593.98			4.864	0.9635	4.973	0.9747	5.114	0.9682	4.799	1.0114	4.902	1.0147	5.172	0.977	5.381	1.0226	3.5	0.9957
594.17			4.857	0.9622	4.934	0.9671	5.105	0.9665	4.8	1.0116	4.882	1.0106	5.18	0.9785	5.318	1.0106	3.465	0.9858
594.36			4.846	0.96	4.897	0.9598	5.118	0.969	4.785	1.0084	4.898	1.0139	5.183	0.979	5.294	1.0061	3.467	0.9863
594.55			4.84	0.9588	4.897	0.9598	5.123	0.9699	4.773	1.0059	4.876	1.0093	5.229	0.9877	5.266	1.0008	3.5	0.9957
594.74			4.881	0.9669	4.935	0.9673	5.207	0.9858	4.79	1.0095	4.82	0.9977	5.202	0.9826	5.221	0.9922	3.497	0.9949
594.94			4.845	0.9598	4.944	0.969	5.205	0.9854	4.818	1.0154	4.81	0.9957	5.206	0.9834	5.182	0.9848	3.474	0.9883
595.13			4.872	0.9651	4.964	0.973	5.239	0.9919	4.831	1.0181	4.786	0.9907	5.193	0.9809	5.192	0.9867	3.482	0.9906
595.32			4.842	0.9592	4.97	0.9741	5.241	0.9922	4.809	1.0135	4.781	0.9897	5.171	0.9768	5.186	0.9856	3.486	0.9917
595.51			4.856	0.962	4.987	0.9775	5.21	0.9864	4.761	1.0034	4.736	0.9803	5.134	0.9698	5.187	0.9857	3.493	0.9937
595.7			4.822	0.9552	4.968	0.9737	5.182	0.9811	4.761	1.0034	4.746	0.9824	5.163	0.9753	5.163	0.9812	3.482	0.9906
595.89			4.803	0.9515	4.957	0.9716	5.131	0.9714	4.766	1.0044	4.728	0.9787	5.181	0.9787	5.172	0.9829	3.46	0.9844
596.08			4.79	0.9489	4.924	0.9651	5.142	0.9735	4.771	1.0055	4.697	0.9723	5.182	0.9788	5.124	0.9738	3.422	0.9735
596.28			4.744	0.9398	4.928	0.9659	5.154	0.9758	4.769	1.0051	4.692	0.9712	5.205	0.9832	5.151	0.9789	3.442	0.9792
596.47			4.754	0.9418	4.929	0.9661	5.134	0.972	4.766	1.0044	4.715	0.976	5.234	0.9887	5.208	0.9897	3.476	0.9889
596.66			4.784	0.9477	4.92	0.9643	5.148	0.9746	4.794	1.0103	4.713	0.9756	5.207	0.9836	5.24	0.9958	3.488	0.9923
596.85			4.812	0.9532	4.911	0.9626	5.072	0.9602	4.798	1.0112	4.763	0.9859	5.24	0.9898	5.251	0.9979	3.476	0.9889
597.04			4.845	0.9598	4.883	0.9571	5.111	0.9676	4.786	1.0086	4.766	0.9865	5.235	0.9889	5.28	1.0034	3.505	0.9972
597.23			4.856	0.962	4.914	0.9632	5.146	0.9743	4.827	1.0173	4.782	0.9899	5.271	0.9957	5.263	1.0002	3.536	1.006
597.42			4.879	0.9665	4.92	0.9643	5.175	0.9797	4.854	1.023	4.757	0.9847	5.327	1.0062	5.237	0.9952	3.535	1.0057
597.61			4.842	0.9592	4.913	0.963	5.24	0.992	4.861	1.0244	4.806	0.9948	5.369	1.0142	5.28	1.0034	3.528	1.0037
597.8			4.906	0.9719	4.938	0.9679	5.275	0.9987	4.901	1.0329	4.815	0.9967	5.386	1.0174	5.312	1.0095	3.562	1.0134
598			4.934	0.9774	4.981	0.9763	5.328	1.0087	4.891	1.0308	4.794	0.9923	5.353	1.0111	5.29	1.0053	3.555	1.0114
598.19			4.927	0.976	4.983	0.9767	5.328	1.0087	4.889	1.0303	4.814	0.9965	5.343	1.0093	5.297	1.0067	3.59	1.0213
598.38			4.924	0.9754	4.98	0.9761	5.341	1.0112	4.886	1.0297	4.817	0.9971	5.318	1.0045	5.358	1.0182	3.607	1.0262
598.57			4.856	0.962	4.945	0.9692	5.303	1.004	4.865	1.0253	4.826	0.999	5.336	1.0079	5.342	1.0152	3.565	1.0142
598.76			4.822	0.9552	4.936	0.9675	5.31	1.0053	4.877	1.0278	4.83	0.9998	5.347	1.01	5.343	1.0154	3.53	1.0043
598.95			4.756	0.9422	4.936	0.9675	5.314	1.0061	4.857	1.0236	4.788	0.9911	5.311	1.0032	5.363	1.0192	3.522	1.002
599.14			4.717	0.9344	4.944	0.969	5.275	0.9987	4.853	1.0228	4.769	0.9872	5.336	1.0079	5.35	1.0167	3.531	1.0046
599.33			4.706	0.9323	4.898	0.96	5.249	0.9938	4.806	1.0129	4.747	0.9826	5.28	0.9974	5.328	1.0125	3.508	0.998
599.52			4.706	0.9323	4.888	0.9581	5.236	0.9913	4.812	1.0141	4.762	0.9857	5.223	0.9866	5.344	1.0156	3.475	0.9886
599.72			4.719	0.9348	4.887	0.9579	5.197	0.9839	4.826	1.0171	4.754	0.9841	5.23	0.9879	5.344	1.0156	3.465	0.9858
599.91			4.63	0.9172	4.832	0.9471	5.132	0.9716	4.742	0.9994	4.746	0.9824	5.231	0.9881	5.334	1.0137	3.472	0.9878
600.1			4.572	0.9057	4.767	0.9343	5.079	0.9616	4.724	0.9956	4.788	0.9911	5.269	0.9953	5.407	1.0276	3.524	1.0026
600.29			4.545	0.9004	4.729	0.9269	5.036	0.9534	4.702	0.9909	4.745	0.9822	5.246	0.9909	5.384	1.0232	3.492	0.9935
600.48			4.539	0.8992	4.705	0.9222	5.005	0.9476	4.667	0.9836	4.731	0.9793	5.248	0.9913	5.352	1.0171	3.476	0.9889
600.67			4.614	0.914	4.734	0.9279	5.021	0.9506	4.72	0.9947	4.643	0.9611	5.198	0.9819	5.349	1.0165	3.478	0.9895
600.86			4.589	0.9091	4.746	0.9302	5.006	0.9477	4.678	0.9859	4.613	0.9549	5.17	0.9766	5.312	1.0095	3.435	0.9772
601.05			4.616	0.9144	4.769	0.9347	5.063	0.9585	4.688	0.988	4.588	0.9497	5.155	0.9737	5.222	0.9924	3.38	0.9616
601.24			4.624	0.916	4.768	0.9345	5.062	0.9583	4.687	0.9878	4.576	0.9472	5.102	0.9637	5.183	0.985	3.338	0.9496
601.43			4.594	0.9101	4.74	0.929	5.038	0.9538	4.633	0.9764	4.576	0.9472	5.12	0.9671	5.208	0.9897	3.339	0.9499
601.62			4.517	0.8948	4.711	0.9234	5.019	0.9502	4.584	0.9661	4.548	0.9414	5.092	0.9618	5.182	0.9848	3.317	0.9437
601.82			4.506	0.8926	4.667	0.9147	5.006	0.9477	4.591	0.9675	4.562	0.9443	5.133	0.9696	5.159	0.9804	3.344	0.9514
602.01			4.525	0.8964	4.688	0.9189	5.009	0.9483	4.619	0.9734	4.521	0.9358	5.082	0.96	5.139	0.9766	3.3	0.9388
602.2			4.499	0.8912	4.634	0.9083	4.96	0.939	4.591	0.9675	4.532	0.9381	5.12	0.9671	5.065	0.9626	3.269	0.93
602.39			4.502	0.8918	4.639	0.9093	4.979	0.9426	4.624	0.9745	4.571	0.9462	5.087	0.9609	5.084	0.9662	3.287	0.9351
602.58			4.489	0.8893	4.673	0.9159	4.998	0.9462	4.626	0.9749	4.582	0.9485	5.086	0.9607	5.061	0.9618	3.309	0.9414
602.77			4.46	0.8835	4.625	0.9065	4.984	0.9436	4.568	0.9627	4.636	0.9596	5.099	0.9632	5.031	0.9561	3.288	0.9354
602.96			4.488	0.8891	4.618	0.9051	5.009	0.9483	4.617	0.973	4.644	0.9613	5.085	0.9605	5.028	0.9555	3.336	0.9491
603.15			4.474	0.8863	4.576	0.8969	4.983	0.9434	4.611	0.9718	4.686	0.97	5.106	0.9645	5.083	0.966	3.414	0.9713
603.34			4.436	0.8788	4.566	0.8949	4.97	0.9409	4.592	0.9678	4.717	0.9764	5.185	0.9794	5.135	0.9759	3.455	0.9829
603.53			4.449	0.8813	4.572	0.8961	4.987	0.9441	4.644	0.9787	4.728	0.9787	5.207	0.9836	5.117	0.9724	3.462	0.9849
603.72			4.522	0.8958	4.589	0.8995	4.966	0.9402	4.644	0.9787	4.738	0.9807	5.225	0.987	5.13	0.9749	3.475	0.9886
603.91			4.556	0.9025	4.649	0.9112	5.021	0.9506	4.636	0.977	4.766	0.9865	5.213	0.9847	5.164	0.9814	3.462	0.9849
604.11			4.567	0.9047	4.666	0.9145	5.071	0.9601	4.635	0.9768	4.774	0.9882	5.246	0.9909	5.178	0.984	3.477	0.9892
604.3			4.66	0.9231	4.774	0.9357	5.177	0.9801	4.698	0.9901	4.784	0.9903	5.229	0.9877	5.218	0.9916	3.496	0.9946
604.49			4.658	0.9227	4.808	0.9424	5.194	0.9833	4.722	0.9952	4.811	0.9959	5.319	1.0047	5.264	1.0004	3.479	0.9898
604.68			4.688	0.9287	4.785	0.9379	5.156	0.9761	4.748	1.0006	4.839	1.0017	5.317	1.0043	5.282	1.0038	3.48	0.99
604.87			4.683	0.9277	4.817	0.9441	5.209	0.9862	4.776	1.0065	4.802	0.994	5.291	0.9994	5.277	1.0029	3.494	0.994
605.06			4.703	0.9317	4.83	0.9467	5.206	0.9856	4.747	1.0004	4.834	1.0006	5.314	1.0038	5.272	1.0019	3.497	0.9949
605.25			4.722	0.9354	4.86	0.9526	5.247	0.9934	4.765	1.0042	4.855	1.005	5.316	1.0042	5.278	1.003	3.474	0.9883
605.44			4.79	0.9489	4.884	0.9573	5.324	1.008	4.827	1.0173	4.885	1.0112	5.321	1.0051	5.297	1.0067	3.484	0.9912
605.63			4.824	0.9556	4.89	0.9584	5.372	1.017	4.842	1.0204	4.932	1.0209	5.333	1.0074	5.324	1.0118	3.509	0.9983
605.82			4.843	0.9594	4.878	0.9561	5.407	1.0237	4.875	1.0274	4.955	1.0257	5.332	1.0072	5.335	1.0139	3.532	1.0048
606.01			4.785	0.9479	4.817	0.9441	5.359	1.0146	4.863	1.0249	4.903	1.0149	5.28	0.9974	5.309	1.0089	3.532	1.0048
606.2			4.809	0.9527	4.809	0.9426	5.357	1.0142	4.882	1.0289	4.94	1.0226	5.295	1.0002	5.333	1.0135	3.521	1.0017
606.39			4.769	0.9447	4.775	0.9359	5.279	0.9994	4.868	1.0259	4.891	1.0124	5.262	0.994	5.282	1.0038	3.493	0.9937
606.58			4.714	0.9338	4.712	0.9236	5.273	0.9983	4.818	1.0154	4.876	1.0093	5.239	0.9896	5.23	0.9939	3.532	1.0048
606.77			4.704	0.9319	4.691	0.9194	5.28	0.9996	4.83	1.0179	4.844	1.0027	5.239	0.9896	5.239	0.9956	3.524	1.0026
606.96			4.731	0.9372	4.697	0.9206	5.264	0.9966	4.839	1.0198	4.867	1.0075	5.246	0.9909	5.244	0.9966	3.523	1.0023
607.15			4.724	0.9358	4.701	0.9214	5.23	0.9902	4.824	1.0166	4.836	1.001	5.209	0.9839	5.282	1.0038	3.498	0.9952
607.35			4.702	0.9315	4.659	0.9132	5.186	0.9818	4.817	1.0152	4.769	0.9872	5.186	0.9796	5.249	0.9975	3.482	0.9906
607.54			4.641	0.9194	4.61	0.9036	5.09	0.9637	4.758	1.0027	4.701	0.9731	5.112	0.9656	5.168	0.9821	3.463	0.9852
607.73			4.643	0.9198	4.664	0.9142	5.081	0.9619	4.77	1.0053	4.681	0.969	5.099	0.9632	5.16	0.9806	3.438	0.9781
607.92			4.598	0.9109	4.653	0.912	5.061	0.9582	4.707	0.992	4.662	0.965	5.068	0.9573	5.126	0.9742	3.393	0.9653
608.11			4.612	0.9136	4.687	0.9187	5.059	0.9578	4.733	0.9975	4.649	0.9623	5.053	0.9545	5.118	0.9726	3.37	0.9587
608.3			4.582	0.9077	4.7	0.9212	5.063	0.9585	4.689	0.9882	4.655	0.9636	5.032	0.9505	5.089	0.9671	3.371	0.959
608.49			4.583	0.9079	4.689	0.9191	5.093	0.9642	4.636	0.977	4.639	0.9603	5.047	0.9533	5.106	0.9704	3.356	0.9548
608.68			4.598	0.9109	4.716	0.9243	5.078	0.9614	4.672	0.9846	4.615	0.9553	5.03	0.9501	5.092	0.9677	3.346	0.9519
608.87			4.593	0.9099	4.755	0.932	5.105	0.9665	4.66	0.9821	4.623	0.9569	5.032	0.9505	5.051	0.9599	3.329	0.9471
609.06			4.622	0.9156	4.758	0.9326	5.134	0.972	4.668	0.9838	4.645	0.9615	5.047	0.9533	5.064	0.9624	3.322	0.9451
609.25			4.623	0.9158	4.765	0.9339	5.171	0.979	4.677	0.9857	4.682	0.9692	5.101	0.9635	5.086	0.9666	3.379	0.9613
609.44			4.648	0.9208	4.77	0.9349	5.172	0.9792	4.667	0.9836	4.714	0.9758	5.118	0.9668	5.129	0.9747	3.392	0.965
609.63			4.742	0.9394	4.839	0.9485	5.263	0.9964	4.708	0.9922	4.719	0.9768	5.135	0.97	5.154	0.9795	3.347	0.9522
609.82			4.733	0.9376	4.797	0.9402	5.258	0.9955	4.662	0.9825	4.728	0.9787	5.167	0.976	5.174	0.9833	3.336	0.9491
610.01			4.766	0.9441	4.845	0.9496	5.29	1.0015	4.701	0.9907	4.704	0.9737	5.175	0.9775	5.151	0.9789	3.331	0.9477
610.2			4.79	0.9489	4.846	0.9498	5.32	1.0072	4.695	0.9895	4.743	0.9818	5.244	0.9906	5.166	0.9818	3.335	0.9488
610.39			4.817	0.9542	4.825	0.9457	5.311	1.0055	4.744	0.9998	4.711	0.9752	5.216	0.9853	5.167	0.9819	3.323	0.9454
610.58			4.801	0.9511	4.805	0.9418	5.307	1.0047	4.771	1.0055	4.716	0.9762	5.208	0.9838	5.127	0.9743	3.306	0.9405
610.77			4.798	0.9505	4.82	0.9447	5.287	1.0009	4.742	0.9994	4.713	0.9756	5.2	0.9822	5.111	0.9713	3.304	0.94
610.96			4.78	0.9469	4.788	0.9385	5.257	0.9953	4.736	0.9981	4.69	0.9708	5.21	0.9841	5.125	0.974	3.301	0.9391
611.15			4.775	0.9459	4.798	0.9404	5.236	0.9913	4.713	0.9933	4.668	0.9663	5.208	0.9838	5.081	0.9656	3.3	0.9388
611.34			4.736	0.9382	4.731	0.9273	5.21	0.9864	4.736	0.9981	4.656	0.9638	5.195	0.9813	5.028	0.9555	3.266	0.9292
611.53			4.693	0.9297	4.756	0.9322	5.204	0.9852	4.727	0.9962	4.655	0.9636	5.19	0.9804	5.033	0.9565	3.25	0.9246
611.72			4.62	0.9152	4.736	0.9283	5.111	0.9676	4.746	1.0002	4.628	0.958	5.174	0.9773	5.003	0.9508	3.233	0.9198
611.91			4.622	0.9156	4.738	0.9287	5.104	0.9663	4.818	1.0154	4.618	0.9559	5.163	0.9753	5.006	0.9513	3.249	0.9243
612.1			4.6	0.9113	4.697	0.9206	5.124	0.9701	4.842	1.0204	4.618	0.9559	5.163	0.9753	5.053	0.9603	3.281	0.9334
612.29			4.576	0.9065	4.716	0.9243	5.116	0.9686	4.854	1.023	4.589	0.9499	5.109	0.9651	5.022	0.9544	3.237	0.9209
612.48			4.544	0.9002	4.722	0.9255	5.096	0.9648	4.859	1.024	4.603	0.9528	5.107	0.9647	4.992	0.9487	3.245	0.9232
612.67			4.563	0.9039	4.765	0.9339	5.092	0.964	4.899	1.0325	4.644	0.9613	5.097	0.9628	5.031	0.9561	3.302	0.9394
612.86			4.627	0.9166	4.767	0.9343	5.127	0.9707	4.896	1.0318	4.703	0.9735	5.139	0.9707	5.12	0.973	3.323	0.9454
613.05			4.657	0.9225	4.763	0.9336	5.105	0.9665	4.857	1.0236	4.71	0.975	5.157	0.9741	5.103	0.9698	3.318	0.944
613.24			4.581	0.9075	4.759	0.9328	5.079	0.9616	4.861	1.0244	4.715	0.976	5.116	0.9664	5.132	0.9753	3.334	0.9485
613.43			4.579	0.9071	4.789	0.9387	5.091	0.9638	4.839	1.0198	4.68	0.9687	5.051	0.9541	5.108	0.9707	3.307	0.9408
613.62			4.621	0.9154	4.769	0.9347	5.066	0.9591	4.845	1.0211	4.674	0.9675	5.023	0.9488	5.078	0.965	3.284	0.9343
613.81			4.623	0.9158	4.78	0.9369	5.124	0.9701	4.8	1.0116	4.702	0.9733	5.035	0.9511	5.081	0.9656	3.297	0.938
614			4.588	0.9089	4.767	0.9343	5.093	0.9642	4.765	1.0042	4.671	0.9669	4.987	0.942	5.043	0.9584	3.256	0.9263
614.19			4.605	0.9122	4.783	0.9375	5.046	0.9553	4.718	0.9943	4.682	0.9692	4.984	0.9414	4.984	0.9472	3.233	0.9198
614.38			4.614	0.914	4.747	0.9304	4.995	0.9457	4.682	0.9867	4.659	0.9644	4.979	0.9405	4.97	0.9445	3.277	0.9323
614.57			4.58	0.9073	4.769	0.9347	4.964	0.9398	4.67	0.9842	4.719	0.9768	5.041	0.9522	5.012	0.9525	3.285	0.9346
614.76			4.624	0.916	4.745	0.93	4.962	0.9394	4.647	0.9793	4.704	0.9737	5.083	0.9601	5.039	0.9576	3.277	0.9323
614.95			4.549	0.9011	4.735	0.9281	4.952	0.9375	4.675	0.9852	4.652	0.9629	5.041	0.9522	4.976	0.9456	3.236	0.9206
615.14			4.52	0.8954	4.769	0.9347	4.912	0.93	4.678	0.9859	4.642	0.9609	5	0.9445	4.944	0.9396	3.239	0.9215
615.33			4.56	0.9033	4.717	0.9245	4.915	0.9305	4.712	0.993	4.606	0.9534	5.026	0.9494	4.909	0.9329	3.232	0.9195
615.52			4.524	0.8962	4.681	0.9175	4.91	0.9296	4.68	0.9863	4.637	0.9598	5.093	0.962	4.933	0.9375	3.228	0.9183
615.71			4.533	0.898	4.745	0.93	4.997	0.946	4.688	0.988	4.618	0.9559	5.103	0.9639	4.964	0.9434	3.231	0.9192
615.9			4.571	0.9055	4.726	0.9263	4.935	0.9343	4.683	0.9869	4.67	0.9667	5.052	0.9543	4.962	0.943	3.281	0.9334
616.09			4.559	0.9031	4.73	0.9271	4.93	0.9334	4.637	0.9772	4.71	0.975	5.076	0.9588	4.965	0.9436	3.341	0.9505
616.28			4.505	0.8924	4.767	0.9343	4.927	0.9328	4.7	0.9905	4.732	0.9795	5.075	0.9586	4.978	0.946	3.353	0.9539
616.47			4.537	0.8988	4.807	0.9422	4.988	0.9443	4.768	1.0048	4.689	0.9706	5.026	0.9494	4.973	0.9451	3.313	0.9425
616.66			4.563	0.9039	4.789	0.9387	4.979	0.9426	4.744	0.9998	4.567	0.9454	4.957	0.9363	4.891	0.9295	3.289	0.9357
616.85			4.517	0.8948	4.753	0.9316	4.985	0.9438	4.719	0.9945	4.589	0.9499	4.906	0.9267	4.86	0.9236	3.277	0.9323
617.04			4.516	0.8946	4.738	0.9287	4.937	0.9347	4.658	0.9817	4.635	0.9594	4.895	0.9246	4.888	0.9289	3.327	0.9465
617.23			4.56	0.9033	4.71	0.9232	4.996	0.9459	4.745	1	4.662	0.965	4.885	0.9227	4.925	0.936	3.284	0.9343
617.42			4.539	0.8992	4.692	0.9196	4.991	0.9449	4.738	0.9985	4.701	0.9731	4.924	0.9301	4.961	0.9428	3.291	0.9363
617.61			4.563	0.9039	4.734	0.9279	4.939	0.9351	4.767	1.0046	4.688	0.9704	4.929	0.9311	4.931	0.9371	3.289	0.9357
617.8			4.563	0.9039	4.706	0.9224	4.886	0.925	4.775	1.0063	4.694	0.9716	4.915	0.9284	4.899	0.931	3.271	0.9306
617.99			4.512	0.8938	4.701	0.9214	4.931	0.9335	4.799	1.0114	4.681	0.969	4.942	0.9335	4.902	0.9316	3.261	0.9277
618.18			4.505	0.8924	4.643	0.91	4.875	0.9229	4.795	1.0105	4.668	0.9663	4.888	0.9233	4.878	0.927	3.22	0.9161
618.37			4.603	0.9118	4.607	0.903	4.894	0.9265	4.762	1.0036	4.712	0.9754	4.952	0.9354	4.924	0.9358	3.257	0.9266
618.56			4.509	0.8932	4.527	0.8873	4.811	0.9108	4.679	0.9861	4.792	0.9919	5.007	0.9458	4.946	0.9399	3.324	0.9457
618.75			4.518	0.895	4.531	0.8881	4.843	0.9169	4.703	0.9911	4.817	0.9971	5.036	0.9513	5.016	0.9532	3.347	0.9522
618.94			4.535	0.8984	4.56	0.8938	4.824	0.9133	4.681	0.9865	4.837	1.0012	5.06	0.9558	5.083	0.966	3.385	0.963
619.13			4.549	0.9011	4.539	0.8897	4.835	0.9154	4.702	0.9909	4.738	0.9807	5.046	0.9532	5.049	0.9595	3.316	0.9434
619.32			4.537	0.8988	4.556	0.893	4.86	0.9201	4.641	0.9781	4.787	0.9909	5.077	0.959	5.091	0.9675	3.386	0.9633
619.51			4.515	0.8944	4.59	0.8996	4.872	0.9224	4.62	0.9737	4.784	0.9903	5.048	0.9535	5.052	0.9601	3.351	0.9533
619.7			4.556	0.9025	4.557	0.8932	4.935	0.9343	4.556	0.9602	4.809	0.9954	5.033	0.9507	5.123	0.9736	3.366	0.9576
619.89			4.566	0.9045	4.569	0.8955	4.943	0.9358	4.585	0.9663	4.858	1.0056	5.073	0.9583	5.159	0.9804	3.426	0.9747
620.08			4.642	0.9196	4.567	0.8951	4.922	0.9318	4.578	0.9648	4.832	1.0002	5.025	0.9492	5.134	0.9757	3.378	0.961
620.27			4.628	0.9168	4.623	0.9061	4.958	0.9387	4.621	0.9739	4.835	1.0008	5.072	0.9581	5.218	0.9916	3.392	0.965
620.46			4.562	0.9037	4.569	0.8955	4.941	0.9354	4.591	0.9675	4.849	1.0037	5.042	0.9524	5.243	0.9964	3.393	0.9653
620.65			4.625	0.9162	4.663	0.914	5.007	0.9479	4.626	0.9749	4.808	0.9952	5.066	0.9569	5.241	0.996	3.353	0.9539
620.84			4.626	0.9164	4.625	0.9065	4.923	0.932	4.601	0.9697	4.877	1.0095	5.106	0.9645	5.239	0.9956	3.348	0.9525
621.03			4.608	0.9128	4.63	0.9075	4.925	0.9324	4.649	0.9798	4.807	0.995	5.116	0.9664	5.145	0.9778	3.271	0.9306
621.22			4.639	0.919	4.657	0.9128	4.931	0.9335	4.682	0.9867	4.861	1.0062	5.101	0.9635	5.154	0.9795	3.294	0.9371
621.41			4.693	0.9297	4.738	0.9287	4.924	0.9322	4.767	1.0046	4.8	0.9936	5.063	0.9564	5.087	0.9667	3.191	0.9078
621.6			4.711	0.9332	4.729	0.9269	4.906	0.9288	4.749	1.0008	4.808	0.9952	5.081	0.9598	5.106	0.9704	3.177	0.9038
621.79			4.733	0.9376	4.782	0.9373	4.88	0.9239	4.81	1.0137	4.768	0.987	5.062	0.9562	5.054	0.9605	3.147	0.8953
621.97			4.662	0.9235	4.788	0.9385	4.854	0.919	4.712	0.993	4.745	0.9822	5.035	0.9511	5.006	0.9513	3.103	0.8828
622.16			4.587	0.9087	4.747	0.9304	4.782	0.9053	4.684	0.9871	4.726	0.9783	5.127	0.9685	5.092	0.9677	3.189	0.9073
622.35			4.612	0.9136	4.745	0.93	4.834	0.9152	4.692	0.9888	4.744	0.982	5.143	0.9715	5.024	0.9548	3.17	0.9018
622.54			4.612	0.9136	4.777	0.9363	4.758	0.9008	4.656	0.9812	4.65	0.9625	5.102	0.9637	4.913	0.9337	3.123	0.8885
622.73			4.635	0.9182	4.739	0.9289	4.78	0.905	4.652	0.9804	4.665	0.9656	5.102	0.9637	4.895	0.9303	3.164	0.9001
622.92			4.628	0.9168	4.741	0.9292	4.841	0.9165	4.654	0.9808	4.641	0.9607	5.022	0.9486	4.884	0.9282	3.158	0.8984
623.11			4.647	0.9206	4.76	0.933	4.883	0.9245	4.607	0.9709	4.688	0.9704	5.003	0.945	4.883	0.928	3.209	0.9129
623.3			4.664	0.9239	4.777	0.9363	4.914	0.9303	4.619	0.9734	4.679	0.9685	4.968	0.9384	4.851	0.9219	3.21	0.9132
623.49			4.64	0.9192	4.72	0.9251	4.918	0.9311	4.534	0.9555	4.712	0.9754	5	0.9445	4.912	0.9335	3.283	0.934
623.68			4.653	0.9218	4.743	0.9296	4.922	0.9318	4.538	0.9564	4.68	0.9687	4.979	0.9405	4.929	0.9367	3.328	0.9468
623.87			4.631	0.9174	4.741	0.9292	4.887	0.9252	4.514	0.9513	4.686	0.97	5.032	0.9505	4.945	0.9398	3.324	0.9457
624.06			4.665	0.9241	4.743	0.9296	4.927	0.9328	4.62	0.9737	4.676	0.9679	4.981	0.9409	4.917	0.9344	3.357	0.955
624.25			4.653	0.9218	4.77	0.9349	4.919	0.9313	4.609	0.9713	4.774	0.9882	4.987	0.942	4.884	0.9282	3.268	0.9297
624.44			4.641	0.9194	4.776	0.9361	4.897	0.9271	4.6	0.9694	4.71	0.975	4.993	0.9431	4.874	0.9263	3.269	0.93
624.63			4.661	0.9233	4.816	0.9439	4.965	0.94	4.644	0.9787	4.784	0.9903	5.019	0.9481	4.944	0.9396	3.28	0.9331
624.82			4.643	0.9198	4.746	0.9302	4.872	0.9224	4.641	0.9781	4.786	0.9907	5.014	0.9471	5.024	0.9548	3.28	0.9331
625.01			4.735	0.938	4.814	0.9436	4.932	0.9337	4.694	0.9893	4.77	0.9874	5.066	0.9569	5.04	0.9578	3.28	0.9331
625.19			4.739	0.9388	4.834	0.9475	4.92	0.9315	4.747	1.0004	4.675	0.9677	5.036	0.9513	5.072	0.9639	3.256	0.9263
625.38			4.776	0.9461	4.828	0.9463	4.945	0.9362	4.726	0.996	4.713	0.9756	5.066	0.9569	5.067	0.9629	3.26	0.9275
625.57			4.776	0.9461	4.796	0.94	4.926	0.9326	4.712	0.993	4.724	0.9779	5.035	0.9511	5.063	0.9622	3.3	0.9388
625.76			4.85	0.9608	4.819	0.9445	4.993	0.9453	4.783	1.008	4.756	0.9845	5.033	0.9507	5.048	0.9593	3.272	0.9309
625.95			4.859	0.9626	4.86	0.9526	5.07	0.9599	4.789	1.0093	4.783	0.9901	4.997	0.9439	5.034	0.9567	3.286	0.9349
626.14			4.835	0.9578	4.803	0.9414	5.009	0.9483	4.722	0.9952	4.838	1.0014	5.046	0.9532	5.101	0.9694	3.271	0.9306
626.33			4.928	0.9762	4.839	0.9485	5.102	0.9659	4.771	1.0055	4.821	0.9979	5.032	0.9505	5.113	0.9717	3.288	0.9354
626.52			5.023	0.995	4.865	0.9535	5.16	0.9769	4.797	1.011	4.87	1.0081	5.005	0.9454	5.161	0.9808	3.322	0.9451
626.71			4.997	0.9899	4.857	0.952	5.18	0.9807	4.833	1.0185	4.856	1.0052	4.981	0.9409	5.148	0.9783	3.272	0.9309
626.9			5.003	0.9911	4.919	0.9641	5.245	0.993	4.836	1.0192	4.895	1.0132	4.973	0.9394	5.138	0.9764	3.266	0.9292
627.09			4.948	0.9802	4.912	0.9628	5.195	0.9835	4.798	1.0112	4.937	1.0219	5.008	0.946	5.186	0.9856	3.257	0.9266
627.28			4.905	0.9717	4.882	0.9569	5.167	0.9782	4.741	0.9992	5.045	1.0443	5.065	0.9567	5.195	0.9873	3.329	0.9471
627.46			4.876	0.9659	4.898	0.96	5.164	0.9777	4.779	1.0072	5.033	1.0418	5.129	0.9688	5.221	0.9922	3.313	0.9425
627.65			4.857	0.9622	4.908	0.962	5.157	0.9763	4.787	1.0089	5.027	1.0406	5.176	0.9777	5.216	0.9913	3.306	0.9405
627.84			4.796	0.9501	4.901	0.9606	5.088	0.9633	4.74	0.9989	5.034	1.042	5.22	0.986	5.244	0.9966	3.351	0.9533
628.03			4.761	0.9431	4.842	0.949	5.029	0.9521	4.74	0.9989	4.998	1.0346	5.208	0.9838	5.23	0.9939	3.301	0.9391
628.22			4.784	0.9477	4.907	0.9618	5.076	0.961	4.769	1.0051	4.949	1.0244	5.252	0.9921	5.221	0.9922	3.316	0.9434
628.41			4.806	0.9521	4.954	0.971	5.064	0.9587	4.791	1.0097	4.903	1.0149	5.243	0.9904	5.234	0.9947	3.361	0.9562
628.6			4.79	0.9489	4.968	0.9737	4.993	0.9453	4.779	1.0072	4.83	0.9998	5.237	0.9892	5.162	0.981	3.317	0.9437
628.79			4.844	0.9596	4.976	0.9753	4.967	0.9404	4.746	1.0002	4.81	0.9957	5.288	0.9989	5.199	0.988	3.411	0.9704
628.98			4.867	0.9641	4.99	0.978	4.966	0.9402	4.784	1.0082	4.821	0.9979	5.294	1	5.21	0.9901	3.406	0.969
629.17			4.83	0.9568	4.952	0.9706	4.993	0.9453	4.789	1.0093	4.798	0.9932	5.291	0.9994	5.141	0.977	3.369	0.9585
629.36			4.877	0.9661	4.985	0.9771	4.988	0.9443	4.846	1.0213	4.738	0.9807	5.254	0.9924	5.13	0.9749	3.275	0.9317
629.54			4.88	0.9667	4.992	0.9784	4.985	0.9438	4.855	1.0232	4.784	0.9903	5.251	0.9919	5.203	0.9888	3.31	0.9417
629.73			4.908	0.9723	4.978	0.9757	4.99	0.9447	4.885	1.0295	4.75	0.9832	5.224	0.9868	5.14	0.9768	3.279	0.9329
629.92			4.941	0.9788	5.011	0.9822	5.068	0.9595	4.854	1.023	4.712	0.9754	5.149	0.9726	5.136	0.9761	3.23	0.9189
630.11			5.022	0.9948	5.044	0.9886	5.073	0.9604	4.917	1.0362	4.72	0.977	5.149	0.9726	5.184	0.9852	3.273	0.9312
630.3			5.024	0.9952	5.034	0.9867	5.089	0.9635	4.917	1.0362	4.765	0.9863	5.138	0.9705	5.149	0.9785	3.3	0.9388
630.49			4.959	0.9824	4.984	0.9769	5.081	0.9619	4.865	1.0253	4.823	0.9983	5.225	0.987	5.145	0.9778	3.336	0.9491
630.68			4.896	0.9699	4.917	0.9637	5.082	0.9621	4.869	1.0261	4.897	1.0137	5.227	0.9873	5.162	0.981	3.344	0.9514
630.87			4.835	0.9578	4.856	0.9518	5.095	0.9646	4.877	1.0278	4.936	1.0217	5.225	0.987	5.114	0.9719	3.276	0.932
631.06			4.812	0.9532	4.856	0.9518	5.074	0.9606	4.797	1.011	4.854	1.0048	5.241	0.99	5.069	0.9633	3.263	0.9283
631.24			4.842	0.9592	4.853	0.9512	5.09	0.9637	4.832	1.0183	4.873	1.0087	5.211	0.9843	5.136	0.9761	3.352	0.9536
631.43			4.812	0.9532	4.847	0.95	5.133	0.9718	4.81	1.0137	4.893	1.0128	5.23	0.9879	5.138	0.9764	3.325	0.9459
631.62			4.805	0.9519	4.866	0.9537	5.117	0.9688	4.756	1.0023	4.78	0.9894	5.179	0.9783	5.047	0.9591	3.293	0.9368
631.81			4.788	0.9485	4.885	0.9575	5.155	0.976	4.713	0.9933	4.88	1.0101	5.202	0.9826	5.081	0.9656	3.285	0.9346
632			4.806	0.9521	4.903	0.961	5.147	0.9744	4.768	1.0048	4.972	1.0292	5.25	0.9917	5.113	0.9717	3.318	0.944
632.19			4.792	0.9493	4.921	0.9645	5.196	0.9837	4.79	1.0095	4.993	1.0335	5.3	1.0011	5.1	0.9692	3.393	0.9653
632.38			4.784	0.9477	4.92	0.9643	5.193	0.9832	4.8	1.0116	4.956	1.0259	5.311	1.0032	5.105	0.9702	3.394	0.9656
632.57			4.818	0.9544	4.953	0.9708	5.183	0.9813	4.78	1.0074	4.928	1.0201	5.23	0.9879	5.087	0.9667	3.314	0.9428
632.76			4.854	0.9616	5.024	0.9847	5.187	0.982	4.771	1.0055	4.918	1.018	5.314	1.0038	5.168	0.9821	3.379	0.9613
632.94			4.921	0.9748	5.114	1.0024	5.165	0.9778	4.786	1.0086	4.869	1.0079	5.272	0.9958	5.168	0.9821	3.37	0.9587
633.13			4.94	0.9786	5.08	0.9957	5.177	0.9801	4.795	1.0105	4.944	1.0234	5.268	0.9951	5.215	0.9911	3.432	0.9764
633.32			4.978	0.9861	5.102	1	5.17	0.9788	4.814	1.0145	4.967	1.0282	5.279	0.9972	5.16	0.9806	3.405	0.9687
633.51			4.974	0.9853	5.102	1	5.12	0.9693	4.818	1.0154	4.955	1.0257	5.276	0.9966	5.182	0.9848	3.43	0.9758
633.7			4.992	0.9889	5.093	0.9982	5.137	0.9725	4.821	1.016	5.037	1.0426	5.326	1.006	5.224	0.9928	3.423	0.9738
633.89			4.992	0.9889	5.115	1.0025	5.124	0.9701	4.879	1.0282	4.95	1.0246	5.341	1.0089	5.239	0.9956	3.44	0.9787
634.08			4.911	0.9729	5.018	0.9835	5.066	0.9591	4.843	1.0207	4.907	1.0157	5.38	1.0162	5.235	0.9949	3.453	0.9824
634.26			4.888	0.9683	4.986	0.9773	5.066	0.9591	4.801	1.0118	4.929	1.0203	5.399	1.0198	5.255	0.9987	3.415	0.9716
634.45			4.958	0.9822	4.994	0.9788	5.072	0.9602	4.835	1.019	4.942	1.023	5.351	1.0108	5.267	1.001	3.338	0.9496
634.64			4.98	0.9865	4.999	0.9798	5.106	0.9667	4.915	1.0358	4.887	1.0116	5.327	1.0062	5.241	0.996	3.374	0.9599
634.83			4.982	0.9869	4.972	0.9745	5.127	0.9707	4.929	1.0388	4.895	1.0132	5.28	0.9974	5.21	0.9901	3.329	0.9471
635.02			4.971	0.9847	4.946	0.9694	5.136	0.9724	4.943	1.0417	4.919	1.0182	5.312	1.0034	5.211	0.9903	3.352	0.9536
635.21			4.983	0.9871	5.013	0.9826	5.197	0.9839	5.054	1.0651	4.887	1.0116	5.23	0.9879	5.127	0.9743	3.28	0.9331
635.4			4.952	0.981	4.975	0.9751	5.155	0.976	4.965	1.0464	4.861	1.0062	5.232	0.9883	5.179	0.9842	3.306	0.9405
635.58			4.989	0.9883	5	0.98	5.195	0.9835	5.035	1.0611	4.901	1.0145	5.262	0.994	5.217	0.9914	3.389	0.9642
635.77			4.982	0.9869	5.004	0.9808	5.211	0.9866	5.06	1.0664	4.887	1.0116	5.282	0.9977	5.23	0.9939	3.432	0.9764
635.96			5.057	1.0018	5.058	0.9914	5.207	0.9858	5.063	1.067	4.915	1.0174	5.232	0.9883	5.3	1.0072	3.406	0.969
636.15			5.088	1.0079	5.1	0.9996	5.189	0.9824	5.041	1.0624	4.913	1.017	5.258	0.9932	5.253	0.9983	3.405	0.9687
636.34			5.093	1.0089	5.114	1.0024	5.17	0.9788	5.014	1.0567	4.9	1.0143	5.236	0.989	5.236	0.9951	3.422	0.9735
636.53			5.074	1.0052	5.131	1.0057	5.209	0.9862	5.035	1.0611	4.895	1.0132	5.295	1.0002	5.206	0.9894	3.422	0.9735
636.72			5.017	0.9939	5.157	1.0108	5.235	0.9911	5	1.0537	4.914	1.0172	5.326	1.006	5.238	0.9954	3.403	0.9681
636.9			5.025	0.9954	5.201	1.0194	5.266	0.997	4.99	1.0516	4.945	1.0236	5.34	1.0087	5.279	1.0032	3.461	0.9846
637.09			5.022	0.9948	5.202	1.0196	5.313	1.0059	5.004	1.0546	5.026	1.0404	5.335	1.0077	5.327	1.0124	3.53	1.0043
637.28			5.026	0.9956	5.238	1.0267	5.288	1.0011	4.97	1.0474	4.997	1.0344	5.453	1.03	5.383	1.023	3.6	1.0242
637.47			5.031	0.9966	5.272	1.0333	5.349	1.0127	5.016	1.0571	5.041	1.0435	5.456	1.0306	5.367	1.02	3.681	1.0472
637.66			4.987	0.9879	5.275	1.0339	5.305	1.0044	4.92	1.0369	5.04	1.0433	5.354	1.0113	5.319	1.0108	3.654	1.0395
637.85			4.998	0.9901	5.296	1.038	5.303	1.004	4.902	1.0331	5.032	1.0416	5.229	0.9877	5.248	0.9973	3.549	1.0097
638.03			4.924	0.9754	5.219	1.0229	5.28	0.9996	4.893	1.0312	5.061	1.0476	5.255	0.9926	5.24	0.9958	3.611	1.0273
638.22			4.947	0.98	5.184	1.0161	5.313	1.0059	4.917	1.0362	5.103	1.0563	5.229	0.9877	5.277	1.0029	3.618	1.0293
638.41			4.973	0.9851	5.262	1.0314	5.334	1.0098	4.979	1.0493	5.133	1.0625	5.255	0.9926	5.32	1.011	3.6	1.0242
638.6			4.956	0.9818	5.229	1.0249	5.263	0.9964	4.927	1.0384	5.143	1.0646	5.206	0.9834	5.4	1.0262	3.704	1.0538
638.79			4.968	0.9842	5.134	1.0063	5.175	0.9797	4.927	1.0384	5.15	1.066	5.22	0.986	5.43	1.0319	3.739	1.0637
638.98			4.949	0.9804	5.137	1.0069	5.173	0.9794	4.873	1.027	5.109	1.0575	5.154	0.9736	5.302	1.0076	3.636	1.0344
639.16			4.868	0.9643	5.129	1.0053	5.137	0.9725	4.866	1.0255	5.085	1.0526	5.204	0.983	5.296	1.0065	3.615	1.0284
639.35			4.87	0.9647	5.082	0.9961	5.134	0.972	4.856	1.0234	5.147	1.0654	5.152	0.9732	5.28	1.0034	3.556	1.0117
639.54			4.909	0.9725	5.131	1.0057	5.156	0.9761	4.84	1.02	5.143	1.0646	5.137	0.9703	5.317	1.0105	3.472	0.9878
639.73			4.979	0.9863	5.092	0.998	5.209	0.9862	4.88	1.0285	5.156	1.0673	5.204	0.983	5.353	1.0173	3.456	0.9832
639.92			4.926	0.9758	5.044	0.9886	5.211	0.9866	4.864	1.0251	5.193	1.0749	5.298	1.0008	5.457	1.0371	3.59	1.0213
640.11			4.975	0.9855	5.102	1	5.242	0.9924	4.928	1.0386	5.159	1.0679	5.31	1.003	5.401	1.0264	3.549	1.0097
640.29			5.024	0.9952	5.155	1.0104	5.286	1.0008	4.993	1.0523	5.11	1.0578	5.274	0.9962	5.472	1.0399	3.596	1.023
640.48			5.007	0.9919	5.108	1.0012	5.285	1.0006	4.976	1.0487	5.066	1.0486	5.211	0.9843	5.467	1.039	3.617	1.029
640.67			4.969	0.9844	5.06	0.9918	5.272	0.9981	4.968	1.047	5.13	1.0619	5.272	0.9958	5.459	1.0374	3.587	1.0205
640.86			4.941	0.9788	5.076	0.9949	5.369	1.0165	4.981	1.0497	5.16	1.0681	5.299	1.0009	5.469	1.0393	3.615	1.0284
641.05			4.876	0.9659	4.997	0.9794	5.323	1.0078	5.043	1.0628	5.16	1.0681	5.384	1.017	5.598	1.0639	3.719	1.058
641.24			4.956	0.9818	5.05	0.9898	5.304	1.0042	4.985	1.0506	5.155	1.0671	5.359	1.0123	5.634	1.0707	3.734	1.0623
641.42			4.978	0.9861	4.996	0.9792	5.275	0.9987	4.96	1.0453	5.201	1.0766	5.383	1.0168	5.665	1.0766	3.781	1.0757
641.61			4.982	0.9869	5.003	0.9806	5.29	1.0015	5.031	1.0603	5.169	1.07	5.404	1.0208	5.613	1.0667	3.754	1.068
641.8			5.041	0.9986	5.041	0.988	5.37	1.0167	5.139	1.083	5.159	1.0679	5.481	1.0353	5.636	1.0711	3.759	1.0694
641.99			5.101	1.0105	5.077	0.9951	5.359	1.0146	5.212	1.0984	5.125	1.0609	5.479	1.0349	5.535	1.0519	3.747	1.066
642.18			4.994	0.9893	5.021	0.9841	5.284	1.0004	5.128	1.0807	5.12	1.0598	5.51	1.0408	5.543	1.0534	3.762	1.0703
642.36			4.893	0.9693	4.977	0.9755	5.24	0.992	5.037	1.0615	5.107	1.0571	5.512	1.0412	5.375	1.0215	3.698	1.0521
642.55			4.896	0.9699	4.965	0.9731	5.278	0.9992	5.051	1.0645	5.123	1.0604	5.502	1.0393	5.381	1.0226	3.695	1.0512
642.74			4.903	0.9713	5.085	0.9967	5.366	1.0159	5.097	1.0742	5.114	1.0586	5.502	1.0393	5.366	1.0198	3.686	1.0486
642.93			4.97	0.9845	5.131	1.0057	5.334	1.0098	5.118	1.0786	4.993	1.0335	5.426	1.0249	5.366	1.0198	3.567	1.0148
643.12			4.987	0.9879	5.134	1.0063	5.338	1.0106	5.075	1.0695	5.022	1.0395	5.413	1.0225	5.343	1.0154	3.499	0.9954
643.3			4.976	0.9857	5.096	0.9988	5.389	1.0203	5.143	1.0839	4.998	1.0346	5.391	1.0183	5.262	1	3.443	0.9795
643.49			5	0.9905	5.209	1.021	5.471	1.0358	5.162	1.0879	4.964	1.0275	5.417	1.0232	5.224	0.9928	3.446	0.9804
643.68			4.948	0.9802	5.123	1.0041	5.409	1.024	5.073	1.0691	4.973	1.0294	5.42	1.0238	5.199	0.988	3.437	0.9778
643.87			4.916	0.9739	5.135	1.0065	5.403	1.0229	5.008	1.0554	5.057	1.0468	5.346	1.0098	5.161	0.9808	3.464	0.9855
644.06			4.876	0.9659	5.113	1.0022	5.39	1.0204	4.94	1.0411	5.064	1.0482	5.293	0.9998	5.185	0.9854	3.355	0.9545
644.24			4.964	0.9834	5.126	1.0047	5.474	1.0363	4.964	1.0462	5.107	1.0571	5.294	1	5.218	0.9916	3.368	0.9582
644.43			4.988	0.9881	5.179	1.0151	5.422	1.0265	4.989	1.0514	5.122	1.0602	5.318	1.0045	5.313	1.0097	3.41	0.9701
644.62			5.037	0.9978	5.205	1.0202	5.344	1.0117	4.945	1.0421	5.073	1.0501	5.329	1.0066	5.272	1.0019	3.372	0.9593
644.81			5.091	1.0085	5.224	1.0239	5.274	0.9985	4.937	1.0405	4.973	1.0294	5.308	1.0026	5.224	0.9928	3.326	0.9462
645			5.028	0.996	5.232	1.0255	5.252	0.9943	4.966	1.0466	5.075	1.0505	5.332	1.0072	5.141	0.977	3.354	0.9542
645.18			5.021	0.9947	5.248	1.0286	5.269	0.9975	4.941	1.0413	5.057	1.0468	5.323	1.0055	5.189	0.9861	3.392	0.965
645.37			5.118	1.0139	5.315	1.0417	5.372	1.017	4.95	1.0432	5.051	1.0455	5.375	1.0153	5.27	1.0015	3.436	0.9775
645.56			5.098	1.0099	5.271	1.0331	5.315	1.0062	5.006	1.055	5.023	1.0397	5.355	1.0115	5.248	0.9973	3.421	0.9733
645.75			5.046	0.9996	5.272	1.0333	5.228	0.9898	4.968	1.047	5.028	1.0408	5.418	1.0234	5.379	1.0222	3.518	1.0009
645.94			5.067	1.0038	5.319	1.0425	5.25	0.9939	4.938	1.0407	5	1.035	5.479	1.0349	5.428	1.0315	3.504	0.9969
646.12			5.147	1.0196	5.362	1.051	5.285	1.0006	5.012	1.0563	4.935	1.0215	5.515	1.0417	5.412	1.0285	3.54	1.0071
646.31			5.146	1.0194	5.322	1.0431	5.332	1.0095	4.977	1.0489	4.933	1.0211	5.549	1.0482	5.405	1.0272	3.58	1.0185
646.5			5.135	1.0172	5.311	1.041	5.361	1.015	4.983	1.0502	4.966	1.0279	5.581	1.0542	5.463	1.0382	3.54	1.0071
646.69			5.1	1.0103	5.301	1.039	5.332	1.0095	4.998	1.0533	5.021	1.0393	5.572	1.0525	5.499	1.045	3.571	1.0159
646.87			5.119	1.0141	5.248	1.0286	5.337	1.0104	5.004	1.0546	5.089	1.0534	5.57	1.0521	5.574	1.0593	3.573	1.0165
647.06			5.126	1.0155	5.245	1.028	5.349	1.0127	4.974	1.0483	5.137	1.0633	5.639	1.0652	5.657	1.0751	3.648	1.0378
647.25			5.244	1.0388	5.353	1.0492	5.399	1.0222	5.091	1.0729	5.139	1.0638	5.603	1.0584	5.627	1.0694	3.646	1.0373
647.44			5.174	1.025	5.265	1.0319	5.3	1.0034	5.07	1.0685	5.198	1.076	5.601	1.058	5.619	1.0678	3.659	1.041
647.62			5.134	1.017	5.24	1.027	5.246	0.9932	4.994	1.0525	5.249	1.0865	5.604	1.0586	5.64	1.0718	3.605	1.0256
647.81			5.19	1.0281	5.311	1.041	5.347	1.0123	5.067	1.0679	5.216	1.0797	5.554	1.0491	5.602	1.0646	3.578	1.0179
648			5.097	1.0097	5.256	1.0302	5.283	1.0002	5.066	1.0677	5.201	1.0766	5.527	1.044	5.566	1.0578	3.591	1.0216
648.19			5.057	1.0018	5.174	1.0141	5.26	0.9958	5.015	1.0569	5.291	1.0952	5.527	1.044	5.644	1.0726	3.626	1.0316
648.38			5.051	1.0006	5.27	1.0329	5.259	0.9956	5.096	1.074	5.255	1.0878	5.46	1.0314	5.626	1.0692	3.517	1.0006
648.56			5.069	1.0042	5.273	1.0335	5.272	0.9981	5.1	1.0748	5.276	1.0921	5.456	1.0306	5.597	1.0637	3.54	1.0071
648.75			5.107	1.0117	5.208	1.0208	5.345	1.0119	5.088	1.0723	5.299	1.0969	5.545	1.0474	5.631	1.0701	3.591	1.0216
648.94			5.028	0.996	5.186	1.0165	5.439	1.0297	5.103	1.0754	5.291	1.0952	5.511	1.041	5.608	1.0658	3.638	1.035
649.13			5.042	0.9988	5.203	1.0198	5.436	1.0292	5.067	1.0679	5.38	1.1136	5.461	1.0315	5.584	1.0612	3.653	1.0393
649.31			4.916	0.9739	5.122	1.0039	5.398	1.022	5.087	1.0721	5.394	1.1165	5.509	1.0406	5.592	1.0627	3.667	1.0432
649.5			4.864	0.9635	5.066	0.9929	5.369	1.0165	5.107	1.0763	5.312	1.0996	5.45	1.0295	5.546	1.054	3.563	1.0137
649.69			4.909	0.9725	5.148	1.009	5.5	1.0413	5.161	1.0877	5.294	1.0958	5.484	1.0359	5.587	1.0618	3.57	1.0156
649.88			4.955	0.9816	5.184	1.0161	5.492	1.0398	5.257	1.1079	5.337	1.1047	5.464	1.0321	5.534	1.0517	3.574	1.0168
650.06			4.921	0.9748	5.206	1.0204	5.49	1.0394	5.28	1.1128	5.344	1.1062	5.487	1.0365	5.564	1.0574	3.591	1.0216
650.25			4.976	0.9857	5.223	1.0237	5.482	1.0379	5.278	1.1123	5.301	1.0973	5.49	1.037	5.502	1.0456	3.601	1.0245
650.44			4.914	0.9735	5.102	1	5.375	1.0176	5.178	1.0913	5.366	1.1107	5.505	1.0399	5.561	1.0568	3.69	1.0498
650.63			4.961	0.9828	5.089	0.9975	5.399	1.0222	5.242	1.1047	5.309	1.0989	5.41	1.0219	5.533	1.0515	3.646	1.0373
650.81			4.87	0.9647	5.153	1.01	5.379	1.0184	5.276	1.1119	5.248	1.0863	5.388	1.0178	5.456	1.0369	3.619	1.0296
651			4.956	0.9818	5.194	1.018	5.353	1.0134	5.267	1.11	5.204	1.0772	5.4	1.02	5.4	1.0262	3.617	1.029
651.19			4.913	0.9733	5.162	1.0118	5.341	1.0112	5.336	1.1246	5.034	1.042	5.418	1.0234	5.38	1.0224	3.565	1.0142
651.38			4.995	0.9895	5.179	1.0151	5.333	1.0097	5.237	1.1037	5.012	1.0375	5.454	1.0302	5.263	1.0002	3.482	0.9906
651.56			5.074	1.0052	5.25	1.029	5.356	1.014	5.25	1.1064	5.044	1.0441	5.487	1.0365	5.319	1.0108	3.576	1.0174
651.75			5.072	1.0048	5.214	1.022	5.289	1.0013	5.263	1.1092	5.027	1.0406	5.438	1.0272	5.348	1.0163	3.588	1.0208
651.94			5.062	1.0028	5.153	1.01	5.314	1.0061	5.212	1.0984	5.036	1.0424	5.469	1.0331	5.35	1.0167	3.618	1.0293
652.13			5.123	1.0149	5.17	1.0133	5.365	1.0157	5.229	1.102	5.042	1.0437	5.384	1.017	5.261	0.9998	3.546	1.0088
652.31			5.094	1.0091	5.235	1.0261	5.394	1.0212	5.271	1.1109	5.039	1.0431	5.38	1.0162	5.296	1.0065	3.521	1.0017
652.5			5.127	1.0156	5.285	1.0359	5.453	1.0324	5.288	1.1144	4.946	1.0238	5.317	1.0043	5.153	0.9793	3.451	0.9818
652.69			5.09	1.0083	5.332	1.0451	5.451	1.032	5.216	1.0993	4.971	1.029	5.306	1.0023	5.158	0.9802	3.436	0.9775
652.88			5.096	1.0095	5.241	1.0272	5.48	1.0375	5.253	1.1071	5.037	1.0426	5.336	1.0079	5.159	0.9804	3.405	0.9687
653.06			5.069	1.0042	5.23	1.0251	5.46	1.0337	5.303	1.1176	5.052	1.0457	5.374	1.0151	5.224	0.9928	3.37	0.9587
653.25			5.071	1.0046	5.186	1.0165	5.445	1.0309	5.288	1.1144	5.169	1.07	5.365	1.0134	5.272	1.0019	3.373	0.9596
653.44			5.025	0.9954	5.197	1.0186	5.428	1.0276	5.39	1.1359	5.205	1.0774	5.26	0.9936	5.336	1.0141	3.368	0.9582
653.62			4.982	0.9869	5.191	1.0174	5.416	1.0254	5.42	1.1423	5.232	1.083	5.227	0.9873	5.245	0.9968	3.401	0.9676
653.81			5.014	0.9933	5.188	1.0169	5.496	1.0405	5.432	1.1448	5.229	1.0824	5.189	0.9802	5.181	0.9846	3.425	0.9744
654			5.02	0.9945	5.199	1.019	5.493	1.0399	5.477	1.1543	5.195	1.0753	5.141	0.9711	5.234	0.9947	3.35	0.9531
654.19			5.04	0.9984	5.192	1.0176	5.471	1.0358	5.56	1.1718	5.139	1.0638	5.202	0.9826	5.291	1.0055	3.374	0.9599
654.37			4.957	0.982	5.062	0.9922	5.39	1.0204	5.462	1.1511	5.194	1.0751	5.257	0.993	5.313	1.0097	3.442	0.9792
654.56			4.996	0.9897	5.115	1.0025	5.462	1.0341	5.533	1.1661	5.293	1.0956	5.36	1.0125	5.422	1.0304	3.454	0.9826
654.75			5.095	1.0093	5.077	0.9951	5.499	1.0411	5.601	1.1804	5.321	1.1014	5.447	1.0289	5.462	1.038	3.512	0.9991
654.93			5.097	1.0097	5.071	0.9939	5.387	1.0199	5.508	1.1608	5.285	1.094	5.432	1.0261	5.537	1.0523	3.558	1.0122
655.12			5.095	1.0093	5.14	1.0074	5.408	1.0239	5.491	1.1572	5.309	1.0989	5.402	1.0204	5.479	1.0412	3.663	1.0421
655.31			5.133	1.0168	5.134	1.0063	5.492	1.0398	5.477	1.1543	5.238	1.0842	5.388	1.0178	5.438	1.0334	3.677	1.0461
655.5			5.117	1.0137	5.093	0.9982	5.519	1.0449	5.445	1.1475	5.2	1.0764	5.55	1.0484	5.454	1.0365	3.763	1.0706
655.68			5.15	1.0202	5.169	1.0131	5.571	1.0547	5.438	1.146	5.209	1.0782	5.589	1.0557	5.574	1.0593	3.77	1.0725
655.87			5.101	1.0105	5.164	1.0122	5.48	1.0375	5.343	1.126	5.136	1.0631	5.61	1.0597	5.505	1.0462	3.724	1.0595
656.06			5.096	1.0095	5.11	1.0016	5.46	1.0337	5.207	1.0974	5.12	1.0598	5.632	1.0638	5.354	1.0175	3.711	1.0558
656.24			5.071	1.0046	5.141	1.0076	5.41	1.0242	5.118	1.0786	5.127	1.0613	5.644	1.0661	5.303	1.0078	3.728	1.0606
656.43			5.175	1.0252	5.23	1.0251	5.519	1.0449	5.248	1.106	5.127	1.0613	5.659	1.0689	5.302	1.0076	3.707	1.0546
656.62			5.223	1.0347	5.299	1.0386	5.535	1.0479	5.325	1.1222	5.005	1.036	5.593	1.0565	5.369	1.0203	3.706	1.0543
656.81			5.146	1.0194	5.269	1.0327	5.44	1.0299	5.282	1.1132	5.013	1.0377	5.607	1.0591	5.341	1.015	3.725	1.0597
656.99			5.139	1.018	5.331	1.0449	5.519	1.0449	5.342	1.1258	5.019	1.0389	5.522	1.0431	5.262	1	3.675	1.0455
657.18			5.116	1.0135	5.268	1.0325	5.488	1.039	5.286	1.114	5.018	1.0387	5.492	1.0374	5.298	1.0068	3.602	1.0248
657.37			5.119	1.0141	5.321	1.0429	5.459	1.0335	5.307	1.1184	5.085	1.0526	5.503	1.0395	5.354	1.0175	3.615	1.0284
657.55			5.104	1.0111	5.317	1.0421	5.507	1.0426	5.326	1.1224	5.094	1.0544	5.41	1.0219	5.419	1.0298	3.562	1.0134
657.74			5.088	1.0079	5.252	1.0294	5.573	1.0551	5.316	1.1203	5.05	1.0453	5.448	1.0291	5.402	1.0266	3.519	1.0011
657.93			5.122	1.0147	5.19	1.0172	5.596	1.0594	5.413	1.1408	5.115	1.0588	5.487	1.0365	5.529	1.0507	3.596	1.023
658.11			5.112	1.0127	5.242	1.0274	5.628	1.0655	5.475	1.1538	5.188	1.0739	5.511	1.041	5.608	1.0658	3.645	1.037
658.3			5.138	1.0178	5.199	1.019	5.657	1.071	5.509	1.161	5.181	1.0724	5.532	1.045	5.713	1.0857	3.656	1.0401
658.49			5.058	1.002	5.204	1.02	5.576	1.0557	5.421	1.1425	5.121	1.06	5.499	1.0387	5.731	1.0891	3.608	1.0265
658.68			4.963	0.9832	5.089	0.9975	5.481	1.0377	5.319	1.121	5.212	1.0789	5.546	1.0476	5.658	1.0753	3.612	1.0276
658.86			4.961	0.9828	5.145	1.0084	5.646	1.0689	5.345	1.1264	5.187	1.0737	5.559	1.0501	5.677	1.0789	3.58	1.0185
659.05			5.029	0.9962	5.182	1.0157	5.712	1.0814	5.391	1.1361	5.224	1.0813	5.619	1.0614	5.71	1.0851	3.593	1.0222
659.24			5.053	1.001	5.114	1.0024	5.744	1.0875	5.438	1.146	5.214	1.0793	5.653	1.0678	5.706	1.0844	3.565	1.0142
659.42			5.047	0.9998	5.13	1.0055	5.741	1.0869	5.442	1.1469	5.173	1.0708	5.678	1.0725	5.703	1.0838	3.617	1.029
659.61			5.092	1.0087	5.12	1.0035	5.72	1.0829	5.435	1.1454	5.197	1.0758	5.688	1.0744	5.681	1.0796	3.686	1.0486
659.8			5.125	1.0153	5.174	1.0141	5.713	1.0816	5.448	1.1482	5.217	1.0799	5.636	1.0646	5.646	1.073	3.669	1.0438
659.98			5.082	1.0067	5.199	1.019	5.732	1.0852	5.431	1.1446	5.199	1.0762	5.622	1.062	5.625	1.069	3.656	1.0401
660.17			5.022	0.9948	5.175	1.0143	5.715	1.082	5.407	1.1395	5.183	1.0729	5.58	1.054	5.619	1.0678	3.66	1.0413
660.36			5.089	1.0081	5.207	1.0206	5.745	1.0877	5.423	1.1429	5.256	1.088	5.603	1.0584	5.622	1.0684	3.674	1.0452
660.54			5.089	1.0081	5.202	1.0196	5.807	1.0994	5.522	1.1638	5.316	1.1004	5.565	1.0512	5.561	1.0568	3.658	1.0407
660.73			5.135	1.0172	5.288	1.0365	5.853	1.1081	5.546	1.1688	5.279	1.0927	5.545	1.0474	5.6	1.0642	3.682	1.0475
660.92			5.111	1.0125	5.285	1.0359	5.707	1.0805	5.55	1.1697	5.262	1.0892	5.532	1.045	5.649	1.0735	3.697	1.0518
661.1			5.102	1.0107	5.308	1.0404	5.774	1.0931	5.474	1.1536	5.273	1.0915	5.574	1.0529	5.697	1.0827	3.735	1.0626
661.29			5.109	1.0121	5.37	1.0525	5.795	1.0971	5.441	1.1467	5.312	1.0996	5.649	1.0671	5.741	1.091	3.768	1.072
661.48			5.114	1.0131	5.328	1.0443	5.766	1.0916	5.453	1.1492	5.333	1.1039	5.653	1.0678	5.723	1.0876	3.64	1.0356
661.66			5.236	1.0372	5.341	1.0468	5.796	1.0973	5.475	1.1538	5.347	1.1068	5.677	1.0723	5.678	1.0791	3.575	1.0171
661.85			5.216	1.0333	5.302	1.0392	5.766	1.0916	5.484	1.1557	5.302	1.0975	5.689	1.0746	5.683	1.08	3.598	1.0236
662.04			5.21	1.0321	5.337	1.0461	5.811	1.1002	5.518	1.1629	5.348	1.107	5.708	1.0782	5.666	1.0768	3.532	1.0048
662.22			5.341	1.058	5.385	1.0555	5.901	1.1172	5.653	1.1914	5.35	1.1074	5.737	1.0837	5.685	1.0804	3.495	0.9943
662.41			5.291	1.0481	5.322	1.0431	5.917	1.1202	5.569	1.1737	5.272	1.0913	5.753	1.0867	5.654	1.0745	3.414	0.9713
662.6			5.295	1.0489	5.319	1.0425	5.931	1.1229	5.529	1.1652	5.309	1.0989	5.808	1.0971	5.675	1.0785	3.451	0.9818
662.78			5.323	1.0545	5.355	1.0496	5.945	1.1255	5.6	1.1802	5.347	1.1068	5.838	1.1028	5.618	1.0677	3.47	0.9872
662.97			5.427	1.0751	5.321	1.0429	5.987	1.1335	5.613	1.1829	5.344	1.1062	5.838	1.1028	5.553	1.0553	3.43	0.9758
663.16			5.453	1.0802	5.31	1.0408	5.838	1.1053	5.696	1.2004	5.306	1.0983	5.759	1.0878	5.519	1.0488	3.35	0.9531
663.34			5.501	1.0897	5.306	1.04	5.845	1.1066	5.746	1.211	5.344	1.1062	5.771	1.0901	5.561	1.0568	3.385	0.963
663.53			5.54	1.0975	5.358	1.0502	5.915	1.1198	5.728	1.2072	5.297	1.0965	5.749	1.0859	5.529	1.0507	3.466	0.9861
663.72			5.381	1.066	5.426	1.0635	5.891	1.1153	5.672	1.1954	5.264	1.0896	5.748	1.0858	5.496	1.0445	3.507	0.9977
663.9			5.396	1.0689	5.406	1.0596	5.844	1.1064	5.65	1.1907	5.313	1.0998	5.791	1.0939	5.501	1.0454	3.531	1.0046
664.09			5.404	1.0705	5.392	1.0568	5.77	1.0924	5.603	1.1808	5.229	1.0824	5.716	1.0797	5.481	1.0416	3.562	1.0134
664.28			5.373	1.0644	5.404	1.0592	5.664	1.0723	5.539	1.1673	5.184	1.0731	5.737	1.0837	5.478	1.041	3.523	1.0023
664.46			5.312	1.0523	5.438	1.0659	5.641	1.068	5.608	1.1819	5.19	1.0743	5.632	1.0638	5.39	1.0243	3.527	1.0034
664.65			5.351	1.06	5.409	1.0602	5.616	1.0632	5.619	1.1842	5.076	1.0507	5.605	1.0587	5.337	1.0143	3.485	0.9915
664.84			5.404	1.0705	5.27	1.0329	5.613	1.0627	5.573	1.1745	5.119	1.0596	5.579	1.0538	5.356	1.0179	3.464	0.9855
665.02			5.361	1.062	5.242	1.0274	5.639	1.0676	5.604	1.181	5.099	1.0555	5.493	1.0376	5.331	1.0131	3.476	0.9889
665.21			5.316	1.0531	5.187	1.0167	5.645	1.0687	5.582	1.1764	5.079	1.0513	5.469	1.0331	5.274	1.0023	3.438	0.9781
665.4			5.327	1.0553	5.211	1.0214	5.673	1.074	5.537	1.1669	5.013	1.0377	5.35	1.0106	5.223	0.9926	3.393	0.9653
665.58			5.319	1.0537	5.182	1.0157	5.573	1.0551	5.458	1.1503	5.063	1.048	5.321	1.0051	5.255	0.9987	3.38	0.9616
665.77			5.374	1.0646	5.138	1.0071	5.578	1.056	5.458	1.1503	5.052	1.0457	5.305	1.0021	5.257	0.999	3.338	0.9496
665.95			5.391	1.0679	5.134	1.0063	5.587	1.0577	5.506	1.1604	5.112	1.0582	5.283	0.9979	5.226	0.9932	3.308	0.9411
666.14			5.427	1.0751	5.134	1.0063	5.568	1.0541	5.488	1.1566	5.159	1.0679	5.308	1.0026	5.278	1.003	3.298	0.9383
666.33			5.393	1.0683	5.08	0.9957	5.65	1.0697	5.423	1.1429	5.146	1.0652	5.271	0.9957	5.298	1.0068	3.281	0.9334
666.51			5.444	1.0784	5.071	0.9939	5.587	1.0577	5.444	1.1473	5.187	1.0737	5.331	1.007	5.334	1.0137	3.281	0.9334
666.7			5.495	1.0885	5.091	0.9978	5.584	1.0572	5.446	1.1477	5.237	1.084	5.339	1.0085	5.416	1.0293	3.287	0.9351
666.89			5.443	1.0782	5.21	1.0212	5.615	1.063	5.478	1.1545	5.202	1.0768	5.352	1.011	5.454	1.0365	3.258	0.9269
667.07			5.384	1.0666	5.254	1.0298	5.619	1.0638	5.49	1.157	5.264	1.0896	5.412	1.0223	5.513	1.0477	3.294	0.9371
667.26			5.392	1.0681	5.273	1.0335	5.71	1.081	5.492	1.1574	5.26	1.0888	5.432	1.0261	5.557	1.0561	3.302	0.9394
667.45			5.334	1.0567	5.276	1.0341	5.599	1.06	5.517	1.1627	5.266	1.09	5.481	1.0353	5.523	1.0496	3.339	0.9499
667.63			5.306	1.0511	5.233	1.0257	5.627	1.0653	5.56	1.1718	5.262	1.0892	5.522	1.0431	5.527	1.0504	3.331	0.9477
667.82			5.248	1.0396	5.247	1.0284	5.576	1.0557	5.606	1.1815	5.339	1.1052	5.517	1.0421	5.511	1.0473	3.297	0.938
668			5.251	1.0402	5.314	1.0416	5.594	1.0591	5.524	1.1642	5.264	1.0896	5.518	1.0423	5.564	1.0574	3.279	0.9329
668.19			5.257	1.0414	5.307	1.0402	5.59	1.0583	5.53	1.1654	5.287	1.0944	5.583	1.0546	5.54	1.0528	3.346	0.9519
668.38			5.253	1.0406	5.358	1.0502	5.62	1.064	5.549	1.1694	5.332	1.1037	5.571	1.0523	5.523	1.0496	3.468	0.9866
668.56			5.253	1.0406	5.352	1.049	5.722	1.0833	5.519	1.1631	5.378	1.1132	5.546	1.0476	5.506	1.0464	3.543	1.008
668.75			5.217	1.0335	5.405	1.0594	5.784	1.095	5.529	1.1652	5.362	1.1099	5.555	1.0493	5.478	1.041	3.577	1.0176
668.93			5.122	1.0147	5.356	1.0498	5.793	1.0967	5.461	1.1509	5.349	1.1072	5.512	1.0412	5.454	1.0365	3.567	1.0148
669.12			5.231	1.0363	5.419	1.0621	5.819	1.1017	5.483	1.1555	5.285	1.094	5.445	1.0285	5.368	1.0201	3.471	0.9875
669.31			5.216	1.0333	5.395	1.0574	5.778	1.0939	5.439	1.1463	5.256	1.088	5.475	1.0342	5.371	1.0207	3.518	1.0009
669.49			5.136	1.0174	5.296	1.038	5.843	1.1062	5.301	1.1172	5.251	1.0869	5.48	1.0351	5.402	1.0266	3.461	0.9846
669.68			5.176	1.0254	5.36	1.0506	5.927	1.1221	5.322	1.1216	5.27	1.0909	5.493	1.0376	5.38	1.0224	3.434	0.977
669.87			5.272	1.0444	5.354	1.0494	6.002	1.1363	5.376	1.133	5.156	1.0673	5.425	1.0247	5.396	1.0255	3.46	0.9844
670.05			5.123	1.0149	5.297	1.0382	5.919	1.1206	5.366	1.1309	5.201	1.0766	5.415	1.0229	5.43	1.0319	3.434	0.977
670.24			4.979	0.9863	5.244	1.0278	5.908	1.1185	5.367	1.1311	5.18	1.0722	5.364	1.0132	5.405	1.0272	3.405	0.9687
670.42			4.875	0.9657	5.111	1.0018	5.823	1.1024	5.356	1.1288	5.227	1.082	5.364	1.0132	5.387	1.0238	3.297	0.938
670.61			4.822	0.9552	5.198	1.0188	5.814	1.1007	5.339	1.1252	5.232	1.083	5.443	1.0281	5.49	1.0433	3.259	0.9272
670.8			4.771	0.9451	5.126	1.0047	5.729	1.0846	5.299	1.1168	5.275	1.0919	5.416	1.023	5.487	1.0428	3.241	0.922
670.98			4.882	0.9671	5.064	0.9926	5.637	1.0672	5.262	1.109	5.24	1.0847	5.433	1.0263	5.484	1.0422	3.281	0.9334
671.17			4.826	0.956	5.041	0.988	5.66	1.0716	5.218	1.0997	5.296	1.0963	5.429	1.0255	5.519	1.0488	3.366	0.9576
671.35			4.862	0.9632	5.04	0.9878	5.651	1.0699	5.284	1.1136	5.398	1.1174	5.467	1.0327	5.527	1.0504	3.455	0.9829
671.54			4.906	0.9719	5.288	1.0365	5.731	1.085	5.424	1.1431	5.424	1.1227	5.419	1.0236	5.502	1.0456	3.437	0.9778
671.73			4.952	0.981	5.377	1.0539	5.716	1.0822	5.465	1.1517	5.456	1.1294	5.452	1.0298	5.601	1.0644	3.526	1.0031
671.91			4.876	0.9659	5.427	1.0637	5.755	1.0895	5.363	1.1302	5.514	1.1414	5.473	1.0338	5.674	1.0783	3.541	1.0074
672.1			5.01	0.9925	5.42	1.0623	5.833	1.1043	5.395	1.137	5.481	1.1345	5.414	1.0227	5.586	1.0616	3.593	1.0222
672.28			5.179	1.026	5.52	1.0819	5.99	1.134	5.445	1.1475	5.483	1.135	5.42	1.0238	5.621	1.0682	3.546	1.0088
672.47			5.337	1.0573	5.657	1.1088	6.08	1.1511	5.574	1.1747	5.394	1.1165	5.422	1.0242	5.663	1.0762	3.495	0.9943
672.66			5.374	1.0646	5.65	1.1074	6.029	1.1414	5.702	1.2017	5.342	1.1058	5.351	1.0108	5.618	1.0677	3.546	1.0088
672.84			5.373	1.0644	5.626	1.1027	6.111	1.1569	5.682	1.1975	5.339	1.1052	5.331	1.007	5.662	1.076	3.563	1.0137
673.03			5.262	1.0424	5.704	1.118	6.152	1.1647	5.769	1.2158	5.407	1.1192	5.429	1.0255	5.634	1.0707	3.671	1.0444
673.21			5.176	1.0254	5.709	1.119	6.079	1.1509	5.626	1.1857	5.364	1.1103	5.554	1.0491	5.616	1.0673	3.615	1.0284
673.4			5.21	1.0321	5.726	1.1223	6.159	1.166	5.639	1.1884	5.353	1.1081	5.533	1.0451	5.59	1.0623	3.541	1.0074
673.58			5.348	1.0594	5.56	1.0898	6.041	1.1437	5.658	1.1924	5.306	1.0983	5.587	1.0553	5.54	1.0528	3.584	1.0196
673.77			5.199	1.0299	5.477	1.0735	6.023	1.1403	5.687	1.1985	5.223	1.0811	5.501	1.0391	5.367	1.02	3.424	0.9741
673.96			5.302	1.0503	5.48	1.0741	5.961	1.1285	5.779	1.2179	5.207	1.0778	5.501	1.0391	5.335	1.0139	3.431	0.9761
674.14			5.189	1.0279	5.485	1.0751	5.922	1.1212	5.709	1.2032	5.222	1.0809	5.484	1.0359	5.334	1.0137	3.351	0.9533
674.33			5.214	1.0329	5.374	1.0533	5.788	1.0958	5.707	1.2027	5.295	1.096	5.452	1.0298	5.306	1.0084	3.339	0.9499
674.51			5.199	1.0299	5.297	1.0382	5.735	1.0858	5.615	1.1834	5.293	1.0956	5.446	1.0287	5.266	1.0008	3.466	0.9861
674.7			5.253	1.0406	5.246	1.0282	5.779	1.0941	5.457	1.1501	5.263	1.0894	5.405	1.021	5.22	0.992	3.375	0.9602
674.88			5.281	1.0462	5.337	1.0461	5.767	1.0918	5.526	1.1646	5.223	1.0811	5.403	1.0206	5.167	0.9819	3.358	0.9553
675.07			5.402	1.0701	5.317	1.0421	5.752	1.089	5.455	1.1496	5.18	1.0722	5.237	0.9892	5.173	0.9831	3.221	0.9164
675.26			5.493	1.0882	5.287	1.0363	5.768	1.092	5.61	1.1823	5.286	1.0942	5.232	0.9883	5.305	1.0082	3.308	0.9411
675.44			5.341	1.058	5.242	1.0274	5.662	1.0719	5.465	1.1517	5.275	1.0919	5.243	0.9904	5.368	1.0201	3.294	0.9371
675.63			5.247	1.0394	5.273	1.0335	5.765	1.0914	5.593	1.1787	5.297	1.0965	5.246	0.9909	5.497	1.0447	3.233	0.9198
675.81			5.314	1.0527	5.287	1.0363	5.762	1.0909	5.524	1.1642	5.445	1.1271	5.338	1.0083	5.658	1.0753	3.373	0.9596
676			5.226	1.0353	5.174	1.0141	5.763	1.0911	5.413	1.1408	5.486	1.1356	5.38	1.0162	5.63	1.0699	3.296	0.9377
676.18			5.349	1.0596	5.221	1.0233	5.819	1.1017	5.491	1.1572	5.447	1.1275	5.497	1.0383	5.608	1.0658	3.316	0.9434
676.37			5.291	1.0481	5.271	1.0331	5.856	1.1087	5.445	1.1475	5.367	1.111	5.542	1.0468	5.601	1.0644	3.374	0.9599
676.56			5.321	1.0541	5.272	1.0333	5.778	1.0939	5.423	1.1429	5.433	1.1246	5.603	1.0584	5.675	1.0785	3.404	0.9684
676.74			5.227	1.0355	5.321	1.0429	5.747	1.088	5.511	1.1614	5.495	1.1374	5.597	1.0572	5.737	1.0903	3.351	0.9533
676.93			5.29	1.0479	5.262	1.0314	5.817	1.1013	5.59	1.1781	5.521	1.1428	5.626	1.0627	5.825	1.107	3.342	0.9508
677.11			5.223	1.0347	5.235	1.0261	5.895	1.1161	5.663	1.1935	5.45	1.1281	5.622	1.062	5.755	1.0937	3.401	0.9676
677.3			5.247	1.0394	5.262	1.0314	5.908	1.1185	5.588	1.1777	5.388	1.1153	5.534	1.0453	5.605	1.0652	3.356	0.9548
677.48			5.382	1.0662	5.37	1.0525	5.974	1.131	5.768	1.2156	5.352	1.1078	5.483	1.0357	5.567	1.058	3.311	0.942
677.67			5.357	1.0612	5.383	1.0551	5.94	1.1246	5.615	1.1834	5.285	1.094	5.403	1.0206	5.452	1.0361	3.388	0.9639
677.85			5.302	1.0503	5.325	1.0437	5.878	1.1128	5.553	1.1703	5.153	1.0667	5.312	1.0034	5.366	1.0198	3.368	0.9582
678.04			5.282	1.0464	5.391	1.0566	5.869	1.1111	5.631	1.1867	5.152	1.0664	5.311	1.0032	5.421	1.0302	3.44	0.9787
678.23			5.388	1.0674	5.459	1.07	5.981	1.1323	5.713	1.204	5.188	1.0739	5.304	1.0019	5.54	1.0528	3.476	0.9889
678.41			5.428	1.0753	5.515	1.0809	5.996	1.1352	5.792	1.2207	5.323	1.1018	5.421	1.024	5.604	1.065	3.471	0.9875
678.6			5.428	1.0753	5.661	1.1096	6.103	1.1554	5.822	1.227	5.256	1.088	5.386	1.0174	5.547	1.0542	3.421	0.9733
678.78			5.544	1.0983	5.616	1.1007	6.129	1.1604	5.832	1.2291	5.225	1.0816	5.451	1.0297	5.489	1.0431	3.538	1.0065
678.97			5.58	1.1054	5.617	1.1009	6.049	1.1452	5.732	1.208	5.174	1.071	5.553	1.0489	5.498	1.0448	3.647	1.0376
679.15			5.578	1.105	5.614	1.1004	6.047	1.1448	5.714	1.2042	5.201	1.0766	5.645	1.0663	5.613	1.0667	3.65	1.0384
679.34			5.512	1.0919	5.514	1.0808	6.042	1.1439	5.721	1.2057	5.257	1.0882	5.8	1.0956	5.74	1.0908	3.685	1.0484
679.52			5.383	1.0664	5.374	1.0533	5.962	1.1287	5.6	1.1802	5.244	1.0855	5.874	1.1096	5.726	1.0882	3.725	1.0597
679.71			5.429	1.0755	5.38	1.0545	5.961	1.1285	5.599	1.18	5.392	1.1161	5.998	1.133	5.833	1.1085	3.712	1.056
679.89			5.499	1.0893	5.431	1.0645	6.025	1.1407	5.631	1.1867	5.43	1.124	6.025	1.1381	5.819	1.1059	3.682	1.0475
680.08			5.538	1.0971	5.444	1.067	6.077	1.1505	5.678	1.1966	5.479	1.1341	6.049	1.1426	5.871	1.1157	3.73	1.0612
680.26			5.438	1.0773	5.396	1.0576	5.965	1.1293	5.593	1.1787	5.566	1.1521	6.121	1.1562	5.861	1.1138	3.729	1.0609
680.45			5.374	1.0646	5.372	1.0529	5.964	1.1291	5.563	1.1724	5.544	1.1476	6.139	1.1596	5.872	1.1159	3.807	1.0831
680.64			5.361	1.062	5.373	1.0531	5.935	1.1236	5.61	1.1823	5.558	1.1505	6.162	1.164	5.931	1.1271	3.819	1.0865
680.82			5.238	1.0376	5.304	1.0396	5.867	1.1108	5.555	1.1707	5.614	1.1621	6.202	1.1715	5.895	1.1203	3.82	1.0868
681.01			5.172	1.0246	5.301	1.039	5.903	1.1176	5.586	1.1772	5.629	1.1652	6.087	1.1498	5.819	1.1059	3.771	1.0728
681.19			5.165	1.0232	5.318	1.0423	5.844	1.1064	5.597	1.1796	5.674	1.1745	6.138	1.1594	5.88	1.1174	3.82	1.0868
681.38			5.305	1.0509	5.489	1.0759	5.924	1.1215	5.692	1.1996	5.574	1.1538	6	1.1334	5.828	1.1076	3.79	1.0782
681.56			5.369	1.0636	5.527	1.0833	5.929	1.1225	5.791	1.2204	5.593	1.1577	6.02	1.1371	5.866	1.1148	3.829	1.0893
681.75			5.254	1.0408	5.487	1.0755	5.887	1.1145	5.764	1.2148	5.449	1.1279	5.885	1.1116	5.804	1.103	3.808	1.0834
681.93			5.312	1.0523	5.524	1.0827	5.965	1.1293	5.86	1.235	5.432	1.1244	5.914	1.1171	5.848	1.1114	3.941	1.1212
682.12			5.269	1.0438	5.533	1.0845	5.969	1.1301	5.829	1.2285	5.403	1.1184	5.926	1.1194	5.793	1.1009	3.903	1.1104
682.3			5.245	1.039	5.563	1.0904	5.997	1.1354	5.812	1.2249	5.284	1.0938	5.826	1.1005	5.796	1.1015	3.906	1.1112
682.49			5.341	1.058	5.556	1.089	6.007	1.1373	5.787	1.2196	5.174	1.071	5.701	1.0769	5.758	1.0943	3.778	1.0748
682.67			5.378	1.0654	5.561	1.09	5.991	1.1342	5.829	1.2285	5.276	1.0921	5.684	1.0737	5.687	1.0808	3.73	1.0612
682.86			5.495	1.0885	5.672	1.1117	6.099	1.1547	5.811	1.2247	5.262	1.0892	5.608	1.0593	5.753	1.0933	3.734	1.0623
683.04			5.503	1.0901	5.759	1.1288	6.15	1.1643	5.813	1.2251	5.385	1.1147	5.736	1.0835	5.842	1.1102	3.74	1.064
683.23			5.571	1.1036	5.867	1.1499	6.211	1.1759	5.864	1.2358	5.42	1.1219	5.696	1.0759	5.777	1.0979	3.63	1.0327
683.41			5.493	1.0882	5.795	1.1358	6.136	1.1617	5.8	1.2223	5.405	1.1188	5.737	1.0837	5.772	1.0969	3.595	1.0228
683.6			5.517	1.0929	5.849	1.1464	6.137	1.1619	5.727	1.207	5.406	1.119	5.623	1.0621	5.75	1.0927	3.578	1.0179
683.78			5.574	1.1042	5.797	1.1362	6.124	1.1594	5.732	1.208	5.466	1.1314	5.772	1.0903	5.797	1.1017	3.597	1.0233
683.97			5.445	1.0786	5.814	1.1396	6.045	1.1445	5.639	1.1884	5.45	1.1281	5.78	1.0918	5.833	1.1085	3.463	0.9852
684.15			5.456	1.0808	5.734	1.1239	6.037	1.1429	5.626	1.1857	5.391	1.1159	5.75	1.0861	5.857	1.1131	3.485	0.9915
684.34			5.428	1.0753	5.665	1.1103	5.978	1.1318	5.621	1.1846	5.43	1.124	5.8	1.0956	5.852	1.1121	3.451	0.9818
684.52			5.373	1.0644	5.666	1.1105	5.986	1.1333	5.604	1.181	5.591	1.1573	5.842	1.1035	5.907	1.1226	3.568	1.0151
684.71			5.335	1.0569	5.567	1.0911	5.953	1.127	5.419	1.142	5.541	1.147	5.88	1.1107	5.885	1.1184	3.619	1.0296
684.89			5.317	1.0533	5.572	1.0921	5.889	1.1149	5.461	1.1509	5.529	1.1445	5.818	1.099	5.841	1.11	3.576	1.0174
685.08			5.358	1.0614	5.529	1.0837	5.769	1.0922	5.442	1.1469	5.528	1.1443	5.694	1.0756	5.837	1.1093	3.543	1.008
685.26			5.271	1.0442	5.402	1.0588	5.668	1.0731	5.356	1.1288	5.452	1.1285	5.613	1.0603	5.804	1.103	3.572	1.0162
685.45			5.219	1.0339	5.444	1.067	5.605	1.0612	5.289	1.1146	5.581	1.1552	5.562	1.0506	5.736	1.0901	3.569	1.0154
685.63			5.217	1.0335	5.499	1.0778	5.689	1.0771	5.3	1.117	5.672	1.1741	5.728	1.082	5.84	1.1098	3.644	1.0367
685.82			5.301	1.0501	5.478	1.0737	5.665	1.0725	5.422	1.1427	5.693	1.1784	5.61	1.0597	5.785	1.0994	3.545	1.0085
686			5.414	1.0725	5.422	1.0627	5.68	1.0754	5.492	1.1574	5.744	1.189	5.635	1.0644	5.754	1.0935	3.554	1.0111
686.19			5.44	1.0777	5.429	1.0641	5.577	1.0559	5.414	1.141	5.872	1.2155	5.633	1.064	5.687	1.0808	3.543	1.008
686.37			5.472	1.084	5.455	1.0692	5.651	1.0699	5.499	1.1589	5.817	1.2041	5.498	1.0385	5.572	1.0589	3.515	1
686.56			5.513	1.0921	5.534	1.0847	5.623	1.0646	5.505	1.1602	5.715	1.183	5.47	1.0332	5.503	1.0458	3.428	0.9752
686.74			5.499	1.0893	5.446	1.0674	5.618	1.0636	5.55	1.1697	5.678	1.1753	5.447	1.0289	5.427	1.0314	3.364	0.957
686.93			5.457	1.081	5.389	1.0563	5.584	1.0572	5.474	1.1536	5.689	1.1776	5.605	1.0587	5.384	1.0232	3.351	0.9533
687.11			5.489	1.0874	5.344	1.0474	5.619	1.0638	5.479	1.1547	5.62	1.1633	5.66	1.0691	5.326	1.0122	3.289	0.9357
687.3			5.547	1.0989	5.284	1.0357	5.673	1.074	5.446	1.1477	5.7	1.1799	5.797	1.095	5.399	1.026	3.33	0.9474
687.48			5.611	1.1115	5.263	1.0316	5.745	1.0877	5.528	1.165	5.507	1.1399	5.862	1.1073	5.45	1.0357	3.35	0.9531
687.67			5.734	1.1359	5.172	1.0137	5.695	1.0782	5.523	1.164	5.427	1.1234	5.701	1.0769	5.32	1.011	3.175	0.9033
687.85			5.685	1.1262	5.293	1.0374	5.735	1.0858	5.5	1.1591	5.366	1.1107	5.657	1.0686	5.336	1.0141	3.295	0.9374
688.04			5.661	1.1214	5.299	1.0386	5.653	1.0702	5.395	1.137	5.362	1.1099	5.765	1.089	5.358	1.0182	3.285	0.9346
688.22			5.603	1.1099	5.379	1.0543	5.772	1.0928	5.473	1.1534	5.284	1.0938	5.779	1.0916	5.427	1.0314	3.286	0.9349
688.41			5.556	1.1006	5.273	1.0335	5.671	1.0736	5.276	1.1119	5.241	1.0849	5.773	1.0905	5.434	1.0327	3.249	0.9243
688.59			5.536	1.0967	5.254	1.0298	5.675	1.0744	5.277	1.1121	5.203	1.077	5.739	1.0841	5.373	1.0211	3.248	0.924
688.77			5.481	1.0858	5.296	1.038	5.649	1.0695	5.239	1.1041	5.257	1.0882	5.854	1.1058	5.581	1.0606	3.324	0.9457
688.96			5.456	1.0808	5.274	1.0337	5.672	1.0738	5.337	1.1248	5.175	1.0712	5.808	1.0971	5.641	1.072	3.326	0.9462
689.14			5.351	1.06	5.289	1.0367	5.647	1.0691	5.372	1.1321	5.277	1.0923	5.829	1.1011	5.658	1.0753	3.413	0.971
689.33			5.256	1.0412	5.314	1.0416	5.539	1.0487	5.374	1.1326	5.28	1.0929	5.799	1.0954	5.559	1.0564	3.408	0.9696
689.51			5.239	1.0378	5.307	1.0402	5.586	1.0576	5.39	1.1359	5.435	1.125	5.777	1.0912	5.562	1.057	3.48	0.99
689.7			5.038	0.998	5.266	1.0321	5.559	1.0524	5.374	1.1326	5.455	1.1292	5.842	1.1035	5.579	1.0602	3.549	1.0097
689.88			5.017	0.9939	5.284	1.0357	5.557	1.0521	5.257	1.1079	5.48	1.1343	5.909	1.1162	5.509	1.0469	3.446	0.9804
690.07			4.988	0.9881	5.3	1.0388	5.615	1.063	5.384	1.1347	5.474	1.1331	5.758	1.0876	5.502	1.0456	3.462	0.9849
690.25			5.113	1.0129	5.336	1.0459	5.546	1.05	5.374	1.1326	5.434	1.1248	5.726	1.0816	5.458	1.0372	3.337	0.9494
690.44			5.13	1.0162	5.428	1.0639	5.644	1.0685	5.525	1.1644	5.537	1.1461	5.908	1.116	5.557	1.0561	3.418	0.9724
690.62			5.037	0.9978	5.28	1.0349	5.633	1.0665	5.559	1.1715	5.626	1.1646	6.027	1.1385	5.665	1.0766	3.499	0.9954
690.81			5.067	1.0038	5.303	1.0394	5.661	1.0718	5.622	1.1848	5.571	1.1532	5.919	1.1181	5.648	1.0734	3.509	0.9983
690.99			5.086	1.0075	5.37	1.0525	5.662	1.0719	5.583	1.1766	5.597	1.1586	5.947	1.1233	5.689	1.0811	3.535	1.0057
691.17			5.099	1.0101	5.335	1.0457	5.584	1.0572	5.468	1.1524	5.435	1.125	5.9	1.1145	5.638	1.0715	3.506	0.9974
691.36			5.18	1.0261	5.379	1.0543	5.716	1.0822	5.53	1.1654	5.433	1.1246	5.898	1.1141	5.718	1.0867	3.546	1.0088
691.54			5.237	1.0374	5.269	1.0327	5.649	1.0695	5.521	1.1635	5.398	1.1174	5.929	1.1199	5.752	1.0931	3.512	0.9991
691.73			5.436	1.0769	5.38	1.0545	5.714	1.0818	5.524	1.1642	5.391	1.1159	5.922	1.1186	5.794	1.1011	3.514	0.9997
691.91			5.426	1.0749	5.359	1.0504	5.699	1.0789	5.467	1.1522	5.365	1.1105	5.934	1.1209	5.816	1.1053	3.557	1.0119
692.1			5.408	1.0713	5.325	1.0437	5.691	1.0774	5.377	1.1332	5.424	1.1227	5.986	1.1307	5.825	1.107	3.522	1.002
692.28			5.39	1.0677	5.394	1.0572	5.69	1.0772	5.379	1.1336	5.527	1.1441	6.044	1.1417	5.895	1.1203	3.628	1.0321
692.47			5.455	1.0806	5.381	1.0547	5.685	1.0763	5.355	1.1286	5.416	1.1211	5.911	1.1165	5.823	1.1066	3.597	1.0233
692.65			5.532	1.0959	5.508	1.0796	5.667	1.0729	5.368	1.1313	5.287	1.0944	5.808	1.0971	5.741	1.091	3.496	0.9946
[truncated: 40 more rows]
